# Supplementary material for: Three-component synthesis, utilization and biological activity of phosphinoyl-functionalized isoindolinones
Source: Royal Society of Chemistry journal article supplement (doi:10.1039/d1ob01610e), 2021-01-01
Supplement: d1ob01610e1.pdf [file d1ob01610e1.pdf]

Supporting Information

for

**Three-component synthesis, utilization and biological activity of  
phosphinoyl-functionalized isoindolinones**

Nóra Popovics-Tóth,<sup>a</sup> Bettina Rávai,<sup>a</sup> Ádám Tajti,<sup>a</sup> Bence Varga,<sup>a</sup> Péter Bagi,<sup>a</sup> Franc Perdih,<sup>b</sup>  
Pál Tamás Szabó,<sup>c</sup> László Hackler Jr.,<sup>d</sup> László G. Puskás<sup>d</sup> and Erika Bálint<sup>\*a</sup>

*<sup>a</sup>Department of Organic Chemistry and Technology, Budapest University of Technology and  
Economics, 1521 Budapest, Hungary*

*<sup>b</sup>Faculty of Chemistry and Chemical Technology, University of Ljubljana, SI-1000 Ljubljana,  
Slovenia*

*<sup>c</sup>MS Metabolomics Research Group, Centre for Structural Study, Research Centre for Natural  
Sciences, Eötvös Loránd Research Network, Magyar tudósok krt. 2, H-1117 Budapest,  
Hungary*

*<sup>d</sup>Avidin Ltd., Alsó kikötő sor 11/D, H-6726 Szeged, Hungary*

## Table of contents

|                                                                                                                                         |     |
|-----------------------------------------------------------------------------------------------------------------------------------------|-----|
| General information.....                                                                                                                | S3  |
| General procedure for the synthesis of 3-oxoisoindolin-1-ylphosphine oxides.....                                                        | SS3 |
| General procedure for the synthesis of diphenyl(2-butyl-3-oxo-2,3-dihydro-2 <i>H</i> -isoindol-1-yl)-phosphine.....                     | S19 |
| General procedure for the synthesis of diphenyl(2-butyl-3-oxo-2,3-dihydro-2 <i>H</i> -isoindol-1-yl)-phosphine sulphide.....            | S19 |
| General procedure for the synthesis of [diphenyl(2-butyl-3-oxo-2,3-dihydro-2 <i>H</i> -isoindol-1-yl)-phosphine] dichloroplatinum ..... | S19 |
| Single crystal X-ray diffraction measurements .....                                                                                     | S20 |
| <sup>1</sup> H NMR, <sup>13</sup> C NMR and <sup>31</sup> P NMR spectra .....                                                           | S25 |
| References.....                                                                                                                         | S69 |

## General information

The reactions were carried out at 25 °C under N<sub>2</sub> atmosphere.

High-performance liquid chromatography-mass spectrometry (HPLC-MS) measurements were performed with an Agilent 1200 liquid chromatography system coupled with a 6130 quadrupole mass spectrometer equipped with an ESI ion source (Agilent Technologies, Palo Alto, CA, USA). Analysis was performed at 40 °C on a Gemini C18 column (150 mm × 4.6 mm, 3 μm; Phenomenex, Torrance, CA, USA) with a mobile phase flow rate of 0.6 mL/min. Composition of eluent A was 0.1% (NH<sub>4</sub>)(HCOO) in water; eluent B was 0.1% (NH<sub>4</sub>)(HCOO) and 8% water in acetonitrile, 0–3 min 5% B, 3–13 min gradient, 13–20 min 100% B. The injection volume was 2 μL. The chromatographic profile was registered at 254 nm. The MSD operating parameters were as follows: positive ionization mode, scan spectra from m/z 120 to 1000, drying gas temperature 300 °C, nitrogen flow rate 12 L/min, nebulizer pressure 60 psi, capillary voltage 4000 V.

The <sup>31</sup>P, <sup>13</sup>C, <sup>1</sup>H NMR spectra were taken in CDCl<sub>3</sub> solution on a Bruker AV-300 or DRX-500 spectrometer operating at 121.5, 75.5 and 300 or 202.4, 125.7 and 500 MHz, respectively. Chemical shifts are downfield relative to 85% H<sub>3</sub>PO<sub>4</sub> and TMS. Non-equivalence effects were observed in <sup>1</sup>H and <sup>13</sup>C{<sup>1</sup>H} NMR spectra. Corresponding pairs of resonances were marked with (I) and (II), respectively.

High resolution measurements were performed on a Sciex TripleTOF 5600+ high resolution tandem mass spectrometer equipped with DuoSpray ion source. Electrospray ionization was applied in positive ion detection mode. Samples were dissolved in acetonitrile and flow injected into acetonitrile:water 50:50 flow. The flow rate was 0.2 mL/min. The resolution of the mass spectrometer was 35000.

## General procedure for the synthesis of 3-oxoisindolin-1-ylphosphine oxides (7-20)

A mixture of 1.0 mmol (0.15 g) of 2-formylbenzoic acid, 1.0 mmol of primary amine (0.10 mL of butylamine, 0.12 mL of cyclohexylamine, 0.11 mL of benzylamine or 0.09 mL of aniline) and 1.0 mmol of secondary phosphine oxide (0.20 g of diphenylphosphine oxide, 0.23 g of bis(*p*-tolyl)phosphine oxide, 0.26 g of bis(3,5-dimethylphenyl)phosphine oxide, 0.30 g of bis(2-naphthyl)phosphine oxide, 0.23 g of dibenzylphosphine oxide, 0.18 g of *tert*-butyl(phenyl)phosphine oxide, 0.22 g of 2-methylphenyl(phenyl)phosphine oxide, 0.27 g of 2-trifluoromethylphenyl(phenyl)phosphine oxide, 0.27 g of 3-trifluoromethylphenyl(phenyl)-phosphine oxide, 0.27 g of 4-trifluoromethylphenyl(phenyl)phosphine oxide, 0.28 g of 2-phenylphenyl(phenyl)phosphine oxide or 0.25 g of 1-naphthyl(phenyl)phosphine oxide)

was stirred without solvent or in 1 mL of ethanol, toluene or acetonitrile at room temperature under nitrogen atmosphere. The reaction mixtures were analyzed by HPLC chromatography. The solvent and the water formed were eliminated in vacuum, and the crude product so obtained was passed through a 1 cm silica layer using dichloromethane:methanol 97:3 as the eluent. The following products were thus prepared:

#### **Diphenyl (2-butyl-3-oxo-2,3-dihydro-2*H*-isoindol-1-yl)phosphine oxide (7a)**

Yield: 98% (0.38 g), white crystals; Mp: 74–75 °C; <sup>1</sup>H NMR (CDCl<sub>3</sub>) δ 0.86 (t, *J*<sub>HH</sub> = 7.4, 3H, CH<sub>3</sub>(CH<sub>2</sub>)<sub>3</sub>N), 1.10–1.26 (m, 2H, CH<sub>2</sub>(CH<sub>2</sub>)<sub>2</sub>N), 1.48–1.66 (m, 2H, CH<sub>2</sub>CH<sub>2</sub>N), 3.17–3.25 (m, 1H, CH<sub>A</sub>, CH<sub>2</sub>N), 3.92–4.01 (m, 1H, CH<sub>B</sub>, CH<sub>2</sub>N), 5.49 (d, 1H, <sup>2</sup>*J*<sub>HP</sub> = 11.1, C<sub>1</sub>H), 6.94 (d, 1H, *J*<sub>HH</sub> = 7.7, ArH), 7.28–7.36 (m, 1H, ArH), 7.36–7.44 (m, 5H, ArH), 7.44–7.49 (m, 2H, ArH), 7.52–7.60 (m, 2H, ArH), 7.64–7.71 (m, 3H, ArH); <sup>13</sup>C NMR (CDCl<sub>3</sub>) δ 13.7 (CH<sub>3</sub>(CH<sub>2</sub>)<sub>3</sub>N), 19.9 (CH<sub>2</sub>(CH<sub>2</sub>)<sub>2</sub>N), 30.0 (CH<sub>2</sub>CH<sub>2</sub>N), 41.7 (CH<sub>2</sub>N), 61.0 (d, <sup>1</sup>*J*<sub>CP</sub> = 72.8, C<sub>1</sub>), 123.7 (d, *J*<sub>CP</sub> = 1.2, C<sub>4</sub>), 124.0 (d, <sup>3</sup>*J*<sub>CP</sub> = 2.4, C<sub>7</sub>), 127.8 (d, <sup>1</sup>*J*<sub>CP</sub> = 81.7, C<sub>1</sub><sup>I</sup>), 128.6 (d, <sup>1</sup>*J*<sub>CP</sub> = 81.8, C<sub>1</sub><sup>II</sup>), 128.65 (d, <sup>3</sup>*J*<sub>CP</sub> = 11.7, C<sub>3</sub><sup>I</sup>), 128.66 (d, *J*<sub>CP</sub> = 1.9, C<sub>5</sub>), 128.67 (d, <sup>3</sup>*J*<sub>CP</sub> = 11.7, C<sub>3</sub><sup>II</sup>), 131.1 (d, *J*<sub>CP</sub> = 2.2, C<sub>6</sub>), 131.6 (d, <sup>2</sup>*J*<sub>CP</sub> = 8.8, C<sub>2</sub><sup>I</sup>), 131.7 (d, <sup>2</sup>*J*<sub>CP</sub> = 9.0, C<sub>2</sub><sup>II</sup>), 132.75 (d, *J*<sub>CP</sub> = 2.9, C<sub>3a</sub>), 132.77 (d, *J*<sub>CP</sub> = 2.6, C<sub>4</sub><sup>I</sup>), 132.9 (d, <sup>3</sup>*J*<sub>CP</sub> = 2.8, C<sub>4</sub><sup>II</sup>), 138.6 (d, <sup>2</sup>*J*<sub>CP</sub> = 2.5, C<sub>7a</sub>), 168.6 (d, <sup>3</sup>*J*<sub>CP</sub> = 1.9, C<sub>3</sub>); <sup>31</sup>P (CDCl<sub>3</sub>) δ 30.6; [M+H]<sup>+</sup><sub>found</sub> = 390.1614, C<sub>24</sub>H<sub>25</sub>NO<sub>2</sub>P requires 390.1622.

#### **Diphenyl (2-cyclohexyl-3-oxo-2,3-dihydro-2*H*-isoindol-1-yl)phosphine oxide (7b)**

Yield: 94% (0.39 g), white crystals; Mp: 59–61 °C; <sup>1</sup>H NMR (CDCl<sub>3</sub>) δ 1.13–1.36 (m, 3H, <sup>c</sup>HexH), 1.48–1.83 (m, 5H, <sup>c</sup>HexH), 2.01–2.22 (m, 1H, <sup>c</sup>HexH), 2.36–2.63 (m, 1H, <sup>c</sup>HexH), 3.55–3.73 (m, 1H, C<sub>1</sub><sup>I</sup>H), 5.42 (d, 1H, <sup>2</sup>*J*<sub>HP</sub> = 11.7, C<sub>1</sub>H), 6.63 (d, 1H, *J*<sub>HH</sub> = 7.7, ArH), 7.17–7.43 (m, 7H, ArH), 7.44–7.56 (m, 2H, ArH), 7.56–7.64 (m, 1H, ArH), 7.64–7.82 (m, 3H, ArH); <sup>13</sup>C NMR (CDCl<sub>3</sub>) δ 25.2 (C<sub>4</sub><sup>I</sup>), 26.0 (C<sub>3</sub><sup>I</sup>), 26.3 (C<sub>3</sub><sup>II</sup>), 29.2 (C<sub>2</sub><sup>I</sup>), 30.0 (C<sub>2</sub><sup>II</sup>), 57.5 (C<sub>1</sub><sup>I</sup>), 63.4 (d, <sup>1</sup>*J*<sub>CP</sub> = 73.4, C<sub>1</sub>), 123.5 (d, *J*<sub>CP</sub> = 1.1, C<sub>4</sub>), 123.7 (d, <sup>3</sup>*J*<sub>CP</sub> = 2.4, C<sub>7</sub>), 126.8 (d, <sup>1</sup>*J*<sub>CP</sub> = 98.6, C<sub>1</sub><sup>II</sup>), 128.4 (d, <sup>3</sup>*J*<sub>CP</sub> = 11.8, C<sub>3</sub><sup>II</sup>), 128.7 (d, *J*<sub>CP</sub> = 2.6, C<sub>5</sub>), 128.8 (d, <sup>3</sup>*J*<sub>CP</sub> = 11.8, C<sub>3</sub><sup>III</sup>), 130.1 (d, <sup>1</sup>*J*<sub>CP</sub> = 97.4, C<sub>1</sub><sup>III</sup>), 130.9 (d, *J*<sub>CP</sub> = 2.3, C<sub>6</sub>), 131.6 (d, <sup>2</sup>*J*<sub>CP</sub> = 8.8, C<sub>2</sub><sup>III</sup>), 132.2 (d, <sup>2</sup>*J*<sub>CP</sub> = 8.6, C<sub>2</sub><sup>IV</sup>), 132.7 (d, *J*<sub>CP</sub> = 2.0, C<sub>4</sub><sup>II</sup>), 132.8 (d, *J*<sub>CP</sub> = 2.3, C<sub>4</sub><sup>III</sup>), 134.4 (d, <sup>3</sup>*J*<sub>CP</sub> = 3.1, C<sub>3a</sub>), 138.9 (d, <sup>2</sup>*J*<sub>CP</sub> = 1.3, C<sub>7a</sub>), 169.0 (d, <sup>3</sup>*J*<sub>CP</sub> = 1.8, C<sub>3</sub>); <sup>31</sup>P (CDCl<sub>3</sub>) δ 30.8; [M+H]<sup>+</sup><sub>found</sub> = 416.1772, C<sub>26</sub>H<sub>27</sub>NO<sub>2</sub>P requires 416.1779.



**Diphenyl (2-benzyl-3-oxo-2,3-dihydro-2*H*-isoindol-1-yl)phosphine oxide (7c)**

Yield: 97% (0.41 g), light yellow crystals; Mp: 80–81 °C; <sup>1</sup>H NMR (CDCl<sub>3</sub>) δ 4.37 (d, 1H, *J*<sub>HH</sub> = 15.0, CH<sub>A</sub>, CH<sub>2</sub>N), 5.31 (d, 1H, <sup>2</sup>*J*<sub>HP</sub> = 10.7, C<sub>1</sub>H), 5.40 (d, 1H, *J*<sub>HH</sub> = 15.0, CH<sub>B</sub>, CH<sub>2</sub>N), 6.83 (d, 1H, *J*<sub>HH</sub> = 7.6, ArH), 7.08–7.20 (m, 2H, ArH), 7.21–7.52 (m, 12H, ArH), 7.52–7.79 (m, 4H, ArH); <sup>13</sup>C NMR (CDCl<sub>3</sub>) δ 45.3 (CH<sub>2</sub>N), 60.2 (d, <sup>1</sup>*J*<sub>CP</sub> = 73.1, C<sub>1</sub>), 124.0 (d, *J*<sub>CP</sub> = 0.4, C<sub>4</sub>), 124.1 (d, <sup>3</sup>*J*<sub>CP</sub> = 1.8, C<sub>7</sub>), 127.55 (d, <sup>1</sup>*J*<sub>CP</sub> = 97.9, C<sub>1</sub><sup>''I</sup>), 127.59 (C<sub>4</sub><sup>'</sup>), 128.3 (C<sub>3</sub><sup>'</sup>), 128.66 (C<sub>2</sub><sup>'</sup>), 128.69 (d, <sup>3</sup>*J*<sub>CP</sub> = 11.6, C<sub>3</sub><sup>''I</sup>), 128.74 (d, *J*<sub>CP</sub> = 2.3, C<sub>5</sub>), 128.75 (d, <sup>3</sup>*J*<sub>CP</sub> = 11.7, C<sub>3</sub><sup>''II</sup>), 128.9 (d, <sup>1</sup>*J*<sub>CP</sub> = 97.7, C<sub>1</sub><sup>''II</sup>), 131.3 (d, *J*<sub>CP</sub> = 2.2, C<sub>6</sub>), 131.6 (d, <sup>2</sup>*J*<sub>CP</sub> = 8.9, C<sub>2</sub><sup>''I</sup>), 132.0 (d, <sup>2</sup>*J*<sub>CP</sub> = 8.9, C<sub>2</sub><sup>''II</sup>), 132.5 (d, <sup>3</sup>*J*<sub>CP</sub> = 3.0, C<sub>3a</sub>), 132.8 (d, *J*<sub>CP</sub> = 2.8, C<sub>4</sub><sup>''I</sup>), 132.9 (d, *J*<sub>CP</sub> = 2.8, C<sub>4</sub><sup>''II</sup>), 136.6 (C<sub>1</sub><sup>'</sup>), 138.9 (d, <sup>2</sup>*J*<sub>CP</sub> = 2.4, C<sub>7a</sub>), 168.9 (d, <sup>3</sup>*J*<sub>CP</sub> = 1.5, C<sub>3</sub>); <sup>31</sup>P (CDCl<sub>3</sub>) δ 30.8; [M+H]<sup>+</sup><sub>found</sub> = 424.1457, C<sub>27</sub>H<sub>23</sub>NO<sub>2</sub>P requires 424.1466.

**Diphenyl (2-phenyl-3-oxo-2,3-dihydro-2*H*-isoindol-1-yl)phosphine oxide (7d)**

Yield: 96% (0.39 g), white crystals; Mp: 268–270 °C; <sup>1</sup>H NMR (CDCl<sub>3</sub>) δ 6.50 (t, 1H, *J*<sub>HH</sub> = 7.2, ArH), 6.57 (dd, 1H, *J*<sub>HH</sub> = 5.7, <sup>2</sup>*J*<sub>HP</sub> = 11.0, C<sub>1</sub>H), 6.83 (d, 2H, *J*<sub>HH</sub> = 8.0, ArH), 6.97 (t, 2H, *J*<sub>HH</sub> = 7.6, ArH), 7.17–7.28 (m, 4H, ArH), 7.32 (t, 1H, *J*<sub>HH</sub> = 11.6, ArH), 7.36–7.42 (m, 1H, ArH), 7.54 (t, 1H, *J*<sub>HH</sub> = 7.6, ArH), 7.58–7.67 (m, 4H, ArH), 7.89–7.98 (m, 3H, ArH); <sup>13</sup>C NMR (CDCl<sub>3</sub>) δ 50.7 (d, <sup>1</sup>*J*<sub>CP</sub> = 76.6, C<sub>1</sub>), 113.9 (d, *J*<sub>CP</sub> = 0.7, C<sub>4</sub>), 117.6 (d, <sup>3</sup>*J*<sub>CP</sub> = 0.5, C<sub>7</sub>), 127.7 (d, *J*<sub>CP</sub> = 2.0, C<sub>5</sub>), 128.3 (d, <sup>3</sup>*J*<sub>CP</sub> = 11.6, C<sub>3</sub><sup>''I</sup>), 129.3 (C<sub>4</sub><sup>'</sup>), 129.4 (d, <sup>3</sup>*J*<sub>CP</sub> = 11.5, C<sub>3</sub><sup>''II</sup>), 129.8 (d, *J*<sub>CP</sub> = 4.8, C<sub>3</sub><sup>'</sup>), 129.9 (d, *J*<sub>CP</sub> = 5.0, C<sub>2</sub><sup>'</sup>), 130.7 (d, *J*<sub>CP</sub> = 5.5, C<sub>6</sub>), 131.3 (d, <sup>1</sup>*J*<sub>CP</sub> = 97.7, C<sub>1</sub><sup>''I</sup>), 131.36 (d, <sup>2</sup>*J*<sub>CP</sub> = 8.7, C<sub>2</sub><sup>''I</sup>), 131.40 (d, <sup>2</sup>*J*<sub>CP</sub> = 9.0, C<sub>2</sub><sup>''II</sup>), 132.0 (d, <sup>1</sup>*J*<sub>CP</sub> = 96.8, C<sub>1</sub><sup>''II</sup>), 132.1 (d, <sup>3</sup>*J*<sub>CP</sub> = 1.9, C<sub>3a</sub>), 132.55 (d, *J*<sub>CP</sub> = 2.4, C<sub>4</sub><sup>''I</sup>), 132.62 (d, *J*<sub>CP</sub> = 2.3, C<sub>4</sub><sup>''II</sup>), 139.6 (C<sub>7a</sub>), 147.6 (d, <sup>3</sup>*J*<sub>CP</sub> = 11.8, C<sub>1</sub><sup>''</sup>), 169.1 (d, <sup>3</sup>*J*<sub>CP</sub> = 0.9, C<sub>3</sub>); <sup>31</sup>P (CDCl<sub>3</sub>) δ 31.8; [M+H]<sup>+</sup><sub>found</sub> = 410.1322, C<sub>26</sub>H<sub>21</sub>NO<sub>2</sub>P requires 410.1304.

**Bis(*p*-tolyl) (2-butyl-3-oxo-2,3-dihydro-2*H*-isoindol-1-yl)phosphine oxide (8a)**

Yield: 99% (0.41 g), light yellow crystals; Mp: 72–74 °C; <sup>1</sup>H NMR (CDCl<sub>3</sub>) δ 0.86 (t, *J*<sub>HH</sub> = 7.2, 3H, CH<sub>3</sub>(CH<sub>2</sub>)<sub>3</sub>N), 1.10–1.28 (m, 2H, CH<sub>2</sub>(CH<sub>2</sub>)<sub>2</sub>N), 1.47–1.69 (m, 2H, CH<sub>2</sub>CH<sub>2</sub>N), 2.37 (s, 3H, C<sub>4</sub><sup>'</sup>CH<sub>3</sub><sup>I</sup>), 2.41 (s, 3H, C<sub>4</sub><sup>'</sup>CH<sub>3</sub><sup>II</sup>), 3.20–3.35 (m, 1H, CH<sub>A</sub>, CH<sub>2</sub>N), 3.89–4.04 (m, 1H, CH<sub>B</sub>, CH<sub>2</sub>N), 5.44 (d, 1H, <sup>2</sup>*J*<sub>HP</sub> = 11.4, C<sub>1</sub>H), 6.94 (d, 1H, *J*<sub>HH</sub> = 7.5, ArH), 7.11–7.44 (m, 9H, ArH), 7.45–7.62 (m, 2H, ArH), 7.68 (d, 1H, *J*<sub>HH</sub> = 7.3, ArH); <sup>13</sup>C NMR (CDCl<sub>3</sub>) δ 13.7 (CH<sub>3</sub>(CH<sub>2</sub>)<sub>3</sub>N), 19.9 (CH<sub>2</sub>(CH<sub>2</sub>)<sub>2</sub>N), 21.6 (C<sub>4</sub><sup>'</sup>CH<sub>3</sub><sup>I</sup>), 21.7 (C<sub>4</sub><sup>'</sup>CH<sub>3</sub><sup>II</sup>), 30.0 (CH<sub>2</sub>CH<sub>2</sub>N), 41.8 (CH<sub>2</sub>N), 61.2 (d, <sup>1</sup>*J*<sub>CP</sub> = 72.7, C<sub>1</sub>), 123.6 (d, *J*<sub>CP</sub> = 1.2, C<sub>4</sub>), 124.1 (d, <sup>3</sup>*J*<sub>CP</sub> = 2.5, C<sub>7</sub>), 124.4 (d,

$^1J_{\text{CP}} = 84.5$ ,  $C_1^{\text{I}}$ ), 125.8 (d,  $^1J_{\text{CP}} = 84.3$ ,  $C_1^{\text{II}}$ ), 128.5 (d,  $J_{\text{CP}} = 1.7$ ,  $C_5$ ), 129.36 (d,  $^3J_{\text{CP}} = 12.1$ ,  $C_3^{\text{I}}$ ), 129.40 (d,  $^3J_{\text{CP}} = 12.1$ ,  $C_3^{\text{II}}$ ), 131.0 (d,  $J_{\text{CP}} = 1.8$ ,  $C_6$ ), 131.6 (d,  $^2J_{\text{CP}} = 8.7$ ,  $C_2^{\text{I}}$ ), 131.7 (d,  $^2J_{\text{CP}} = 8.9$ ,  $C_2^{\text{II}}$ ), 132.9 (d,  $^3J_{\text{CP}} = 3.1$ ,  $C_{3a}$ ), 138.9 (d,  $^2J_{\text{CP}} = 2.7$ ,  $C_{7a}$ ), 143.4 (d,  $J_{\text{CP}} = 2.8$ ,  $C_4^{\text{I}}$ ), 143.5 (d,  $J_{\text{CP}} = 2.9$ ,  $C_4^{\text{II}}$ ), 168.6 (d,  $^3J_{\text{CP}} = 1.5$ ,  $C_3$ );  $^{31}\text{P}$  ( $\text{CDCl}_3$ )  $\delta$  31.2;  $[\text{M}+\text{H}]^+_{\text{found}} = 418.1922$ ,  $\text{C}_{26}\text{H}_{29}\text{NO}_2\text{P}$  requires 418.1935.

### **Bis(*p*-tolyl) (2-cyclohexyl-3-oxo-2,3-dihydro-2*H*-isoindol-1-yl)phosphine oxide (8b)**

Yield: 97% (0.43 g), white crystals; Mp: 76–78 °C;  $^1\text{H}$  NMR ( $\text{CDCl}_3$ ) 1.06–1.16 (m, 1H,  $^{\text{e}}\text{HexH}$ ), 1.17–1.30 (m, 2H,  $^{\text{e}}\text{HexH}$ ), 1.53–1.65 (m, 2H,  $^{\text{e}}\text{HexH}$ ), 1.67–1.80 (m, 3H,  $^{\text{e}}\text{HexH}$ ), 2.08–2.18 (m, 1H,  $^{\text{e}}\text{HexH}$ ), 2.34 (s, 3H,  $C_4^{\text{II}}\text{CH}_3^{\text{I}}$ ), 2.45–2.48 [2.44 (s,  $C_4^{\text{II}}\text{CH}_3^{\text{II}}$ ), overlapped by the multiplet of  $^{\text{e}}\text{HexH}$  total int. 4H], 3.69–3.78 (m, 1H,  $C_1^{\text{I}}\text{H}$ ), 5.40 (d, 1H,  $^2J_{\text{HP}} = 11.9$ ,  $C_1\text{H}$ ), 6.59 (d, 1H,  $J_{\text{HH}} = 7.7$ , ArH), 7.04–7.13 (m, 4H, ArH), 7.24–7.33 (m, 3H, ArH), 7.36–7.42 (m, 1H, ArH), 7.57–7.64 (m, 2H, ArH), 7.68 (d, 1H,  $J_{\text{HH}} = 7.7$ , ArH);  $^{13}\text{C}$  NMR ( $\text{CDCl}_3$ )  $\delta$  21.5 (d,  $J_{\text{CP}} = 1.2$ ,  $C_4^{\text{II}}\text{CH}_3^{\text{I}}$ ), 21.7 (d,  $J_{\text{CP}} = 1.1$ ,  $C_4^{\text{II}}\text{CH}_3^{\text{II}}$ ), 25.2 ( $C_4^{\text{I}}$ ), 26.0 ( $C_3^{\text{I}}$ ), 26.3 ( $C_3^{\text{II}}$ ), 29.2 ( $C_2^{\text{I}}$ ), 30.0 ( $C_2^{\text{II}}$ ), 57.5 ( $C_1^{\text{I}}$ ), 63.5 (d,  $^1J_{\text{CP}} = 74.4$ ,  $C_1$ ), 123.2 (d,  $^1J_{\text{CP}} = 100.9$ ,  $C_1^{\text{II}}$ ), 123.5 (d,  $J_{\text{CP}} = 1.2$ ,  $C_4$ ), 123.7 (d,  $^3J_{\text{CP}} = 2.4$ ,  $C_7$ ), 127.3 (d,  $^1J_{\text{CP}} = 99.8$ ,  $C_1^{\text{III}}$ ), 126.6 (d,  $J_{\text{CP}} = 2.1$ ,  $C_5$ ), 129.1 (d,  $^3J_{\text{CP}} = 12.2$ ,  $C_3^{\text{I}}$ ), 129.5 (d,  $^3J_{\text{CP}} = 12.0$ ,  $C_3^{\text{II}}$ ), 130.8 (d,  $J_{\text{CP}} = 2.4$ ,  $C_6$ ), 131.6 (d,  $^2J_{\text{CP}} = 9.3$ ,  $C_2^{\text{I}}$ ), 132.3 (d,  $^2J_{\text{CP}} = 8.8$ ,  $C_2^{\text{II}}$ ), 134.5 (d,  $^3J_{\text{CP}} = 3.4$ ,  $C_{3a}$ ), 139.1 (d,  $^2J_{\text{CP}} = 1.1$ ,  $C_{7a}$ ), 143.30 ( $C_4^{\text{I}}$ ), 143.33 ( $C_4^{\text{II}}$ ), 169.0 (d,  $^3J_{\text{CP}} = 2.0$ ,  $C_3$ );  $^{31}\text{P}$  ( $\text{CDCl}_3$ )  $\delta$  31.7;  $[\text{M}+\text{H}]^+_{\text{found}} = 444.2077$ ,  $\text{C}_{28}\text{H}_{31}\text{NO}_2\text{P}$  requires 444.2086.

### **Bis(*p*-tolyl) (2-benzyl-3-oxo-2,3-dihydro-2*H*-isoindol-1-yl)phosphine oxide (8c)**

Yield: 97% (0.44 g), light yellow crystals; Mp: 80–82 °C;  $^1\text{H}$  NMR ( $\text{CDCl}_3$ )  $\delta$  2.39 (s, 3H,  $C_4^{\text{II}}\text{CH}_3^{\text{I}}$ ), 2.41 (s, 3H,  $C_4^{\text{II}}\text{CH}_3^{\text{II}}$ ), 4.45 (d, 1H,  $J_{\text{HH}} = 14.9$ ,  $\text{CH}_A$ ,  $\text{CH}_2\text{N}$ ), 5.27 (d, 1H,  $^2J_{\text{HP}} = 10.9$ ,  $C_1\text{H}$ ), 5.38 (d, 1H,  $J_{\text{HH}} = 14.9$ ,  $\text{CH}_B$ ,  $\text{CH}_2\text{N}$ ), 6.82 (d, 1H,  $J_{\text{HH}} = 7.7$ , ArH), 7.08–7.45 (m, 13H, ArH), 7.46–7.64 (m, 2H, ArH), 7.74 (d, 1H,  $J_{\text{HH}} = 7.5$ , ArH);  $^{13}\text{C}$  NMR ( $\text{CDCl}_3$ )  $\delta$  21.6 ( $C_4^{\text{II}}\text{CH}_3^{\text{I}}$ ), 21.7 ( $C_4^{\text{II}}\text{CH}_3^{\text{II}}$ ), 45.2 ( $\text{CH}_2\text{N}$ ), 60.3 (d,  $^1J_{\text{CP}} = 73.1$ ,  $C_1$ ), 124.0 (d,  $J_{\text{CP}} = 1.0$ ,  $C_4$ ), 124.06 (d,  $^3J_{\text{CP}} = 2.3$ ,  $C_7$ ), 124.12 (d,  $^1J_{\text{CP}} = 101.1$ ,  $C_1^{\text{I}}$ ), 126.0 (d,  $^1J_{\text{CP}} = 100.1$ ,  $C_1^{\text{II}}$ ), 127.5 ( $C_4^{\text{I}}$ ), 128.4 ( $C_3^{\text{I}}$ ), 128.60 (d,  $J_{\text{CP}} = 3.3$ ,  $C_5$ ), 128.61 ( $C_2^{\text{I}}$ ), 129.36 (d,  $^3J_{\text{CP}} = 12.0$ ,  $C_3^{\text{I}}$ ), 129.44 (d,  $^3J_{\text{CP}} = 12.2$ ,  $C_3^{\text{II}}$ ), 131.2 (d,  $J_{\text{CP}} = 1.8$ ,  $C_6$ ), 131.6 (d,  $^2J_{\text{CP}} = 9.3$ ,  $C_2^{\text{I}}$ ), 132.0 (d,  $^2J_{\text{CP}} = 9.2$ ,  $C_2^{\text{II}}$ ), 132.6 (d,  $^3J_{\text{CP}} = 2.9$ ,  $C_{3a}$ ), 136.8 ( $C_1^{\text{I}}$ ), 139.1 (d,  $^2J_{\text{CP}} = 2.1$ ,  $C_{7a}$ ), 143.4 (d,  $J_{\text{CP}} = 2.8$ ,

C<sub>4</sub><sup>''I</sup>), 143.7 (d,  $J_{CP} = 3.0$ , C<sub>4</sub><sup>''II</sup>), 168.8 (d,  $^3J_{CP} = 1.6$ , C<sub>3</sub>);  $^{31}\text{P}$  (CDCl<sub>3</sub>)  $\delta$  31.4;  $[\text{M}+\text{H}]^+$ <sub>found</sub> = 452.1765, C<sub>29</sub>H<sub>27</sub>NO<sub>2</sub>P requires 452.1779.

**Bis(*p*-tolyl) (2-phenyl-3-oxo-2,3-dihydro-2*H*-isoindol-1-yl)phosphine oxide (8d)**

Yield: 98% (0.43 g), white crystals; Mp: 188–190 °C;  $^1\text{H}$  NMR (CDCl<sub>3</sub>)  $\delta$  2.22 (s, 3H, C<sub>4</sub><sup>''</sup>CH<sub>3</sub><sup>I</sup>), 2.36 (s, 3H, C<sub>4</sub><sup>''</sup>CH<sub>3</sub><sup>II</sup>), 6.41–6.55 [6.50 (d, 2H,  $^2J_{HP} = 6.8$ , C<sub>1</sub>H) overlapped by the multiplet of ArH, total int. 2H], 6.80 (d, 2H,  $J_{HH} = 8.1$ , ArH), 6.97 (t, 2H,  $J_{HH} = 7.7$ , ArH), 7.00–7.15 (m, 3H, ArH), 7.17–7.31 (m, 2H, ArH), 7.40 (dd, 2H,  $J_{HH} = 8.1$ ,  $J_{HH} = 2.8$ , ArH), 7.52 (t, 1H,  $J_{HH} = 7.4$ , ArH), 7.67 (d, 1H,  $J_{HH} = 7.8$ , ArH), 7.78 (d, 1H,  $J_{HH} = 7.8$ , ArH), 7.81 (d, 1H,  $J_{HH} = 7.9$ , ArH), 7.89 (d, 1H,  $J_{HH} = 7.9$ , ArH);  $^{13}\text{C}$  NMR (CDCl<sub>3</sub>)  $\delta$  21.5 (C<sub>4</sub><sup>''</sup>CH<sub>3</sub><sup>I</sup>), 21.6 (C<sub>4</sub><sup>''</sup>CH<sub>3</sub><sup>II</sup>), 50.8 (d,  $^1J_{CP} = 77.0$ , C<sub>1</sub>), 113.8 (d,  $J_{CP} = 0.6$ , C<sub>4</sub>), 117.5 (d,  $^3J_{CP} = 0.5$ , C<sub>7</sub>), 127.6 (d,  $J_{CP} = 1.7$ , C<sub>5</sub>), 128.4 (d,  $^1J_{CP} = 101.3$ , C<sub>1</sub><sup>''I</sup>), 128.9 (d,  $^3J_{CP} = 11.8$ , C<sub>3</sub><sup>''I</sup>), 129.0 (d,  $^1J_{CP} = 99.0$ , C<sub>1</sub><sup>''II</sup>), 129.3 (C<sub>4</sub><sup>'</sup>), 129.8 (d,  $J_{CP} = 4.3$ , C<sub>3</sub><sup>'</sup>), 129.9 (d,  $^3J_{CP} = 12.0$ , C<sub>3</sub><sup>''II</sup>), 130.1 (d,  $J_{CP} = 5.0$ , C<sub>2</sub><sup>'</sup>), 130.7 (d,  $J_{CP} = 2.2$ , C<sub>6</sub>), 131.4 (d,  $^2J_{CP} = 9.0$ , C<sub>2</sub><sup>''I</sup>), 131.5 (d,  $^2J_{CP} = 9.5$ , C<sub>2</sub><sup>''II</sup>), 132.4 (d,  $J_{CP} = 2.2$ , C<sub>3a</sub>), 139.8 (C<sub>7a</sub>), 142.0 (d,  $J_{CP} = 2.8$ , C<sub>4</sub><sup>''I</sup>), 142.6 (d,  $J_{CP} = 2.7$ , C<sub>4</sub><sup>''II</sup>), 147.7 (d,  $^3J_{CP} = 12.0$ , C<sub>1</sub><sup>'</sup>), 169.1 (d,  $^3J_{CP} = 1.5$ , C<sub>3</sub>);  $^{31}\text{P}$  (CDCl<sub>3</sub>)  $\delta$  31.3;  $[\text{M}+\text{H}]^+$ <sub>found</sub> = 438.1637, C<sub>28</sub>H<sub>25</sub>NO<sub>2</sub>P requires 438.1617.

**Bis(3,5-dimethylphenyl) (2-butyl-3-oxo-2,3-dihydro-2*H*-isoindol-1-yl)phosphine oxide (9a)**

Yield: 97% (0.43 g), yellow crystals; Mp: 168–170 °C;  $^1\text{H}$  NMR (CDCl<sub>3</sub>)  $\delta$  0.89 (t,  $J_{HH} = 7.3$ , 3H, CH<sub>3</sub>(CH<sub>2</sub>)<sub>3</sub>N), 1.14–1.30 (m, 2H, CH<sub>2</sub>(CH<sub>2</sub>)<sub>2</sub>N), 1.47–1.72 (m, 2H, CH<sub>2</sub>CH<sub>2</sub>N), 2.23 (s, 6H, C<sub>3</sub><sup>'</sup>CH<sub>3</sub><sup>I</sup>), 2.34 (s, 6H, C<sub>3</sub><sup>'</sup>CH<sub>3</sub><sup>II</sup>), 3.25–3.37 (m, 1H, CH<sub>A</sub>, CH<sub>2</sub>N), 3.90–4.04 (m, 1H, CH<sub>B</sub>, CH<sub>2</sub>N), 5.47 (d, 1H,  $^2J_{HP} = 10.9$ , C<sub>1</sub>H), 6.83–6.94 (m, 2H, ArH) 7.12–7.45, (m, 7H, ArH), 7.71 (d, 1H,  $J_{HH} = 7.4$ , ArH);  $^{13}\text{C}$  NMR (CDCl<sub>3</sub>)  $\delta$  13.8 (CH<sub>3</sub>(CH<sub>2</sub>)<sub>3</sub>N), 20.0 (CH<sub>2</sub>(CH<sub>2</sub>)<sub>2</sub>N), 21.2 (C<sub>3</sub><sup>'</sup>CH<sub>3</sub><sup>I</sup>), 21.3 (C<sub>3</sub><sup>'</sup>CH<sub>3</sub><sup>II</sup>), 30.2 (CH<sub>2</sub>CH<sub>2</sub>N), 41.8 (CH<sub>2</sub>N), 61.2 (d,  $^1J_{CP} = 71.8$ , C<sub>1</sub>), 123.5 (d,  $J_{CP} = 1.2$ , C<sub>4</sub>), 124.2 (d,  $^3J_{CP} = 2.3$ , C<sub>7</sub>), 127.2 (d,  $^1J_{CP} = 97.5$ , C<sub>1</sub><sup>'I</sup>), 128.6 (d,  $J_{CP} = 1.6$ , C<sub>5</sub>), 129.1 (d,  $^1J_{CP} = 97.0$ , C<sub>1</sub><sup>'II</sup>), 129.2 (d,  $^2J_{CP} = 9.0$ , C<sub>2</sub><sup>'I</sup>), 129.4 (d,  $^2J_{CP} = 8.9$ , C<sub>2</sub><sup>'II</sup>), 130.9 (d,  $J_{CP} = 2.2$ , C<sub>6</sub>), 133.2 (d,  $^3J_{CP} = 3.1$ , C<sub>3a</sub>), 134.46 (d,  $J_{CP} = 3.1$ , C<sub>4</sub><sup>'I</sup>), 134.54 (d,  $J_{CP} = 2.9$ , C<sub>4</sub><sup>'II</sup>), 138.3 (d,  $^3J_{CP} = 12.4$ , C<sub>3</sub><sup>'I</sup>), 138.5 (d,  $^3J_{CP} = 12.3$ , C<sub>3</sub><sup>'II</sup>), 138.9 (d,  $^2J_{CP} = 2.3$ , C<sub>7a</sub>), 168.6 (d,  $^3J_{CP} = 1.5$ , C<sub>3</sub>);  $^{31}\text{P}$  (CDCl<sub>3</sub>)  $\delta$  31.6;  $[\text{M}+\text{H}]^+$ <sub>found</sub> = 446.2237, C<sub>28</sub>H<sub>33</sub>NO<sub>2</sub>P requires 446.2248.

**Bis(3,5-dimethylphenyl) (2-cyclohexyl-3-oxo-2,3-dihydro-2*H*-isoindol-1-yl)phosphine oxide (9b)**

Yield: 96% (0.45 g), white crystals; Mp: 180–182 °C; <sup>1</sup>H NMR (CDCl<sub>3</sub>) δ 1.15–1.32 (m, 3H, <sup>c</sup>HexH), 1.51–1.67 (m, 2H, <sup>c</sup>HexH), 1.67–1.83 (m, 3H, <sup>c</sup>HexH), 2.04–2.22 [2.18 (s, C<sub>3</sub>''CH<sub>3</sub><sup>I</sup>), overlapped by the multiplet of <sup>c</sup>HexH total int. 7H], 2.35 (s, 6H, C<sub>3</sub>''CH<sub>3</sub><sup>II</sup>), 2.38–2.51 (m, 1H, <sup>c</sup>HexH), 3.62–3.76 (m, 1H, C<sub>1</sub>'H), 5.40 (d, 1H, <sup>2</sup>J<sub>HP</sub> = 11.3, C<sub>1</sub>H), 6.60 (d, 1H, J<sub>HH</sub> = 7.7, ArH), 6.77 (d, 2H, J<sub>HH</sub> = 11.3, ArH), 7.11 (s, 1H, ArH), 7.19–7.44 (m, 5H, ArH), 7.69 (d, 1H, J<sub>HH</sub> = 7.7, ArH); <sup>13</sup>C NMR (CDCl<sub>3</sub>) δ 21.1 (C<sub>3</sub>''CH<sub>3</sub><sup>I</sup>), 21.3 (C<sub>3</sub>''CH<sub>3</sub><sup>II</sup>), 25.2 (C<sub>4</sub>'), 26.0 (C<sub>3</sub>'<sup>I</sup>), 26.3 (C<sub>3</sub>'<sup>II</sup>), 29.2 (C<sub>2</sub>'<sup>I</sup>), 29.9 (C<sub>2</sub>'<sup>II</sup>), 57.4 (C<sub>1</sub>'), 63.4 (d, <sup>1</sup>J<sub>CP</sub> = 72.4, C<sub>1</sub>), 123.3 (d, J<sub>CP</sub> = 1.4, C<sub>4</sub>), 123.8 (d, <sup>3</sup>J<sub>CP</sub> = 2.2, C<sub>7</sub>), 126.0 (d, <sup>1</sup>J<sub>CP</sub> = 98.0, C<sub>1</sub>'<sup>II</sup>), 128.5 (d, J<sub>CP</sub> = 2.0, C<sub>5</sub>), 129.1 (d, <sup>2</sup>J<sub>CP</sub> = 9.0, C<sub>2</sub>'<sup>I</sup>), 129.9 (d, <sup>2</sup>J<sub>CP</sub> = 8.5, C<sub>2</sub>'<sup>II</sup>), 130.4 (d, <sup>1</sup>J<sub>CP</sub> = 96.3, C<sub>1</sub>'<sup>II</sup>), 130.7 (d, J<sub>CP</sub> = 2.3, C<sub>6</sub>), 134.32 (d, J<sub>CP</sub> = 3.0, C<sub>4</sub>'<sup>I</sup>), 134.34 (d, J<sub>CP</sub> = 2.9, C<sub>4</sub>'<sup>II</sup>), 134.6 (d, <sup>3</sup>J<sub>CP</sub> = 3.1, C<sub>3a</sub>), 137.8 (d, <sup>3</sup>J<sub>CP</sub> = 12.4, C<sub>3</sub>'<sup>I</sup>), 138.5 (d, <sup>3</sup>J<sub>CP</sub> = 12.3, C<sub>3</sub>'<sup>II</sup>), 139.1 (d, <sup>2</sup>J<sub>CP</sub> = 1.4, C<sub>7a</sub>), 168.9 (d, <sup>3</sup>J<sub>CP</sub> = 2.1, C<sub>3</sub>); <sup>31</sup>P (CDCl<sub>3</sub>) δ 31.7; [M+H]<sup>+</sup><sub>found</sub> = 472.2378, C<sub>30</sub>H<sub>35</sub>NO<sub>2</sub>P requires 472.2399.

**Bis(3,5-dimethylphenyl) (2-benzyl-3-oxo-2,3-dihydro-2*H*-isoindol-1-yl)phosphine oxide (9c)**

Yield: 97% (0.46 g), white crystals; Mp: 88–90 °C; <sup>1</sup>H NMR (CDCl<sub>3</sub>) δ 2.23 (s, 6H, C<sub>3</sub>''CH<sub>3</sub><sup>I</sup>), 2.31 (s, 6H, C<sub>3</sub>''CH<sub>3</sub><sup>II</sup>), 4.35 (d, 1H, J<sub>HH</sub> = 15.1, CH<sub>A</sub>, CH<sub>2</sub>N), 5.29 (d, 1H, <sup>2</sup>J<sub>HP</sub> = 10.0, C<sub>1</sub>H), 5.39 (d, 1H, J<sub>HH</sub> = 15.1, CH<sub>B</sub>, CH<sub>2</sub>N), 6.83 (d, 1H, J<sub>HH</sub> = 7.7, ArH), 6.91 (d, 2H, J<sub>HH</sub> = 11.5, ArH), 7.07–7.46 (m, 11H, ArH), 7.77 (d, 1H, J<sub>HH</sub> = 7.5, ArH); <sup>13</sup>C NMR (CDCl<sub>3</sub>) δ 21.2 (C<sub>3</sub>''CH<sub>3</sub><sup>I</sup>), 21.3 (C<sub>3</sub>''CH<sub>3</sub><sup>II</sup>), 45.2 (CH<sub>2</sub>N), 60.1 (d, <sup>1</sup>J<sub>CP</sub> = 71.7, C<sub>1</sub>), 123.8 (d, J<sub>CP</sub> = 1.2, C<sub>4</sub>), 124.2 (d, <sup>3</sup>J<sub>CP</sub> = 2.1, C<sub>7</sub>), 127.39 (d, <sup>1</sup>J<sub>CP</sub> = 97.6, C<sub>1</sub>'<sup>I</sup>), 127.44 (C<sub>4</sub>'), 128.2 (C<sub>3</sub>'), 128.56 (d, J<sub>CP</sub> = 2.0, C<sub>5</sub>), 128.58 (C<sub>2</sub>'), 129.0 (d, <sup>1</sup>J<sub>CP</sub> = 96.9, C<sub>1</sub>'<sup>II</sup>), 129.1 (d, <sup>2</sup>J<sub>CP</sub> = 8.9, C<sub>2</sub>'<sup>I</sup>), 129.5 (d, <sup>2</sup>J<sub>CP</sub> = 8.9, C<sub>2</sub>'<sup>II</sup>), 131.1 (d, J<sub>CP</sub> = 1.8, C<sub>6</sub>), 132.7 (d, <sup>3</sup>J<sub>CP</sub> = 2.8, C<sub>3a</sub>), 134.4 (d, J<sub>CP</sub> = 3.0, C<sub>4</sub>'<sup>I</sup>), 134.5 (d, J<sub>CP</sub> = 2.9, C<sub>4</sub>'<sup>II</sup>), 136.8 (C<sub>1</sub>'), 138.3 (d, <sup>3</sup>J<sub>CP</sub> = 12.5, C<sub>3</sub>'<sup>I</sup>), 138.5 (d, <sup>3</sup>J<sub>CP</sub> = 12.4, C<sub>3</sub>'<sup>II</sup>), 139.1 (d, <sup>2</sup>J<sub>CP</sub> = 2.2, C<sub>7a</sub>), 168.8 (d, <sup>3</sup>J<sub>CP</sub> = 1.5, C<sub>3</sub>); <sup>31</sup>P (CDCl<sub>3</sub>) δ 31.3; [M+H]<sup>+</sup><sub>found</sub> = 480.2086, C<sub>31</sub>H<sub>31</sub>NO<sub>2</sub>P requires 480.2092.

**Bis(3,5-dimethylphenyl) (2-phenyl-3-oxo-2,3-dihydro-2*H*-isoindol-1-yl)phosphine oxide (9d)**

Yield: 97% (0.45 g), white crystals; Mp: 200–202 °C; <sup>1</sup>H NMR (CDCl<sub>3</sub>) δ 2.09 (s, 6H, C<sub>3</sub>''CH<sub>3</sub><sup>I</sup>), 2.31 (s, 6H, C<sub>3</sub>''CH<sub>3</sub><sup>II</sup>), 6.41 (dd, 1H, <sup>2</sup>J<sub>HP</sub> = 10.6, J<sub>HH</sub> = 6.4, C<sub>1</sub>H), 6.49 (t, 1H, J<sub>HH</sub> = 7.1, ArH), 6.81 (t, 3H, J<sub>HH</sub> = 9.8, ArH), 6.92–7.03 (m, 3H, ArH), 7.18–7.31 (m, 3H, ArH), 7.46–7.59 (m, 3H, ArH), 7.65 (d, 1H, J<sub>HH</sub> = 7.8, ArH), 7.87 (d, 1H, J<sub>HH</sub> = 7.9, ArH);

$^{13}\text{C}$  NMR ( $\text{CDCl}_3$ )  $\delta$  21.2 ( $\text{C}_3''\text{CH}_3^{\text{I}}$ ), 21.5 ( $\text{C}_3''\text{CH}_3^{\text{II}}$ ), 50.8 (d,  $^1J_{\text{CP}} = 75.6$ ,  $\text{C}_1$ ), 113.9 (d,  $J_{\text{CP}} = 2.6$ ,  $\text{C}_4$ ), 117.5 (d,  $^3J_{\text{CP}} = 1.2$ ,  $\text{C}_7$ ), 127.5 (d,  $J_{\text{CP}} = 2.5$ ,  $\text{C}_5$ ), 128.90 (d,  $^2J_{\text{CP}} = 9.0$ ,  $\text{C}_2''^{\text{I}}$ ), 128.92 (d,  $^2J_{\text{CP}} = 9.0$ ,  $\text{C}_2''^{\text{II}}$ ), 129.3 ( $\text{C}_4'$ ), 129.6 (d,  $J_{\text{CP}} = 4.8$ ,  $\text{C}_3'$ ), 129.9 (d,  $J_{\text{CP}} = 4.9$ ,  $\text{C}_2'$ ), 130.7 (d,  $J_{\text{CP}} = 1.3$ ,  $\text{C}_6$ ), 131.1 (d,  $^1J_{\text{CP}} = 97.3$ ,  $\text{C}_1''^{\text{I}}$ ), 131.9 (d,  $^1J_{\text{CP}} = 95.3$ ,  $\text{C}_1''^{\text{II}}$ ), 132.5 (d,  $^3J_{\text{CP}} = 2.4$ ,  $\text{C}_{3a}$ ), 133.4 (d,  $J_{\text{CP}} = 2.6$ ,  $\text{C}_4''^{\text{I}}$ ), 134.0 (d,  $J_{\text{CP}} = 2.9$ ,  $\text{C}_4''^{\text{II}}$ ), 137.4 (d,  $^3J_{\text{CP}} = 12.1$ ,  $\text{C}_3''^{\text{I}}$ ), 138.4 (d,  $^3J_{\text{CP}} = 12.0$ ,  $\text{C}_3''^{\text{II}}$ ), 140.1 ( $\text{C}_{7a}$ ), 147.6 (d,  $^3J_{\text{CP}} = 11.5$ ,  $\text{C}_1'$ ), 169.3 (d,  $^3J_{\text{CP}} = 1.1$ ,  $\text{C}_3$ );  $^{31}\text{P}$  ( $\text{CDCl}_3$ )  $\delta$  32.2;  $[\text{M}+\text{H}]^+_{\text{found}} = 466.1949$ ,  $\text{C}_{30}\text{H}_{29}\text{NO}_2\text{P}$  requires 466.1930.

### **Bis(2-naphthyl) (2-butyl-3-oxo-2,3-dihydro-2H-isoindol-1-yl)phosphine oxide (10a)**

Yield: 96% (0.47 g), light yellow crystals; Mp: 105–107 °C;  $^1\text{H}$  NMR ( $\text{CDCl}_3$ )  $\delta$  0.81 (t, 3H,  $J_{\text{HH}} = 7.4$ ,  $\text{CH}_3(\text{CH}_2)_3\text{N}$ ), 1.07–1.23 (m, 2H,  $\text{CH}_2(\text{CH}_2)_2\text{N}$ ), 1.52–1.71 (m, 2H,  $\text{CH}_2\text{CH}_2\text{N}$ ), 3.30–3.39 (m, 1H,  $\text{CH}_A$ ,  $\text{CH}_2\text{N}$ ), 3.94–4.03 (m, 1H,  $\text{CH}_B$ ,  $\text{CH}_2\text{N}$ ), 5.68 (d, 1H,  $^2J_{\text{HP}} = 11.1$ ,  $\text{C}_1\text{H}$ ), 6.95 (d, 1H,  $J_{\text{HH}} = 7.7$ , ArH), 7.20 (t, 1H,  $J_{\text{HH}} = 8.8$ , ArH), 7.25–7.31 (m, 1H, ArH), 7.37 (t, 1H,  $J_{\text{HH}} = 7.5$ , ArH), 7.52–7.66 (m, 4H, ArH), 7.67 (d, 1H,  $J_{\text{HH}} = 7.5$ , ArH), 7.72 (t, 2H,  $J_{\text{HH}} = 8.7$ , ArH), 7.76–7.83 (m, 2H, ArH), 7.86 (d, 2H,  $J_{\text{HH}} = 8.2$ , ArH), 7.90 (d, 1H,  $J_{\text{HH}} = 8.2$ , ArH), 7.95 (dd, 1H,  $J_{\text{HH}} = 8.5$ ,  $J_{\text{HH}} = 3.1$ , ArH), 8.15 (d, 1H,  $J_{\text{HH}} = 13.5$ , ArH), 8.29 (d, 1H,  $J_{\text{HH}} = 13.4$ , ArH);  $^{13}\text{C}$  NMR ( $\text{CDCl}_3$ )  $\delta$  13.6 ( $\text{CH}_3(\text{CH}_2)_3\text{N}$ ), 19.9 ( $\text{CH}_2(\text{CH}_2)_2\text{N}$ ), 30.1 ( $\text{CH}_2\text{CH}_2\text{N}$ ), 41.9 ( $\text{CH}_2\text{N}$ ), 61.2 (d,  $^1J_{\text{CP}} = 73.0$ ,  $\text{C}_1$ ), 123.8 (d,  $J_{\text{CP}} = 1.2$ ,  $\text{C}_4$ ), 124.1 (d,  $^3J_{\text{CP}} = 2.3$ ,  $\text{C}_7$ ), 124.9 (d,  $^1J_{\text{CP}} = 98.4$ ,  $\text{C}_2'^{\text{I}}$ ), 125.7 (d,  $J_{\text{CP}} = 9.9$ ,  $\text{C}'^{\text{I}}$ ), 125.9 (d,  $J_{\text{CP}} = 10.0$ ,  $\text{C}'^{\text{II}}$ ), 126.3 (d,  $^1J_{\text{CP}} = 98.1$ ,  $\text{C}_2''^{\text{II}}$ ), 127.2 ( $\text{C}'^{\text{I}}$ ), 127.3 ( $\text{C}'^{\text{II}}$ ), 127.8 ( $\text{C}'^{\text{I}}$ ), 127.9 ( $\text{C}'^{\text{II}}$ ), 128.4 (d,  $J_{\text{CP}} = 11.5$ ,  $\text{C}'^{\text{I}}$ ), 128.6 (d,  $J_{\text{CP}} = 11.5$ ,  $\text{C}'^{\text{II}}$ ), 128.7 ( $\text{C}'^{\text{I}}$ ), 128.75 (d,  $J_{\text{CP}} = 1.0$ ,  $\text{C}_5$ ), 128.77 ( $\text{C}'^{\text{II}}$ ), 128.9 ( $\text{C}'^{\text{I}}$ ), 129.0 ( $\text{C}'^{\text{II}}$ ), 131.2 (d,  $J_{\text{CP}} = 2.3$ ,  $\text{C}_6$ ), 132.35 (d,  $^2J_{\text{CP}} = 12.9$ ,  $\text{C}'^{\text{I}}$ ), 132.39 (d,  $^2J_{\text{CP}} = 13.0$ ,  $\text{C}'^{\text{II}}$ ), 132.9 (d,  $^3J_{\text{CP}} = 3.1$ ,  $\text{C}_{3a}$ ), 134.2 (d,  $^2J_{\text{CP}} = 8.5$ ,  $\text{C}'^{\text{I}}$ ), 134.7 (d,  $^2J_{\text{CP}} = 8.5$ ,  $\text{C}'^{\text{II}}$ ), 134.95 (d,  $J_{\text{CP}} = 2.3$ ,  $\text{C}'^{\text{I}}$ ), 135.02 (d,  $J_{\text{CP}} = 2.5$ ,  $\text{C}'^{\text{II}}$ ), 138.7 (d,  $^2J_{\text{CP}} = 2.4$ ,  $\text{C}_{7a}$ ), 168.6 (d,  $^3J_{\text{CP}} = 1.6$ ,  $\text{C}_3$ );  $^{31}\text{P}$  ( $\text{CDCl}_3$ )  $\delta$  31.2;  $[\text{M}+\text{H}]^+_{\text{found}} = 490.1930$ ,  $\text{C}_{32}\text{H}_{29}\text{NO}_2\text{P}$  requires 490.1930.

### **Bis(2-naphthyl) (2-cyclohexyl-3-oxo-2,3-dihydro-2H-isoindol-1-yl)phosphine oxide (10b)**

Yield: 95% (0.49 g), light yellow crystals; Mp: 208–210 °C;  $^1\text{H}$  NMR ( $\text{CDCl}_3$ )  $\delta$  0.79–1.08 (m, 1H,  $^{\text{c}}\text{HexH}$ ), 1.13–1.37 (m, 2H,  $^{\text{c}}\text{HexH}$ ), 1.48–1.61 (m, 1H,  $^{\text{c}}\text{HexH}$ ), 1.61–1.90 (m, 4H,  $^{\text{c}}\text{HexH}$ ), 2.09–2.26 (m, 1H,  $^{\text{c}}\text{HexH}$ ), 2.38–2.57 (m, 1H,  $^{\text{c}}\text{HexH}$ ), 3.71–3.89 (m, 1H,  $\text{C}_1'\text{H}$ ),

5.64 (d, 1H,  $^2J_{\text{HP}} = 11.5$ , C<sub>1</sub>H), 6.66 (d, 1H,  $J_{\text{HH}} = 7.7$ , ArH), 7.10 (t, 1H,  $J_{\text{HH}} = 8.8$ , ArH), 7.19–7.32 (m, 1H, ArH), 7.41 (t, 1H,  $J_{\text{HH}} = 7.6$ , ArH), 7.51–7.73 (m, 5H, ArH), 7.73–7.82 (m, 2H, ArH), 7.82–7.92 (m, 2H, ArH), 7.95 (d, 1H,  $J_{\text{HH}} = 8.2$ , ArH), 7.97–8.07 (m, 2H, ArH), 8.32 (d, 1H,  $J_{\text{HH}} = 13.3$ , ArH);  $^{13}\text{C}$  NMR (CDCl<sub>3</sub>)  $\delta$  25.2 (C<sub>4</sub>'), 26.0 (C<sub>3</sub>'<sup>I</sup>), 26.2 (C<sub>3</sub>'<sup>II</sup>), 29.3 (C<sub>2</sub>'<sup>I</sup>), 30.1 (C<sub>2</sub>'<sup>II</sup>), 57.7 (C<sub>1</sub>'), 63.5 (d,  $^1J_{\text{CP}} = 73.5$ , C<sub>1</sub>), 123.6 (d,  $^1J_{\text{CP}} = 92.0$ , C<sub>1</sub>'<sup>I</sup>), 123.7 (d,  $J_{\text{CP}} = 1.8$ , C<sub>4</sub>), 123.8 (d,  $^3J_{\text{CP}} = 2.4$ , C<sub>7</sub>), 126.1 (d,  $J_{\text{CP}} = 9.8$ , C''<sup>I</sup>), 126.3 (d,  $J_{\text{CP}} = 9.4$ , C''<sup>II</sup>), 127.1 (C''<sup>I</sup>), 127.4 (C''<sup>II</sup>), 127.7 (d,  $J_{\text{CP}} = 97.6$ , C<sub>2</sub>'<sup>II</sup>), 128.1 (d,  $J_{\text{CP}} = 11.6$ , C''<sup>I</sup>), 128.76 (d,  $J_{\text{CP}} = 11.2$ , C''<sup>II</sup>), 128.78 (C''<sup>I</sup>), 128.84 (d,  $J_{\text{CP}} = 1.8$ , C<sub>5</sub>), 128.96 (C''<sup>II</sup>), 128.99 (C''<sup>I</sup>), 129.1 (C''<sup>II</sup>), 131.1 (d,  $J_{\text{CP}} = 2.3$ , C<sub>6</sub>), 132.3 (d,  $J_{\text{CP}} = 12.9$ , C''<sup>I</sup>), 132.5 (d,  $J_{\text{CP}} = 12.8$ , C''<sup>II</sup>), 134.0 (d,  $J_{\text{CP}} = 8.8$ , C''<sup>I</sup>), 134.6 (d,  $^3J_{\text{CP}} = 3.0$ , C<sub>3a</sub>), 135.02 (d,  $J_{\text{CP}} = 2.1$ , C''<sup>I</sup>), 135.04 (d,  $J_{\text{CP}} = 2.2$ , C''<sup>II</sup>), 135.3 (d,  $J_{\text{CP}} = 7.8$ , C''<sup>II</sup>), 138.9 (d,  $^2J_{\text{CP}} = 1.3$ , C<sub>7a</sub>), 169.0 (d,  $^3J_{\text{CP}} = 2.0$ , C<sub>3</sub>);  $^{31}\text{P}$  (CDCl<sub>3</sub>)  $\delta$  31.4;  $[\text{M}+\text{H}]^+$ <sub>found</sub> = 516.2104, C<sub>34</sub>H<sub>31</sub>NO<sub>2</sub>P requires 516.2086.

#### **Bis(2-naphthyl) (2-benzyl-3-oxo-2,3-dihydro-2H-isoindol-1-yl)phosphine oxide (10c)**

Yield: 97% (0.51 g), light yellow crystals; Mp: 174–176 °C;  $^1\text{H}$  NMR (CDCl<sub>3</sub>)  $\delta$  4.48 (d, 1H,  $J_{\text{HH}} = 15.0$ , CH<sub>A</sub>, CH<sub>2</sub>N), 5.44 (d, 1H,  $J_{\text{HH}} = 15.0$ , CH<sub>B</sub>, CH<sub>2</sub>N), 5.53 (d, 1H,  $^2J_{\text{HP}} = 10.4$ , C<sub>1</sub>H), 6.90 (d, 1H,  $J_{\text{HH}} = 7.7$ , ArH), 7.11–7.22 (m, 3H, ArH), 7.23–7.34 (m, 4H, ArH), 7.41 (t, 2H,  $J_{\text{HH}} = 7.5$ , ArH), 7.53–8.01 (m, 12H, ArH), 8.20 (d, 1H,  $J_{\text{HH}} = 13.4$ , ArH), 8.27 (d, 1H,  $J_{\text{HH}} = 13.4$ , ArH);  $^{13}\text{C}$  NMR (CDCl<sub>3</sub>)  $\delta$  45.5 (CH<sub>2</sub>N), 60.4 (d,  $^1J_{\text{CP}} = 73.4$ , C<sub>1</sub>), 124.25 (d,  $^3J_{\text{CP}} = 1.6$ , C<sub>7</sub>), 124.28 (d,  $J_{\text{CP}} = 0.5$ , C<sub>4</sub>), 125.0 (d,  $^1J_{\text{CP}} = 98.6$ , C<sub>2</sub>'<sup>I</sup>), 125.96 (d,  $J_{\text{CP}} = 9.9$ , C''<sup>I</sup>), 126.00 (d,  $J_{\text{CP}} = 9.6$ , C''<sup>II</sup>), 127.27 (C''<sup>I</sup>), 127.33 (C''<sup>II</sup>), 127.7 (C<sub>4</sub>'), 127.8 (d,  $^1J_{\text{CP}} = 92.1$ , C<sub>2</sub>'<sup>II</sup>), 127.9 (C''<sup>I</sup>), 128.0 (C''<sup>II</sup>), 128.40 (C<sub>2</sub>'), 128.42 (d,  $J_{\text{CP}} = 11.8$ , C''<sup>I</sup>), 128.71 (d,  $J_{\text{CP}} = 11.8$ , C''<sup>II</sup>), 128.74 (C<sub>3</sub>'), 128.78 (C''<sup>I</sup>), 128.80 (C''<sup>II</sup>), 128.86 (C''<sup>I</sup>), 128.88 (C''<sup>II</sup>), 129.1 (d,  $J_{\text{CP}} = 1.0$ , C<sub>5</sub>), 131.5 (d,  $J_{\text{CP}} = 2.0$ , C<sub>6</sub>), 132.4 (d,  $J_{\text{CP}} = 12.9$ , C''<sup>I</sup>), 132.5 (d,  $J_{\text{CP}} = 13.1$ , C''<sup>II</sup>), 132.6 (d,  $^3J_{\text{CP}} = 3.0$ , C<sub>3a</sub>), 134.2 (d,  $J_{\text{CP}} = 8.6$ , C''<sup>I</sup>), 135.0 (d,  $J_{\text{CP}} = 2.5$ , C''<sup>I</sup>), 135.06 (d,  $J_{\text{CP}} = 8.3$ , C''<sup>II</sup>), 135.13 (d,  $J_{\text{CP}} = 2.5$ , C''<sup>II</sup>), 136.7 (C<sub>1</sub>'), 139.0 (d,  $^2J_{\text{CP}} = 2.3$ , C<sub>7a</sub>), 167.0 (d,  $^3J_{\text{CP}} = 2.0$ , C<sub>3</sub>);  $^{31}\text{P}$  (CDCl<sub>3</sub>)  $\delta$  31.1;  $[\text{M}+\text{H}]^+$ <sub>found</sub> = 524.1793, C<sub>35</sub>H<sub>27</sub>NO<sub>2</sub>P requires 524.1773.

#### **Dibenzyl (2-butyl-3-oxo-2,3-dihydro-2H-isoindol-1-yl)phosphine oxide (11a)**

Yield: 96% (0.40 g), colourless oil;  $^1\text{H}$  NMR (CDCl<sub>3</sub>)  $\delta$  0.85 (t,  $J_{\text{HH}} = 7.3$ , 3H, CH<sub>3</sub>(CH<sub>2</sub>)<sub>3</sub>N), 1.13–1.30 (m, 2H, CH<sub>2</sub>(CH<sub>2</sub>)<sub>2</sub>N), 1.36–1.55 (m, 2H, CH<sub>2</sub>CH<sub>2</sub>N), 2.71–2.95 (m, 2H, CH<sub>2</sub>P<sup>I</sup>), 3.00–3.19 (m, 2H, CH<sub>2</sub>P<sup>II</sup>), 3.47–3.59 (m, 1H, CH<sub>A</sub>, CH<sub>2</sub>N), 3.98–4.11 (m, 1H, CH<sub>B</sub>, CH<sub>2</sub>N),

4.96 (d, 1H,  $^2J_{\text{HP}} = 8.9$ , C<sub>1</sub>H), 7.03–7.13 (m, 2H, ArH), 7.17–7.32 (m, 8H, ArH), 7.49–7.64 (m, 2H, ArH), 7.71 (d, 1H,  $J_{\text{HH}} = 7.4$ , ArH), 7.89 (d, 1H,  $J_{\text{HH}} = 7.2$ , ArH);  $^{13}\text{C}$  NMR (CDCl<sub>3</sub>)  $\delta$  13.7 (CH<sub>3</sub>(CH<sub>2</sub>)<sub>3</sub>N), 19.9 (CH<sub>2</sub>(CH<sub>2</sub>)<sub>2</sub>N), 30.0 (CH<sub>2</sub>CH<sub>2</sub>N), 33.5 (d,  $^1J_{\text{CP}} = 60.1$ , CH<sub>2</sub>P<sup>I</sup>), 33.8 (d,  $^1J_{\text{CP}} = 59.0$ , CH<sub>2</sub>P<sup>II</sup>), 42.3 (CH<sub>2</sub>N), 58.4 (d,  $^1J_{\text{CP}} = 65.0$ , C<sub>1</sub>), 123.8 (d,  $J_{\text{CP}} = 2.2$ , C<sub>4</sub>), 124.4 (d,  $^3J_{\text{CP}} = 1.3$ , C<sub>7</sub>), 127.17 (d,  $J_{\text{CP}} = 2.7$ , C<sub>4</sub><sup>I</sup>), 127.24 (d,  $J_{\text{CP}} = 2.5$ , C<sub>4</sub><sup>II</sup>), 128.76 (d,  $J_{\text{CP}} = 12.1$ , C<sub>3</sub><sup>I</sup>), 128.79 (d,  $J_{\text{CP}} = 12.1$ , C<sub>3</sub><sup>II</sup>), 129.0 (d,  $J_{\text{CP}} = 1.9$ , C<sub>5</sub>), 129.7 (d,  $^3J_{\text{CP}} = 7.7$ , C<sub>2</sub><sup>I</sup>), 129.8 (d,  $^3J_{\text{CP}} = 7.6$ , C<sub>2</sub><sup>II</sup>), 130.1 (d,  $^2J_{\text{CP}} = 11.4$ , C<sub>1</sub><sup>I</sup>), 130.2 (d,  $^2J_{\text{CP}} = 11.4$ , C<sub>1</sub><sup>II</sup>), 131.7 (d,  $J_{\text{CP}} = 2.1$ , C<sub>6</sub>), 132.7 (d,  $^3J_{\text{CP}} = 2.8$ , C<sub>3a</sub>), 138.8 (d,  $^2J_{\text{CP}} = 2.0$ , C<sub>7a</sub>), 168.7 (d,  $^3J_{\text{CP}} = 2.0$ , C<sub>3</sub>);  $^{31}\text{P}$  (CDCl<sub>3</sub>)  $\delta$  41.7; [M+H]<sup>+</sup><sub>found</sub> = 418.1942, C<sub>26</sub>H<sub>29</sub>NO<sub>2</sub>P requires 418.1936.

### Dibenzyl (2-cyclohexyl-3-oxo-2,3-dihydro-2H-isoindol-1-yl)phosphine oxide (11b)

Yield: 94% (0.42 g), white crystals; Mp: 64–65 °C;  $^1\text{H}$  NMR (CDCl<sub>3</sub>)  $\delta$  1.16–1.45 (m, 3H, <sup>c</sup>HexH), 1.52–1.69 (m, 2H, <sup>e</sup>HexH), 1.70–2.07 (m, 3H, <sup>e</sup>HexH), 2.11–2.30 (m, 1H, <sup>e</sup>HexH), 2.46–2.72 (m, 2H, <sup>e</sup>HexH, CH<sub>A</sub>, CH<sub>2</sub>P<sup>I</sup>), 2.81–3.00 (m, 1H, CH<sub>B</sub>, CH<sub>2</sub>P<sup>I</sup>), 3.02–3.24 (m, 2H, CH<sub>2</sub>P<sup>II</sup>), 3.60–3.76 (m, C<sub>1</sub><sup>I</sup>H), 4.94 (d, 1H,  $^2J_{\text{HP}} = 8.9$ , C<sub>1</sub>H), 6.97–7.09 (m, 2H, ArH), 7.17–7.32 (m, 8H, ArH), 7.47–7.63 (m, 2H, ArH), 7.68 (d, 1H,  $J_{\text{HH}} = 7.5$ , ArH), 7.87 (d, 1H,  $J_{\text{HH}} = 7.0$ , ArH);  $^{13}\text{C}$  NMR (CDCl<sub>3</sub>)  $\delta$  25.1 (C<sub>4</sub><sup>I</sup>), 25.9 (C<sub>3</sub><sup>I</sup>), 26.3 (C<sub>3</sub><sup>II</sup>), 28.8 (C<sub>2</sub><sup>I</sup>), 30.0 (C<sub>2</sub><sup>II</sup>), 32.7 (d,  $^1J_{\text{CP}} = 60.6$ , CH<sub>2</sub>P<sup>I</sup>), 33.3 (d,  $^1J_{\text{CP}} = 59.3$ , CH<sub>2</sub>P<sup>II</sup>), 57.9 (C<sub>1</sub><sup>I</sup>), 60.9 (d,  $^1J_{\text{CP}} = 64.7$ , C<sub>1</sub>), 123.5 (d,  $J_{\text{CP}} = 2.2$ , C<sub>4</sub>), 124.2 (d,  $J_{\text{CP}} = 1.2$ , C<sub>7</sub>), 127.1 (d,  $J_{\text{CP}} = 2.7$ , C<sub>4</sub><sup>II</sup>), 127.2 (d,  $J_{\text{CP}} = 2.5$ , C<sub>4</sub><sup>III</sup>), 128.75 (d,  $J_{\text{CP}} = 13.6$ , C<sub>3</sub><sup>III</sup>), 128.78 (d,  $J_{\text{CP}} = 13.5$ , C<sub>3</sub><sup>III</sup>), 129.0 (d,  $J_{\text{CP}} = 1.9$ , C<sub>5</sub>), 129.83 (d,  $^3J_{\text{CP}} = 5.5$ , C<sub>2</sub><sup>III</sup>), 129.84 (d,  $^3J_{\text{CP}} = 5.6$ , C<sub>2</sub><sup>III</sup>), 130.2 (d,  $^2J_{\text{CP}} = 10.7$ , C<sub>1</sub><sup>III</sup>), 130.3 (d,  $^2J_{\text{CP}} = 10.7$ , C<sub>1</sub><sup>III</sup>), 131.6 (d,  $J_{\text{CP}} = 2.2$ , C<sub>6</sub>), 134.1 (d,  $^3J_{\text{CP}} = 3.0$ , C<sub>3a</sub>), 139.1 (d,  $^2J_{\text{CP}} = 1.4$ , C<sub>7a</sub>), 169.2 (d,  $^3J_{\text{CP}} = 2.2$ , C<sub>3</sub>);  $^{31}\text{P}$  (CDCl<sub>3</sub>)  $\delta$  41.4; [M+H]<sup>+</sup><sub>found</sub> = 444.2098, C<sub>28</sub>H<sub>31</sub>NO<sub>2</sub>P requires 444.2092.

### Dibenzyl (2-benzyl-3-oxo-2,3-dihydro-2H-isoindol-1-yl)phosphine oxide (11c)

Yield: 96% (0.43 g), white crystals; Mp: 68–70 °C;  $^1\text{H}$  NMR (CDCl<sub>3</sub>)  $\delta$  2.54–2.68 (m, 1H, CH<sub>A</sub>, CH<sub>2</sub>P<sup>I</sup>), 2.77–2.91 (m, 1H, CH<sub>B</sub>, CH<sub>2</sub>P<sup>I</sup>), 3.07–3.23 (m, 2H, CH<sub>2</sub>P<sup>II</sup>), 4.77 (d, 1H,  $J_{\text{HH}} = 14.7$ , CH<sub>A</sub>, CH<sub>2</sub>N), 4.79 (d, 1H,  $^2J_{\text{HP}} = 8.8$ , C<sub>1</sub>H), ), 5.34 (d, 1H,  $J_{\text{HH}} = 14.6$ , CH<sub>B</sub>, CH<sub>2</sub>N), 6.95–7.04 (m, 2H, ArH), 7.13–7.31 (m, 13H, ArH), 7.51–7.60 (m, 3H, ArH), 7.94 (d, 1H,  $J_{\text{HH}} = 6.3$ , ArH);  $^{13}\text{C}$  NMR (CDCl<sub>3</sub>)  $\delta$  33.0 (d,  $^1J_{\text{CP}} = 60.3$ , CH<sub>2</sub>P<sup>I</sup>), 34.4 (d,  $^1J_{\text{CP}} = 58.4$ , CH<sub>2</sub>P<sup>II</sup>), 45.9 (CH<sub>2</sub>N), 57.5 (d,  $^1J_{\text{CP}} = 65.3$ , C<sub>1</sub>), 123.2 (d,  $J_{\text{CP}} = 2.1$ , C<sub>4</sub>), 124.9 (d,  $J_{\text{CP}} = 1.1$ ,

C<sub>7</sub>), 127.1 (d,  $J_{CP} = 2.5$ , C<sub>4</sub><sup>III</sup>), 127.3 (d,  $J_{CP} = 2.5$ , C<sub>4</sub><sup>II</sup>), 127.5 (C<sub>4</sub><sup>I</sup>), 128.6 (C<sub>3</sub><sup>I</sup>), 128.75 (d,  $J_{CP} = 16.0$ , C<sub>3</sub><sup>II</sup>), 128.77 (d,  $J_{CP} = 15.8$ , C<sub>3</sub><sup>III</sup>), 128.8 (C<sub>2</sub><sup>I</sup>), 129.0 (d,  $J_{CP} = 1.9$ , C<sub>5</sub>), 129.71 (d,  $^3J_{CP} = 5.5$ , C<sub>2</sub><sup>II</sup>), 129.8 (d,  $^3J_{CP} = 5.4$ , C<sub>2</sub><sup>III</sup>), 129.9 (d,  $^2J_{CP} = 17.8$ , C<sub>1</sub><sup>II</sup>), 130.0 (d,  $^2J_{CP} = 17.6$ , C<sub>1</sub><sup>III</sup>), 131.9 (d,  $J_{CP} = 2.2$ , C<sub>6</sub>), 132.5 (d,  $^3J_{CP} = 2.8$ , C<sub>3a</sub>), 136.6 (C<sub>1</sub><sup>I</sup>), 139.0 (d,  $^2J_{CP} = 2.0$ , C<sub>7a</sub>), 168.6 (d,  $^3J_{CP} = 2.2$ , C<sub>3</sub>); <sup>31</sup>P (CDCl<sub>3</sub>) δ 41.5; [M+H]<sup>+</sup><sub>found</sub> = 452.1783, C<sub>29</sub>H<sub>27</sub>NO<sub>2</sub>P requires 452.1779.

***tert*-Butyl(phenyl) (2-butyl-3-oxo-2,3-dihydro-2*H*-isoindol-1-yl)phosphine oxide (12)**

Yield: 94% (0.44 g), *dr*: 40:60, colourless oil; characterized as a mixture, **Isomer A**: <sup>1</sup>H NMR (CDCl<sub>3</sub>) δ 0.78 (t,  $J_{HH} = 7.3$ , 3H, CH<sub>3</sub>(CH<sub>2</sub>)<sub>3</sub>N), 1.00-1.27 [1.22 (d,  $^3J_{HP} = 14.9$ , C(CH<sub>3</sub>)<sub>3</sub>) overlapped by the multiplet of CH<sub>2</sub>(CH<sub>2</sub>)<sub>2</sub>N, total int. 11H], 1.27–1.43 (m, 2H, CH<sub>2</sub>CH<sub>2</sub>N), 3.27–3.38 (m, 1H, CH<sub>A</sub>, CH<sub>2</sub>N), 3.87–4.01 (m, 1H, CH<sub>B</sub>, CH<sub>2</sub>N), 5.27 (d, 1H,  $^2J_{HP} = 11.0$ , C<sub>1</sub>H), 6.97 (d, 1H,  $J_{HH} = 7.4$ , ArH), 7.31–7.43 (m, 2H, ArH), 7.44–7.63 (m, 2H, ArH), 7.77–7.88 (m, 2H, ArH); <sup>13</sup>C NMR (CDCl<sub>3</sub>) δ 13.7 (CH<sub>3</sub>(CH<sub>2</sub>)<sub>3</sub>N), 19.9 (CH<sub>2</sub>(CH<sub>2</sub>)<sub>2</sub>N), 26.0 (C(CH<sub>3</sub>)<sub>3</sub>), 29.6 (CH<sub>2</sub>CH<sub>2</sub>N), 35.3 (d,  $^1J_{P-C} = 62.0$ , C(CH<sub>3</sub>)<sub>3</sub>), 42.4 (CH<sub>2</sub>N), 61.8 (d,  $^1J_{CP} = 60.0$ , C<sub>1</sub>), 124.1 (d,  $J_{CP} = 1.1$ , C<sub>4</sub>), 125.3 (d,  $^3J_{CP} = 1.8$ , C<sub>7</sub>), 128.4 (d,  $^3J_{CP} = 10.7$ , C<sub>3</sub><sup>I</sup>), 129.0 (d,  $J_{CP} = 1.5$ , C<sub>5</sub>), 131.1 (d,  $J_{CP} = 2.0$ , C<sub>6</sub>), 131.9 (d,  $^2J_{CP} = 8.1$ , C<sub>2</sub><sup>I</sup>), 132.35 (d,  $J_{CP} = 2.0$ , C<sub>4</sub><sup>I</sup>), 132.39 (d,  $J_{CP} = 2.7$ , C<sub>3a</sub>), 132.9 (d,  $^1J_{CP} = 39.1$ , C<sub>1</sub><sup>I</sup>), 140.0 (d,  $^2J_{CP} = 2.1$ , C<sub>7a</sub>), 169.5 (d,  $^3J_{CP} = 1.3$ , C<sub>3</sub>); <sup>31</sup>P (CDCl<sub>3</sub>) δ 45.8; **Isomer B**: <sup>1</sup>H NMR (CDCl<sub>3</sub>) δ 0.94 (t,  $J_{HH} = 7.2$ , 3H, CH<sub>3</sub>(CH<sub>2</sub>)<sub>3</sub>N), 1.14 (d, 9H,  $^3J_{HP} = 15.0$ , C(CH<sub>3</sub>)<sub>3</sub>), 1.27–1.43 (m, 2H, CH<sub>2</sub>(CH<sub>2</sub>)<sub>2</sub>N), 1.60–1.77 (m, 2H, CH<sub>2</sub>CH<sub>2</sub>N), 3.87–4.01 (m, 1H, CH<sub>A</sub>, CH<sub>2</sub>N), 4.23–4.36 (m, 1H, CH<sub>B</sub>, CH<sub>2</sub>N), 5.15 (d, 1H,  $^2J_{HP} = 11.9$ , C<sub>1</sub>H), 7.31–7.43 (m, 2H, ArH), 7.44–7.63 (m, 2H, ArH), 7.77–7.88 (m, 2H, ArH), 8.02 (d, 1H,  $J_{HH} = 7.5$ , ArH); <sup>13</sup>C NMR (CDCl<sub>3</sub>) δ 13.8 (CH<sub>3</sub>(CH<sub>2</sub>)<sub>3</sub>N), 20.1 (CH<sub>2</sub>(CH<sub>2</sub>)<sub>2</sub>N), 25.9 (C(CH<sub>3</sub>)<sub>3</sub>), 30.0 (CH<sub>2</sub>CH<sub>2</sub>N), 35.9 (d,  $^1J_{P-C} = 60.8$ , C(CH<sub>3</sub>)<sub>3</sub>), 43.2 (CH<sub>2</sub>N), 62.4 (d,  $^1J_{CP} = 62.0$ , C<sub>1</sub>), 123.9 (d,  $J_{CP} = 1.3$ , C<sub>4</sub>), 124.3 (d,  $^3J_{CP} = 2.2$ , C<sub>7</sub>), 128.5 (d,  $^3J_{CP} = 10.5$ , C<sub>3</sub><sup>I</sup>), 128.7 (d,  $J_{CP} = 1.6$ , C<sub>5</sub>), 129.8 (d,  $^1J_{CP} = 45.1$ , C<sub>1</sub><sup>I</sup>), 131.0 (d,  $J_{CP} = 1.9$ , C<sub>6</sub>), 132.3 (d,  $^2J_{CP} = 7.8$ , C<sub>2</sub><sup>I</sup>), 132.40 (d,  $J_{CP} = 1.9$ , C<sub>4</sub><sup>I</sup>), 132.41 (d,  $J_{CP} = 2.9$ , C<sub>3a</sub>), 139.9 (d,  $^2J_{CP} = 1.7$ , C<sub>7a</sub>), 169.3 (d,  $^3J_{CP} = 1.9$ , C<sub>3</sub>); <sup>31</sup>P (CDCl<sub>3</sub>) δ 44.4; [M+H]<sup>+</sup><sub>found</sub> = 370.1946, C<sub>22</sub>H<sub>29</sub>NO<sub>2</sub>P requires 370.1930.

**2-Methylphenyl(phenyl) (2-butyl-3-oxo-2,3-dihydro-2*H*-isoindol-1-yl)phosphine oxide (13)**

Yield: 96% (0.39 g), *dr*: 40:60, light yellow crystals; Mp: 118–120 °C; characterized as a mixture, **Isomer A**: <sup>1</sup>H NMR (CDCl<sub>3</sub>) δ 0.80 (t,  $J_{HH} = 7.3$ , 3H, CH<sub>3</sub>(CH<sub>2</sub>)<sub>3</sub>N), 0.85-0.96 (m,



1H, CH<sub>A</sub>, CH<sub>2</sub>(CH<sub>2</sub>)<sub>2</sub>N), 1.04-1.17 (m, 1H, CH<sub>B</sub>, CH<sub>2</sub>(CH<sub>2</sub>)<sub>2</sub>N), 1.37-1.55 (m, 2H, CH<sub>2</sub>CH<sub>2</sub>N), 2.64-2.77 (m, 1H, CH<sub>A</sub>, CH<sub>2</sub>N), 2.89 (s, 3H, C<sub>2</sub>'CH<sub>3</sub>), 3.86-4.02 (m, 1H, CH<sub>B</sub>, CH<sub>2</sub>N), 5.55 (d, 1H, <sup>2</sup>J<sub>HP</sub> = 10.1, C<sub>1</sub>H), 6.63 (d, 1H, J<sub>HH</sub> = 7.7, ArH), 7.08-7.22 (m, 2H, ArH), 7.23-7.39 (m, 4H, ArH), 7.39-7.60 (m, 5H, ArH), 7.63 (d, 1H, J<sub>HH</sub> = 6.9, ArH); <sup>13</sup>C NMR (CDCl<sub>3</sub>) δ 13.6 (CH<sub>3</sub>(CH<sub>2</sub>)<sub>3</sub>N), 19.9 (CH<sub>2</sub>(CH<sub>2</sub>)<sub>2</sub>N), 21.8 (d, <sup>3</sup>J<sub>CP</sub> = 8.0, C<sub>2</sub>'CH<sub>3</sub>), 30.2 (CH<sub>2</sub>CH<sub>2</sub>N), 41.6 (CH<sub>2</sub>N), 60.5 (d, <sup>1</sup>J<sub>CP</sub> = 71.5, C<sub>1</sub>), 123.4 (d, J<sub>CP</sub> = 1.5, C<sub>4</sub>), 123.6 (d, <sup>3</sup>J<sub>CP</sub> = 2.1, C<sub>7</sub>), 125.1 (d, <sup>1</sup>J<sub>CP</sub> = 94.6, C<sub>1</sub>''), 125.4 (d, <sup>3</sup>J<sub>CP</sub> = 12.5, C<sub>5</sub>'), 128.3 (d, <sup>3</sup>J<sub>CP</sub> = 11.6, C<sub>3</sub>''), 128.5 (d, J<sub>CP</sub> = 1.6, C<sub>5</sub>), 130.9 (d, <sup>1</sup>J<sub>CP</sub> = 95.6, C<sub>1</sub>'), 131.1 (d, J<sub>CP</sub> = 1.7, C<sub>6</sub>), 131.8 (d, <sup>2</sup>J<sub>CP</sub> = 10.0, C<sub>2</sub>''), 132.3 (d, <sup>3</sup>J<sub>CP</sub> = 11.9, C<sub>3</sub>'), 132.4 (d, J<sub>CP</sub> = 3.2, C<sub>4</sub>'), 132.7 (d, <sup>2</sup>J<sub>CP</sub> = 9.5, C<sub>6</sub>'), 132.8 (d, J<sub>CP</sub> = 2.3, C<sub>4</sub>''), 133.3 (d, J<sub>CP</sub> = 1.3, C<sub>3a</sub>), 138.5 (d, <sup>2</sup>J<sub>CP</sub> = 1.7, C<sub>7a</sub>), 142.3 (d, <sup>2</sup>J<sub>CP</sub> = 8.0, C<sub>2</sub>'), 168.3 (d, <sup>3</sup>J<sub>CP</sub> = 1.9, C<sub>3</sub>), \*tentative assignments; <sup>31</sup>P (CDCl<sub>3</sub>) δ 31.1; **Isomer B:** <sup>1</sup>H NMR (CDCl<sub>3</sub>) δ 0.90 (t, J<sub>HH</sub> = 7.2, 3H, CH<sub>3</sub>(CH<sub>2</sub>)<sub>3</sub>N), 1.19-1.37 (m, 2H, CH<sub>2</sub>(CH<sub>2</sub>)<sub>2</sub>N), 1.56-1.78 (m, 2H, CH<sub>2</sub>CH<sub>2</sub>N), 2.91 (s, 3H, C<sub>2</sub>'CH<sub>3</sub>), 3.56-3.68 (m, 1H, CH<sub>A</sub>, CH<sub>2</sub>N), 3.86-4.02 (m, 1H, CH<sub>B</sub>, CH<sub>2</sub>N), 5.64 (d, 1H, J<sub>HP</sub> = 11.6, C<sub>1</sub>H), 7.08-7.22 (m, 3H, ArH), 7.23-7.39 (m, 4H, ArH), 7.39-7.60 (m, 5H, ArH), 7.75 (d, 1H, J<sub>HH</sub> = 7.5, ArH); <sup>13</sup>C NMR (CDCl<sub>3</sub>) δ 13.8 (CH<sub>3</sub>(CH<sub>2</sub>)<sub>3</sub>N), 20.0 (CH<sub>2</sub>(CH<sub>2</sub>)<sub>2</sub>N), 21.8 (d, <sup>3</sup>J<sub>CP</sub> = 8.2, C<sub>2</sub>'CH<sub>3</sub>), 30.0 (CH<sub>2</sub>CH<sub>2</sub>N), 42.0 (CH<sub>2</sub>N), 61.5 (d, <sup>1</sup>J<sub>CP</sub> = 70.8, C<sub>1</sub>), 123.9 (d, J<sub>CP</sub> = 1.0, C<sub>4</sub>), 124.5 (d, <sup>3</sup>J<sub>CP</sub> = 2.3, C<sub>7</sub>), 125.8 (d, <sup>3</sup>J<sub>CP</sub> = 12.5, C<sub>5</sub>'), 126.8 (d, <sup>1</sup>J<sub>CP</sub> = 99.9, C<sub>1</sub>''), 128.3 (d, <sup>3</sup>J<sub>CP</sub> = 11.9, C<sub>3</sub>''), 128.8 (d, J<sub>CP</sub> = 2.2, C<sub>5</sub>), 130.9 (d, <sup>1</sup>J<sub>CP</sub> = 96.3, C<sub>1</sub>'), 131.2 (d, J<sub>CP</sub> = 2.1, C<sub>6</sub>), 131.9 (d, <sup>2</sup>J<sub>CP</sub> = 9.8, C<sub>2</sub>''), 132.58 (d, <sup>3</sup>J<sub>CP</sub> = 11.3, C<sub>3</sub>'), 132.60 (d, J<sub>CP</sub> = 1.8, C<sub>4</sub>'), 132.7 (d, <sup>2</sup>J<sub>CP</sub> = 9.9, C<sub>6</sub>'), 133.3 (d, J<sub>CP</sub> = 3.3, C<sub>4</sub>''), 133.6 (d, J<sub>CP</sub> = 1.6, C<sub>3a</sub>), 139.7 (d, <sup>2</sup>J<sub>CP</sub> = 0.9, C<sub>7a</sub>), 143.7 (d, <sup>2</sup>J<sub>CP</sub> = 7.8, C<sub>2</sub>'), 169.3 (d, <sup>3</sup>J<sub>CP</sub> = 1.3, C<sub>3</sub>), \*tentative assignments; <sup>31</sup>P (CDCl<sub>3</sub>) δ 34.7; [M+H]<sup>+</sup><sub>found</sub> = 404.1790, C<sub>25</sub>H<sub>27</sub>NO<sub>2</sub>P requires 404.1773.

## 2-Methoxyphenyl(phenyl) (2-butyl-3-oxo-2,3-dihydro-2H-isoindol-1-yl)phosphine oxide (14)

Yield: 95% (0.40 g), *dr*: 45:55 white crystals; Mp: 133-135 °C; characterized as a mixture, **Isomer A:** <sup>1</sup>H NMR (CDCl<sub>3</sub>) δ 0.79 (t, J<sub>HH</sub> = 7.2, 3H, CH<sub>3</sub>(CH<sub>2</sub>)<sub>3</sub>N), 0.99-1.15 (m, 2H, CH<sub>2</sub>(CH<sub>2</sub>)<sub>2</sub>N), 1.36-1.44 (m, 1H, CH<sub>A</sub>, CH<sub>2</sub>CH<sub>2</sub>N), 1.46-1.53 (m, 1H, CH<sub>B</sub>, CH<sub>2</sub>CH<sub>2</sub>N), 2.66-2.74 (m, 1H, CH<sub>A</sub>, CH<sub>2</sub>N), 3.86-3.94 (m, 1H, CH<sub>B</sub>, CH<sub>2</sub>N), 3.96 (s, 3H, CH<sub>3</sub>O), 5.86 (d, 1H, <sup>2</sup>J<sub>HP</sub> = 10.4, C<sub>1</sub>H), 6.99 (t, 1H, J<sub>HH</sub> = 6.9, ArH), 7.03-7.12 (m, 1H, ArH), 7.15-7.22 (m, 1H, ArH), 7.22-7.31 (m, 4H, ArH), 7.32-7.42 (m, 2H, ArH), 7.45 (t, 1H, J<sub>HH</sub> = 7.6, ArH), 7.52-7.59 (m, 2H, ArH), 7.68 (d, 1H, J<sub>HH</sub> = 7.6, ArH); <sup>13</sup>C NMR (CDCl<sub>3</sub>) δ 13.7 (CH<sub>3</sub>(CH<sub>2</sub>)<sub>3</sub>N), 20.0 (CH<sub>2</sub>(CH<sub>2</sub>)<sub>2</sub>N), 30.2 (CH<sub>2</sub>CH<sub>2</sub>N), 41.4 (CH<sub>2</sub>N), 55.7 (CH<sub>3</sub>O), 60.1 (d,

$^1J_{CP} = 74.0$ ,  $C_1$ ), 111.2 (d,  $^2J_{CP} = 6.6$ ,  $C_6'$ ), 119.5 (d,  $^1J_{CP} = 94.6$ ,  $C_1''$ )\*, 121.3 (d,  $^3J_{CP} = 11.5$ ,  $C_5'$ ), 123.2 (d,  $J_{CP} = 1.1$ ,  $C_4$ ), 123.4 (d,  $^3J_{CP} = 2.2$ ,  $C_7$ ), 126.6 (d,  $^1J_{CP} = 99.8$ ,  $C_1'$ )\*, 128.0 (d,  $^3J_{CP} = 11.7$ ,  $C_3''$ ), 128.2 (d,  $J_{CP} = 0.8$ ,  $C_5$ ), 131.0 (d,  $J_{CP} = 2.0$ ,  $C_6$ ), 131.7 (d,  $^2J_{CP} = 8.3$ ,  $C_2''$ ), 132.2 (d,  $J_{CP} = 3.0$ ,  $C_4''$ )\*, 133.5 (d,  $J_{CP} = 3.3$ ,  $C_4'$ )\*, 134.3 (d,  $^3J_{CP} = 6.9$ ,  $C_3'$ ), 135.0 (d,  $J_{CP} = 2.2$ ,  $C_{3a}$ ), 139.7 (d,  $^2J_{CP} = 3.3$ ,  $C_{7a}$ ), 161.5 (d,  $^2J_{CP} = 4.1$ ,  $C_2'$ ), 168.2 (d,  $^3J_{CP} = 1.3$ ,  $C_3$ ), \*tentative assignments;  $^{31}P$  ( $CDCl_3$ )  $\delta$  29.3; **Isomer B**:  $^1H$  NMR ( $CDCl_3$ )  $\delta$  0.87 (t,  $J_{HH} = 7.3$ , 3H,  $CH_3(CH_2)_3N$ ), 1.18–1.28 (m, 2H,  $CH_2(CH_2)_2N$ ), 1.54–1.62 (m, 1H,  $CH_A$ ,  $CH_2CH_2N$ ), 1.63–1.72 (m, 1H,  $CH_B$ ,  $CH_2CH_2N$ ), 3.48–3.56 (m, 1H,  $CH_A$ ,  $CH_2N$ ), 3.86–3.94 (m, 1H,  $CH_B$ ,  $CH_2N$ ), 4.05 (s, 3H,  $CH_3O$ ), 5.92 (d, 1H,  $^2J_{HP} = 11.9$ ,  $C_1H$ ), 6.84 (d, 1H,  $J_{HH} = 7.6$ , ArH), 6.92 (t, 1H,  $J_{HH} = 7.2$ , ArH), 7.03–7.12 (m, 1H, ArH), 7.15–7.22 (m, 1H, ArH), 7.22–7.31 (m, 4H, ArH), 7.32–7.42 (m, 2H, ArH), 7.52–7.59 (m, 3H, ArH);  $^{13}C$  NMR ( $CDCl_3$ )  $\delta$  13.8 ( $CH_3(CH_2)_3N$ ), 20.0 ( $CH_2(CH_2)_2N$ ), 30.0 ( $CH_2CH_2N$ ), 41.9 ( $CH_2N$ ), 56.0 ( $CH_3O$ ), 61.5 (d,  $^1J_{CP} = 72.9$ ,  $C_1$ ), 111.3 (d,  $^2J_{CP} = 6.8$ ,  $C_6'$ ), 119.5 (d,  $^1J_{CP} = 94.7$ ,  $C_1''$ )\*, 121.2 (d,  $^3J_{CP} = 11.6$ ,  $C_5'$ ), 123.7 (d,  $J_{CP} = 1.1$ ,  $C_4$ ), 124.4 (d,  $^3J_{CP} = 2.1$ ,  $C_7$ ), 126.7 (d,  $^1J_{CP} = 99.9$ ,  $C_1'$ )\*, 128.0 (d,  $^3J_{CP} = 11.7$ ,  $C_3''$ ), 128.5 (d,  $J_{CP} = 1.2$ ,  $C_5$ ), 130.9 (d,  $J_{CP} = 2.2$ ,  $C_6$ ), 132.0 (d,  $^2J_{CP} = 8.6$ ,  $C_2''$ ), 132.5 (d,  $J_{CP} = 2.9$ ,  $C_4''$ )\*, 133.5 (d,  $J_{CP} = 3.0$ ,  $C_4'$ )\*, 134.3 (d,  $^3J_{CP} = 7.4$ ,  $C_3'$ ), 134.8 (d,  $J_{CP} = 1.9$ ,  $C_{3a}$ ), 138.5 (d,  $^2J_{CP} = 2.4$ ,  $C_{7a}$ ), 161.2 (d,  $^2J_{CP} = 3.5$ ,  $C_2'$ ), 169.3 (d,  $^3J_{CP} = 1.8$ ,  $C_3$ ), \*tentative assignments;  $^{31}P$  ( $CDCl_3$ )  $\delta$  33.7;  $[M+H]^+_{\text{found}} = 420.1739$ ,  $C_{25}H_{27}NO_3P$  requires 420.1723.

## 2-Trifluoromethylphenyl(phenyl) (2-butyl-3-oxo-2,3-dihydro-2H-isoindol-1-yl)phosphine oxide (15)

Yield: 97% (0.44 g), *dr*: 35:65, colourless oil; characterized as a mixture, **Isomer A**:  $^1H$  NMR ( $CDCl_3$ )  $\delta$  0.77 (t,  $J_{HH} = 7.4$ , 3H,  $CH_3(CH_2)_3N$ ), 0.97–1.17 (m, 2H,  $CH_2(CH_2)_2N$ ), 1.19–1.39 (m, 1H,  $CH_A$ ,  $CH_2CH_2N$ ), 1.38–1.52 (m, 1H,  $CH_B$ ,  $CH_2CH_2N$ ), 2.54–2.64 (m, 1H,  $CH_A$ ,  $CH_2N$ ), 3.84–3.95 (m, 1H,  $CH_B$ ,  $CH_2N$ ), 5.63 (d, 1H,  $^2J_{HP} = 10.7$ ,  $C_1H$ ), 6.57 (d, 1H,  $J_{HH} = 7.6$ , ArH), 7.13 (d, 1H,  $J_{HH} = 6.6$ , ArH), 7.29–7.41 (m, 3H, ArH), 7.42–7.60 (m, 4H, ArH), 7.67 (d, 1H,  $J_{HH} = 7.2$ , ArH), 7.74 (d, 1H,  $J_{HH} = 6.9$ , ArH), 7.98–8.02 (m, 4H, ArH);  $^{13}C$  NMR ( $CDCl_3$ )  $\delta$  13.5 ( $CH_3(CH_2)_3N$ ), 19.9 ( $CH_2(CH_2)_2N$ ), 29.7 ( $CH_2CH_2N$ ), 41.9 ( $CH_2N$ ), 61.7 (dd,  $^1J_{CP} = 74.9$ ,  $J_{CF} = 2.5$ ,  $C_1$ ), 123.6 (d,  $^3J_{CP} = 0.9$ ,  $C_7$ ), 124.5 (d,  $J_{CP} = 2.3$ ,  $C_4$ ), 126.6 (d,  $^1J_{CP} = 103.6$ ,  $C_1''$ ), 127.2 ( $^1J_{CP} = 100.7$ ,  $C_1'$ ), 128.5 (d,  $^3J_{CP} = 11.6$ ,  $C_3''$ ), 128.7 (m,  $C_3'$ ), 129.1 (d,  $J_{CP} = 1.8$ ,  $C_5$ ), 130.3 (dd,  $^3J_{CP} = 2.1$ ,  $^1J_{CF} = 235.0$ ,  $CF_3$ ), 131.6 (dd,  $^2J_{CP} = 11.3$ ,  $^2J_{CF} = 36.4$ ,  $C_2'$ ), 131.5 (d,  $J_{CP} = 2.1$ ,  $C_6$ ), 131.9 (d,  $^2J_{CP} = 8.2$ ,  $C_2''$ ), 132.7 (d,  $J_{CP} = 4.0$ ,  $C_4''$ ),

132.9 (d,  $J_{CP} = 3.1$ , C<sub>4</sub>'), 133.0 (d,  $^2J_{CP} = 6.6$ , C<sub>6</sub>'), 133.6 (d,  $J_{CP} = 3.2$ , C<sub>3a</sub>), 134.2 (d,  $^3J_{CP} = 10.5$ , C<sub>5</sub>'), 139.7 (d,  $^2J_{CP} = 2.4$ , C<sub>7a</sub>), 169.6 (d,  $^3J_{CP} = 2.1$ , C<sub>3</sub>);  $^{31}\text{P}$  (CDCl<sub>3</sub>)  $\delta$  28.4; **Isomer B**:  $^1\text{H}$  NMR (CDCl<sub>3</sub>)  $\delta$  0.89 (t,  $J_{\text{HH}} = 7.2$ , 3H, CH<sub>3</sub>(CH<sub>2</sub>)<sub>3</sub>N), 1.19-1.31 (m, 2H, CH<sub>2</sub>(CH<sub>2</sub>)<sub>2</sub>N), 1.54-1.66 (m, 1H, CH<sub>A</sub>, CH<sub>2</sub>CH<sub>2</sub>N), 1.66-1.76 (m, 1H, CH<sub>B</sub>, CH<sub>2</sub>CH<sub>2</sub>N), 3.47-3.56 (m, 1H, CH<sub>A</sub>, CH<sub>2</sub>N), 3.84-3.95 (m, 1H, CH<sub>B</sub>, CH<sub>2</sub>N), 5.72 (d, 1H,  $^2J_{\text{HP}} = 12.6$ , C<sub>1</sub>H), 7.11 (d, 1H,  $J_{\text{HH}} = 7.6$ , ArH), 7.28 (d, 1H,  $J_{\text{HH}} = 5.1$ , ArH), 7.29-7.41 (m, 3H, ArH), 7.42-7.60 (m, 4H, ArH), 7.80 (d, 1H,  $J_{\text{HH}} = 7.3$ , ArH), 7.74 (d, 1H,  $J_{\text{HH}} = 6.9$ , ArH), 8.02-8.07 (m, 4H, ArH);  $^{13}\text{C}$  NMR (CDCl<sub>3</sub>)  $\delta$  13.7 (CH<sub>3</sub>(CH<sub>2</sub>)<sub>3</sub>N), 19.9 (CH<sub>2</sub>(CH<sub>2</sub>)<sub>2</sub>N), 29.9 (CH<sub>2</sub>CH<sub>2</sub>N), 42.1 (CH<sub>2</sub>N), 61.9 (dd,  $^1J_{CP} = 72.6$ ,  $J_{CF} = 3.0$ , C<sub>1</sub>), 123.5 (d,  $J_{CP} = 2.1$ , C<sub>4</sub>), 124.2 (d,  $^3J_{CP} = 0.9$ , C<sub>7</sub>), 126.6 (d,  $^1J_{CP} = 103.8$ , C<sub>1</sub>''), 127.2 ( $^1J_{CP} = 100.9$ , C<sub>1</sub>), 128.5 (d,  $^3J_{CP} = 11.6$ , C<sub>3</sub>''), 128.7 (m, C<sub>3</sub>'), 129.1 (d,  $J_{CP} = 1.4$ , C<sub>5</sub>), 130.3 (dd,  $^3J_{CP} = 2.1$ ,  $^1J_{CF} = 239.8$ , CF<sub>3</sub>), 131.2 (d,  $J_{CP} = 1.8$ , C<sub>6</sub>), 131.6 (dd,  $^2J_{CP} = 11.3$ ,  $^2J_{CF} = 37.2$ , C<sub>2</sub>'), 132.2 (d,  $^2J_{CP} = 7.8$ , C<sub>2</sub>''), 132.7 (d,  $J_{CP} = 3.3$ , C<sub>4</sub>''), 133.00 (d,  $^2J_{CP} = 6.6$ , C<sub>6</sub>'), 133.03 (d,  $J_{CP} = 3.1$ , C<sub>4</sub>'), 133.6 (d,  $J_{CP} = 1.8$ , C<sub>3a</sub>), 134.5 (d,  $^3J_{CP} = 10.5$ , C<sub>5</sub>'), 138.2 (d,  $^2J_{CP} = 1.8$ , C<sub>7a</sub>), 168.3 (d,  $^3J_{CP} = 2.1$ , C<sub>3</sub>);  $^{31}\text{P}$  (CDCl<sub>3</sub>)  $\delta$  32.7;  $[\text{M}+\text{H}]^+$ <sub>found</sub> = 458.1504, C<sub>25</sub>H<sub>24</sub>NO<sub>2</sub>F<sub>3</sub>P requires 458.1491.

### 3-Trifluoromethylphenyl(phenyl) (2-butyl-3-oxo-2,3-dihydro-2H-isoindol-1-yl)phosphine oxide (16)

Yield: 96% (0.44 g), *dr*: 50:55, colourless oil; characterized as a mixture, **Isomer A**:  $^1\text{H}$  NMR (CDCl<sub>3</sub>)  $\delta$  0.77 (t,  $J_{\text{HH}} = 7.5$ , 3H, CH<sub>3</sub>(CH<sub>2</sub>)<sub>3</sub>N), 1.01-1.23 (m, 2H, CH<sub>2</sub>(CH<sub>2</sub>)<sub>2</sub>N), 1.37-1.64 (m, 2H, CH<sub>2</sub>CH<sub>2</sub>N), 2.94-3.02 (m, 1H, CH<sub>A</sub>, CH<sub>2</sub>N), 3.83-3.97 (m, 1H, CH<sub>B</sub>, CH<sub>2</sub>N), 5.43 (d, 1H,  $^2J_{\text{HP}} = 10.5$ , C<sub>1</sub>H), 6.70 (d, 1H,  $J_{\text{HH}} = 7.6$ , ArH), 7.24-7.65 (m, 10H, ArH), 7.67-7.78 (m, 2H, ArH);  $^{13}\text{C}$  NMR (CDCl<sub>3</sub>)  $\delta$  13.6 (CH<sub>3</sub>(CH<sub>2</sub>)<sub>3</sub>N), 19.8 (CH<sub>2</sub>(CH<sub>2</sub>)<sub>2</sub>N), 29.9 (CH<sub>2</sub>CH<sub>2</sub>N), 41.7 (CH<sub>2</sub>N), 60.7 (d,  $^1J_{CP} = 73.8$ , C<sub>1</sub>), 123.2 (dd,  $J_{CP} = 1.6$ ,  $^1J_{CF} = 274.3$ , CF<sub>3</sub>), 123.76 (d,  $^3J_{CP} = 2.5$ , C<sub>7</sub>), 123.83 (d,  $J_{CP} = 0.9$ , C<sub>4</sub>), 127.7 (d,  $^1J_{CP} = 98.6$ , C<sub>1</sub>'\*)\*, 128.4 (d,  $^1J_{CP} = 97.3$ , C<sub>1</sub>'')\*, 128.6 (m, C<sub>2</sub>'), 128.7 (dd,  $^3J_{CP} = 9.4$ ,  $^2J_{CF} = 30.6$ , C<sub>3</sub>'), 129.00 (d,  $^3J_{CP} = 11.8$ , C<sub>3</sub>''), 129.04 (d,  $^3J_{CP} = 13.3$ , C<sub>5</sub>'), 129.3 (d,  $J_{CP} = 2.8$ , C<sub>5</sub>), 129.4 (d,  $J_{CP} = 4.0$ , C<sub>4</sub>''), 131.3 (d,  $J_{CP} = 1.9$ , C<sub>6</sub>), 131.4 (d,  $^2J_{CP} = 9.1$ , C<sub>2</sub>''), 132.6 (d,  $J_{CP} = 3.1$ , C<sub>4</sub>'), 133.3 (d,  $J_{CP} = 2.8$ , C<sub>3a</sub>), 134.5 (d,  $^2J_{CP} = 8.6$ , C<sub>6</sub>'), 137.9 (d,  $^2J_{CP} = 2.0$ , C<sub>7a</sub>), 168.3 (d,  $^3J_{CP} = 1.6$ , C<sub>3</sub>), \*tentative assignments;  $^{31}\text{P}$  (CDCl<sub>3</sub>)  $\delta$  29.2; **Isomer B**:  $^1\text{H}$  NMR (CDCl<sub>3</sub>)  $\delta$  0.81 (t,  $J_{\text{HH}} = 7.3$ , 3H, CH<sub>3</sub>(CH<sub>2</sub>)<sub>3</sub>N), 1.01-1.23 (m, 2H, CH<sub>2</sub>(CH<sub>2</sub>)<sub>2</sub>N), 1.37-1.64 (m, 2H, CH<sub>2</sub>CH<sub>2</sub>N), 3.29-3.97 (m, 1H, CH<sub>A</sub>, CH<sub>2</sub>N), 3.83-3.97 (m, 1H, CH<sub>B</sub>, CH<sub>2</sub>N), 5.47 (d, 1H,  $^2J_{\text{HP}} = 10.9$ , C<sub>1</sub>H), 6.98 (d, 1H,  $J_{\text{HH}} = 7.2$ , ArH), 7.24-7.65 (m, 10H, ArH), 7.67-7.78 (m, 1H, ArH), 7.88 (d, 1H,

$J_{\text{HH}} = 11.3$ , ArH);  $^{13}\text{C}$  NMR ( $\text{CDCl}_3$ )  $\delta$  13.6 ( $\text{CH}_3(\text{CH}_2)_3\text{N}$ ), 19.9 ( $\text{CH}_2(\text{CH}_2)_2\text{N}$ ), 30.0 ( $\text{CH}_2\text{CH}_2\text{N}$ ), 42.0 ( $\text{CH}_2\text{N}$ ), 61.0 (d,  $^1J_{\text{CP}} = 73.8$ ,  $\text{C}_1$ ), 123.3 (dd,  $J_{\text{CP}} = 1.4$ ,  $^1J_{\text{CF}} = 273.1$ ,  $\text{CF}_3$ ), 123.99 (d,  $^3J_{\text{CP}} = 2.5$ ,  $\text{C}_7$ ), 124.00 (d,  $J_{\text{CP}} = 1.4$ ,  $\text{C}_4$ ), 128.5 (d,  $^1J_{\text{CP}} = 98.4$ ,  $\text{C}_1$ )<sup>\*</sup>, 128.77 (dd,  $^3J_{\text{CP}} = 9.4$ ,  $^2J_{\text{CF}} = 31.3$ ,  $\text{C}_3$ '), 128.80 (m,  $\text{C}_2$ '), 129.00 (d,  $^3J_{\text{CP}} = 11.8$ ,  $\text{C}_3$ ''), 129.2 (d,  $^3J_{\text{CP}} = 11.6$ ,  $\text{C}_5$ '), 129.51 (d,  $J_{\text{CP}} = 3.2$ ,  $\text{C}_4$ ''), 129.53 (d,  $J_{\text{CP}} = 2.9$ ,  $\text{C}_5$ ), 129.6 (d,  $^1J_{\text{CP}} = 96.3$ ,  $\text{C}_1$ '')<sup>\*</sup>, 131.3 (d,  $J_{\text{CP}} = 2.2$ ,  $\text{C}_6$ ), 131.5 (d,  $^2J_{\text{CP}} = 9.4$ ,  $\text{C}_2$ ''), 132.9 (d,  $J_{\text{CP}} = 3.2$ ,  $\text{C}_4$ '), 133.3 (d,  $J_{\text{CP}} = 2.8$ ,  $\text{C}_{3a}$ ), 135.3 (d,  $^2J_{\text{CP}} = 8.4$ ,  $\text{C}_6$ '), 138.3 (d,  $^2J_{\text{CP}} = 3.2$ ,  $\text{C}_{7a}$ ), 168.6 (d,  $^3J_{\text{CP}} = 1.6$ ,  $\text{C}_3$ ), <sup>\*</sup>tentative assignments;  $^{31}\text{P}$  ( $\text{CDCl}_3$ )  $\delta$  30.5;  $[\text{M}+\text{H}]^+_{\text{found}} = 458.1505$ ,  $\text{C}_{25}\text{H}_{24}\text{NO}_2\text{F}_3\text{P}$  requires 458.1491.

#### 4-Trifluoromethylphenyl(phenyl) (2-butyl-3-oxo-2,3-dihydro-2*H*-isoindol-1-yl)phosphine oxide (17)

Yield: 98% (0.45 g), *dr*: 50:50, colourless oil; characterized as a mixture, **Isomer A**:  $^1\text{H}$  NMR ( $\text{CDCl}_3$ )  $\delta$  0.82 (t,  $J_{\text{HH}} = 7.2$ , 3H,  $\text{CH}_3(\text{CH}_2)_3\text{N}$ ), 1.06-1.33 (m, 2H,  $\text{CH}_2(\text{CH}_2)_2\text{N}$ ), 1.41-1.69 (m, 2H,  $\text{CH}_2\text{CH}_2\text{N}$ ), 2.95-3.04 (m, 1H,  $\text{CH}_A$ ,  $\text{CH}_2\text{N}$ ), 3.89-4.02 (m, 1H,  $\text{CH}_B$ ,  $\text{CH}_2\text{N}$ ), 5.48 (d, 1H,  $^2J_{\text{HP}} = 11.1$ ,  $\text{C}_1\text{H}$ ), 6.75 (d, 1H,  $J_{\text{HH}} = 7.1$ , ArH), 7.29-7.35 (m, 1H, ArH), 7.40-7.56 (m, 5H, ArH), 7.57-7.73 (m, 5H, ArH) 7.73-7.80 (m, 1H, ArH);  $^{13}\text{C}$  NMR ( $\text{CDCl}_3$ )  $\delta$  13.6 ( $\text{CH}_3(\text{CH}_2)_3\text{N}$ ), 19.8 ( $\text{CH}_2(\text{CH}_2)_2\text{N}$ ), 29.9 ( $\text{CH}_2\text{CH}_2\text{N}$ ), 41.7 ( $\text{CH}_2\text{N}$ ), 60.7 (d,  $^1J_{\text{CP}} = 74.2$ ,  $\text{C}_1$ ), 123.87 (d,  $J_{\text{CP}} = 1.2$ ,  $\text{C}_4$ ), 123.90 (d,  $^3J_{\text{CP}} = 2.4$ ,  $\text{C}_7$ ), 125.4 (d,  $^1J_{\text{CF}} = 261.1$ ,  $\text{CF}_3$ ), 125.4 (m,  $\text{C}_3$ '), 129.02 (d,  $^3J_{\text{CP}} = 11.5$ ,  $\text{C}_3$ ''), 129.03 (d,  $J_{\text{CP}} = 1.4$ ,  $\text{C}_5$ ), 131.3 (dd,  $J_{\text{CP}} = 1.8$ ,  $^2J_{\text{CF}} = 16.0$ ,  $\text{C}_4$ '), 131.47 (d,  $J_{\text{CP}} = 2.2$ ,  $\text{C}_6$ ), 131.49 (d,  $^2J_{\text{CP}} = 9.3$ ,  $\text{C}_2$ '\*)<sup>\*</sup>, 132.22 (d,  $^2J_{\text{CP}} = 9.0$ ,  $\text{C}_2$ '')<sup>\*</sup>, 132.26 (d,  $J_{\text{CP}} = 1.8$ ,  $\text{C}_{3a}$ ), 132.27 (d,  $^1J_{\text{CP}} = 92.8$ ,  $\text{C}_1$ '\*)<sup>\*</sup>, 132.5 (d,  $^1J_{\text{CP}} = 104.3$ ,  $\text{C}_1$ '')<sup>\*</sup>, 133.4 (d,  $J_{\text{CP}} = 1.4$ ,  $\text{C}_4$ ''), 138.0 (d,  $^2J_{\text{CP}} = 2.4$ ,  $\text{C}_{7a}$ ), 168.4 (d,  $^3J_{\text{CP}} = 0.9$ ,  $\text{C}_3$ ), <sup>\*</sup>tentative assignments;  $^{31}\text{P}$  ( $\text{CDCl}_3$ )  $\delta$  29.1; **Isomer B**:  $^1\text{H}$  NMR ( $\text{CDCl}_3$ )  $\delta$  0.86 (t,  $J_{\text{HH}} = 7.1$ , 3H,  $\text{CH}_3(\text{CH}_2)_3\text{N}$ ), 1.06-1.33 (m, 2H,  $\text{CH}_2(\text{CH}_2)_2\text{N}$ ), 1.41-1.69 (m, 2H,  $\text{CH}_2\text{CH}_2\text{N}$ ), 3.31-3.40 (m, 1H,  $\text{CH}_A$ ,  $\text{CH}_2\text{N}$ ), 3.89-4.02 (m, 1H,  $\text{CH}_B$ ,  $\text{CH}_2\text{N}$ ), 5.51 (d, 1H,  $^2J_{\text{HP}} = 11.2$ ,  $\text{C}_1\text{H}$ ), 7.14 (d, 1H,  $J_{\text{HH}} = 6.4$ , ArH), 7.35-7.40 (m, 1H, ArH), 7.40-7.56 (m, 5H, ArH), 7.57-7.73 (m, 5H, ArH) 7.73-7.80 (m, 1H, ArH);  $^{13}\text{C}$  NMR ( $\text{CDCl}_3$ )  $\delta$  13.7 ( $\text{CH}_3(\text{CH}_2)_3\text{N}$ ), 19.9 ( $\text{CH}_2(\text{CH}_2)_2\text{N}$ ), 30.0 ( $\text{CH}_2\text{CH}_2\text{N}$ ), 42.0 ( $\text{CH}_2\text{N}$ ), 61.1 (d,  $^1J_{\text{CP}} = 73.7$ ,  $\text{C}_1$ ), 124.04 (d,  $J_{\text{CP}} = 1.4$ ,  $\text{C}_4$ ), 124.06 (d,  $^3J_{\text{CP}} = 1.7$ ,  $\text{C}_7$ ), 125.4 (d,  $^1J_{\text{CF}} = 261.1$ ,  $\text{CF}_3$ ), 125.4 (m,  $\text{C}_3$ '), 129.0 (d,  $^3J_{\text{CP}} = 11.0$ ,  $\text{C}_3$ ''), 129.1 (d,  $J_{\text{CP}} = 1.4$ ,  $\text{C}_5$ ), 131.4 (dd,  $J_{\text{CP}} = 1.6$ ,  $^2J_{\text{CF}} = 15.4$ ,  $\text{C}_4$ '), 131.5 (d,  $^2J_{\text{CP}} = 9.3$ ,  $\text{C}_2$ '\*)<sup>\*</sup>, 131.6 (d,  $J_{\text{CP}} = 1.6$ ,  $\text{C}_6$ ), 132.3 (d,  $^1J_{\text{CP}} = 94.0$ ,  $\text{C}_1$ '\*)<sup>\*</sup>, 132.41 (d,  $^2J_{\text{CP}} = 9.0$ ,  $\text{C}_2$ '')<sup>\*</sup>, 132.44 (d,  $J_{\text{CP}} = 2.3$ ,  $\text{C}_{3a}$ ), 134.5 (d,  $^1J_{\text{CP}} = 103.9$ ,  $\text{C}_1$ '')<sup>\*</sup>, 133.4 (d,  $J_{\text{CP}} = 1.4$ ,  $\text{C}_4$ ''), 138.4 (d,  $^2J_{\text{CP}} = 2.7$ ,  $\text{C}_{7a}$ ), 168.8 (d,  $^3J_{\text{CP}} = 0.9$ ,

C<sub>3</sub>), \*tentative assignments; <sup>31</sup>P (CDCl<sub>3</sub>) δ 30.1; [M+H]<sup>+</sup><sub>found</sub> = 458.1506, C<sub>25</sub>H<sub>24</sub>NO<sub>2</sub>F<sub>3</sub>P requires 458.1491.

**2-Phenyl-phenyl(phenyl) (2-butyl-3-oxo-2,3-dihydro-2H-isoindol-1-yl)phosphine oxide (18)**

Yield: 96% (0.45 g), *dr*: 40:60, yellow oil; characterized as a mixture, **Isomer A**: <sup>1</sup>H NMR (CDCl<sub>3</sub>) δ 0.83 (t, *J*<sub>HH</sub> = 7.5, 3H, CH<sub>3</sub>(CH<sub>2</sub>)<sub>3</sub>N), 0.98-1.09 (m, 2H, CH<sub>2</sub>(CH<sub>2</sub>)<sub>2</sub>N), 1.19-1.36 (m, 2H, CH<sub>2</sub>CH<sub>2</sub>N), 2.47-2.55 (m, 1H, CH<sub>A</sub>, CH<sub>2</sub>N), 3.65-3.76 (m, 1H, CH<sub>B</sub>, CH<sub>2</sub>N), 4.47 (d, 1H, <sup>2</sup>*J*<sub>HP</sub> = 12.3, C<sub>1</sub>H), 6.56 (d, 1H, *J*<sub>HH</sub> = 7.7, ArH), 7.07-7.19 (m, 2H, ArH), 7.21-7.28 (m, 2H, ArH), 7.28-7.43 (m, 5H, ArH), 7.43-7.49 (m, 2H, ArH), 7.50-7.55 (m, 1H, ArH), 7.55-7.61 (m, 1H, ArH), 7.61-7.66 (m, 1H, ArH), 7.66-7.74 (m, 1H, ArH), 7.78 (d, 1H, *J*<sub>HH</sub> = 7.8, ArH), 7.86-8.02 (m, 1H, ArH); <sup>13</sup>C NMR (CDCl<sub>3</sub>) δ 13.9 (CH<sub>3</sub>(CH<sub>2</sub>)<sub>3</sub>N), 20.0 (CH<sub>2</sub>(CH<sub>2</sub>)<sub>2</sub>N), 29.6 (CH<sub>2</sub>CH<sub>2</sub>N), 41.9 (CH<sub>2</sub>N), 58.6 (d, <sup>1</sup>*J*<sub>CP</sub> = 70.0, C<sub>1</sub>), 123.0 (d, *J*<sub>CP</sub> = 1.3, C<sub>4</sub>), 123.1 (d, <sup>3</sup>*J*<sub>CP</sub> = 2.4, C<sub>7</sub>), 125.3 (d, *J*<sub>CP</sub> = 1.8, ArC), 127.3 (d, *J*<sub>CP</sub> = 12.1, ArC), 127.7 (d, *J*<sub>CP</sub> = 11.6, ArC), 128.0 (d, *J*<sub>CP</sub> = 100.2, ArC), 128.35 (d, *J*<sub>CP</sub> = 2.0, C<sub>5</sub>), 128.38 (ArC), 128.8 (ArC), 129.7 (d, *J*<sub>CP</sub> = 1.8, C<sub>6</sub>), 129.8 (ArC), 131.0 (d, *J*<sub>CP</sub> = 10.1, ArC), 131.7 (d, *J*<sub>CP</sub> = 102.7, ArC), 132.2 (d, *J*<sub>CP</sub> = 2.6, C<sub>3a</sub>), 132.6 (d, *J*<sub>CP</sub> = 8.7, ArC), 132.7 (d, *J*<sub>CP</sub> = 4.7, ArC), 132.9 (d, *J*<sub>CP</sub> = 5.0, ArC), 133.5 (d, *J*<sub>CP</sub> = 11.9, ArC), 138.4 (d, <sup>2</sup>*J*<sub>CP</sub> = 1.7, C<sub>7a</sub>), 140.2 (d, *J*<sub>CP</sub> = 3.1, ArC), 147.4 (d, *J*<sub>CP</sub> = 8.8, ArC), 167.9 (d, <sup>3</sup>*J*<sub>CP</sub> = 1.8, C<sub>3</sub>); <sup>31</sup>P (CDCl<sub>3</sub>) δ 33.4; **Isomer B**: <sup>1</sup>H NMR (CDCl<sub>3</sub>) δ 0.86 (t, *J*<sub>HH</sub> = 7.5, 3H, CH<sub>3</sub>(CH<sub>2</sub>)<sub>3</sub>N), 1.09-1.18 (m, 2H, CH<sub>2</sub>(CH<sub>2</sub>)<sub>2</sub>N), 1.19-1.36 (m, 2H, CH<sub>2</sub>CH<sub>2</sub>N), 3.65-3.76 (m, 1H, CH<sub>A</sub>, CH<sub>2</sub>N), 3.82-3.91 (m, 1H, CH<sub>B</sub>, CH<sub>2</sub>N), 4.61 (d, 1H, <sup>2</sup>*J*<sub>HP</sub> = 8.7, C<sub>1</sub>H), 6.85 (d, 1H, *J*<sub>HH</sub> = 11.4, ArH), 7.07-7.19 (m, 3H, ArH), 7.21-7.28 (m, 2H, ArH), 7.28-7.43 (m, 5H, ArH), 7.43-7.49 (m, 2H, ArH), 7.50-7.55 (m, 1H, ArH), 7.55-7.61 (m, 1H, ArH), 7.61-7.66 (m, 1H, ArH), 7.66-7.74 (m, 1H, ArH), 7.86-8.02 (m, 1H, ArH); <sup>13</sup>C NMR (CDCl<sub>3</sub>) δ 14.0 (CH<sub>3</sub>(CH<sub>2</sub>)<sub>3</sub>N), 20.3 (CH<sub>2</sub>(CH<sub>2</sub>)<sub>2</sub>N), 30.5 (CH<sub>2</sub>CH<sub>2</sub>N), 42.1 (CH<sub>2</sub>N), 59.2 (d, <sup>1</sup>*J*<sub>CP</sub> = 71.0, C<sub>1</sub>), 124.2 (d, *J*<sub>CP</sub> = 0.9, C<sub>4</sub>), 124.5 (d, <sup>3</sup>*J*<sub>CP</sub> = 1.0, C<sub>7</sub>), 125.6 (d, *J*<sub>CP</sub> = 2.3, ArC), 127.4 (d, *J*<sub>CP</sub> = 11.9, ArC), 127.9 (d, *J*<sub>CP</sub> = 11.4, ArC), 128.1 (d, *J*<sub>CP</sub> = 95.5, ArC), 128.6 (ArC), 128.7 (d, *J*<sub>CP</sub> = 2.3, C<sub>5</sub>), 128.9 (ArC), 129.8 (ArC), 130.6 (d, *J*<sub>CP</sub> = 1.4, C<sub>6</sub>), 131.0 (d, *J*<sub>CP</sub> = 10.0, ArC), 131.7 (d, *J*<sub>CP</sub> = 95.0, ArC), 132.86 (d, *J*<sub>CP</sub> = 9.0, ArC), 132.87 (d, *J*<sub>CP</sub> = 5.0, ArC), 133.0 (d, *J*<sub>CP</sub> = 3.8, ArC), 133.5 (d, *J*<sub>CP</sub> = 11.6, ArC), 133.9 (d, *J*<sub>CP</sub> = 3.2, C<sub>3a</sub>), 139.5 (d, <sup>2</sup>*J*<sub>CP</sub> = 4.1, C<sub>7a</sub>), 140.7 (d, *J*<sub>CP</sub> = 3.4, ArC), 147.5 (d, *J*<sub>CP</sub> = 9.0, ArC), 169.3 (d, <sup>3</sup>*J*<sub>CP</sub> = 1.3, C<sub>3</sub>); <sup>31</sup>P (CDCl<sub>3</sub>) δ 36.2; [M+H]<sup>+</sup><sub>found</sub> = 466.1942, C<sub>30</sub>H<sub>29</sub>NO<sub>2</sub>P requires 466.1930.

### 1-Naphthyl(phenyl) (2-butyl-3-oxo-2,3-dihydro-2*H*-isoindol-1-yl)phosphine oxide (19)

Yield: 97% (0.43 g), *dr*: 45:55; characterized after separation by column chromatography:

**Isomer A:** white crystals; Mp: 178–180 °C; <sup>1</sup>H NMR (CDCl<sub>3</sub>) δ 0.43 (t, *J*<sub>HH</sub> = 6.5, 3H, CH<sub>3</sub>(CH<sub>2</sub>)<sub>3</sub>N), 0.40–0.51 (m, 1H, CH<sub>A</sub>, CH<sub>2</sub>(CH<sub>2</sub>)<sub>2</sub>N), 0.64–0.76 (m, 1H, CH<sub>B</sub>, CH<sub>2</sub>(CH<sub>2</sub>)<sub>2</sub>N), 0.78–0.90 (m, 1H, CH<sub>A</sub>, CH<sub>2</sub>CH<sub>2</sub>N), 0.90–1.00 (m, 1H, CH<sub>B</sub>, CH<sub>2</sub>CH<sub>2</sub>N), 1.90–1.98 (m, 1H, CH<sub>A</sub>, CH<sub>2</sub>N), 3.67–3.76 (m, 1H, CH<sub>B</sub>, CH<sub>2</sub>N), 5.81 (d, 1H, <sup>2</sup>*J*<sub>HP</sub> = 10.5, C<sub>1</sub>H), 7.28–7.37 (m, 3H, ArH), 7.38–7.52 (m, 4H, ArH), 7.57–7.70 (m, 4H, ArH), 7.76 (d, 1H, *J*<sub>HH</sub> = 7.8, ArH), 7.92 (d, 1H, *J*<sub>HH</sub> = 7.8, ArH), 8.00 (d, 1H, *J*<sub>HH</sub> = 8.3, ArH), 8.10 (d, 1H, *J*<sub>HH</sub> = 8.2, ArH), 9.26 (d, 1H, *J*<sub>HH</sub> = 8.7, ArH); <sup>13</sup>C NMR (CDCl<sub>3</sub>) δ 13.2 (CH<sub>3</sub>(CH<sub>2</sub>)<sub>3</sub>N), 19.5 (CH<sub>2</sub>(CH<sub>2</sub>)<sub>2</sub>N), 29.8 (CH<sub>2</sub>CH<sub>2</sub>N), 41.1 (CH<sub>2</sub>N), 60.3 (d, <sup>1</sup>*J*<sub>CP</sub> = 72.1, C<sub>1</sub>), 123.4 (d, *J*<sub>CP</sub> = 1.7, C<sub>4</sub>), 124.59 (d, <sup>3</sup>*J*<sub>CP</sub> = 14.4, C<sub>3</sub>'), 123.64 (d, <sup>3</sup>*J*<sub>CP</sub> = 2.1, C<sub>7</sub>), 125.7 (d, <sup>1</sup>*J*<sub>CP</sub> = 100.1, C<sub>1</sub>'), 126.4 (d, <sup>2</sup>*J*<sub>CP</sub> = 4.4, C<sub>2</sub>'), 127.1 (C<sub>6</sub>'), 127.2 (d, <sup>1</sup>*J*<sub>CP</sub> = 93.7, C<sub>1</sub>''), 128.1 (C<sub>5</sub>'), 128.3 (d, <sup>3</sup>*J*<sub>CP</sub> = 11.4, C<sub>3</sub>''), 128.5 (d, *J*<sub>CP</sub> = 1.7, C<sub>5</sub>), 129.5 (d, <sup>4</sup>*J*<sub>CP</sub> = 1.7, C<sub>4</sub>'), 131.4 (d, *J*<sub>CP</sub> = 1.7, C<sub>6</sub>), 131.9 (d, *J*<sub>CP</sub> = 3.1, C<sub>4</sub>''), 131.0 (d, <sup>2</sup>*J*<sub>CP</sub> = 7.8, C<sub>2</sub>''), 132.5 (d, *J*<sub>CP</sub> = 2.5, C<sub>3a</sub>), 132.5 (d, <sup>3</sup>*J*<sub>CP</sub> = 11.5, C<sub>8</sub>'), 134.0 (d, <sup>2</sup>*J*<sub>CP</sub> = 5.2, C<sub>9</sub>'), 134.1 (d, <sup>3</sup>*J*<sub>CP</sub> = 5.3, C<sub>10</sub>'), 134.1 (d, *J*<sub>CP</sub> = 2.9, C<sub>7</sub>'), 140.0 (d, <sup>2</sup>*J*<sub>CP</sub> = 3.6, C<sub>7a</sub>), 169.4 (d, <sup>3</sup>*J*<sub>CP</sub> = 2.3, C<sub>3</sub>); <sup>31</sup>P (CDCl<sub>3</sub>) δ 30.4; [M+H]<sup>+</sup><sub>found</sub> = 440.1794, C<sub>28</sub>H<sub>27</sub>NO<sub>2</sub>P requires 440.1773.

**Isomer B:** colourless oil; <sup>1</sup>H NMR (CDCl<sub>3</sub>) δ 0.95 (t, *J*<sub>HH</sub> = 7.3, 3H, CH<sub>3</sub>(CH<sub>2</sub>)<sub>3</sub>N), 1.27–1.37 (m, 2H, CH<sub>2</sub>(CH<sub>2</sub>)<sub>2</sub>N), 1.64–1.87 (m, 2H, CH<sub>2</sub>CH<sub>2</sub>N), 3.72–3.80 (m, 1H, CH<sub>A</sub>, CH<sub>2</sub>N), 3.94–4.04 (m, 1H, CH<sub>B</sub>, CH<sub>2</sub>N), 5.83 (d, 1H, <sup>2</sup>*J*<sub>HP</sub> = 11.8, C<sub>1</sub>H), 5.94 (d, 1H, *J*<sub>HH</sub> = 7.7, ArH), 7.09–7.21 (m, 3H, ArH), 7.29–7.42 (m, 5H, ArH), 7.52 (t, 1H, *J*<sub>HH</sub> = 7.4, ArH), 7.67 (t, 1H, *J*<sub>HH</sub> = 7.5, ArH), 7.71–7.80 (m, 2H, ArH), 8.02 (d, 1H, *J*<sub>HH</sub> = 8.2, ArH), 8.12 (d, 1H, *J*<sub>HH</sub> = 6.4, ArH), 9.22 (d, 1H, *J*<sub>HH</sub> = 8.5, ArH); <sup>13</sup>C NMR (CDCl<sub>3</sub>) δ 13.9 (CH<sub>3</sub>(CH<sub>2</sub>)<sub>3</sub>N), 20.1 (CH<sub>2</sub>(CH<sub>2</sub>)<sub>2</sub>N), 30.2 (CH<sub>2</sub>CH<sub>2</sub>N), 42.1 (CH<sub>2</sub>N), 61.9 (d, <sup>1</sup>*J*<sub>CP</sub> = 71.2, C<sub>1</sub>), 123.5 (d, *J*<sub>CP</sub> = 2.0, C<sub>4</sub>), 123.8 (d, <sup>3</sup>*J*<sub>CP</sub> = 0.9, C<sub>7</sub>), 124.2 (d, <sup>3</sup>*J*<sub>CP</sub> = 13.9, C<sub>3</sub>'), 126.3 (d, <sup>1</sup>*J*<sub>CP</sub> = 99.5, C<sub>1</sub>'), 126.5 (d, <sup>1</sup>*J*<sub>CP</sub> = 94.7, C<sub>1</sub>''), 126.6 (d, <sup>2</sup>*J*<sub>CP</sub> = 4.1, C<sub>2</sub>'), 127.1 (C<sub>6</sub>'), 128.3 (C<sub>5</sub>'), 128.3 (d, <sup>3</sup>*J*<sub>CP</sub> = 11.4, C<sub>3</sub>''), 128.8 (d, *J*<sub>CP</sub> = 1.6, C<sub>5</sub>), 129.4 (d, *J*<sub>CP</sub> = 0.8, C<sub>4</sub>'), 131.0 (d, *J*<sub>CP</sub> = 1.5, C<sub>6</sub>), 132.3 (d, <sup>2</sup>*J*<sub>CP</sub> = 8.3, C<sub>2</sub>''), 132.5 (d, <sup>3</sup>*J*<sub>CP</sub> = 11.0, C<sub>8</sub>'), 132.9 (d, *J*<sub>CP</sub> = 2.9, C<sub>3a</sub>), 133.3 (d, *J*<sub>CP</sub> = 3.3, C<sub>4</sub>''), 134.00 (d, *J*<sub>CP</sub> = 3.4, C<sub>7</sub>'), 134.02 (d, <sup>2</sup>*J*<sub>CP</sub> = 4.9, C<sub>9</sub>'), 134.1 (d, <sup>3</sup>*J*<sub>CP</sub> = 4.3, C<sub>10</sub>'), 138.5 (d, <sup>2</sup>*J*<sub>CP</sub> = 2.1, C<sub>7a</sub>), 168.3 (d, <sup>3</sup>*J*<sub>CP</sub> = 1.8, C<sub>3</sub>); <sup>31</sup>P (CDCl<sub>3</sub>) δ 34.8; [M+H]<sup>+</sup><sub>found</sub> = 440.1788, C<sub>28</sub>H<sub>27</sub>NO<sub>2</sub>P requires 440.1773.

### General procedure for the synthesis of diphenyl (2-butyl-3-oxo-2,3-dihydro-2*H*-isoindol-1-yl)phosphine (20)

A mixture of 1.0 mmol (0.39 g) of diphenyl (2-butyl-3-oxo-2,3-dihydro-2*H*-isoindol-1-yl)phosphine oxide (7a) and 3.0 mmol (0.37 ml) of phenylsilane was irradiated in a sealed tube at 100-140 °C for 2-6 h under N<sub>2</sub> atmosphere in a CEM® Discover Microwave reactor equipped with a pressure controller. The product (20) was utilized without work-up in the next reactions.

### General procedure for the synthesis of diphenyl (2-butyl-3-oxo-2,3-dihydro-2*H*-isoindol-1-yl)phosphine sulphide (21)

A mixture of 1.0 mmol (0.37 g) of diphenyl (2-butyl-3-oxo-2,3-dihydro-2*H*-isoindol-1-yl)phosphine (20) and 1.2 mmol (0.30 g) of sulphur in 10 mL of degassed dichloromethane was stirred at 25 °C for 12 h under N<sub>2</sub> atmosphere. The product 21 was obtained by column chromatography using silica gel as the absorbent and dichloromethane:methanol (97:3) as the eluent.

### Diphenyl (2-butyl-3-oxo-2,3-dihydro-2*H*-isoindol-1-yl)phosphine sulphide (21)

Yield: 81% (0.42 g), white crystal; Mp: 184–186 °C; <sup>1</sup>H NMR (CDCl<sub>3</sub>) δ 0.79 (t, *J*<sub>HH</sub> = 7.3, 3H, CH<sub>3</sub>(CH<sub>2</sub>)<sub>3</sub>N), 0.93–1.16 (m, 2H, CH<sub>2</sub>(CH<sub>2</sub>)<sub>2</sub>N), 1.33–1.56 (m, 2H, CH<sub>2</sub>CH<sub>2</sub>N), 2.66–2.82 (m, 1H, CH<sub>A</sub>, CH<sub>2</sub>N), 3.82–3.99 (m, 1H, CH<sub>B</sub>, CH<sub>2</sub>N), 5.64 (d, 1H, <sup>2</sup>*J*<sub>HP</sub> = 3.1, C<sub>1</sub>H), 7.04 (d, 1H, *J*<sub>HH</sub> = 7.7, ArH), 7.20–7.30 (m, 1H, ArH), 7.31–7.62 (m, 7H, ArH), 7.64–7.81 (m, 3H, ArH), 7.82–7.95 (m, 2H, ArH); <sup>13</sup>C NMR (CDCl<sub>3</sub>) δ 13.6 (CH<sub>3</sub>(CH<sub>2</sub>)<sub>3</sub>N), 19.8 (CH<sub>2</sub>(CH<sub>2</sub>)<sub>2</sub>N), 29.8 (CH<sub>2</sub>CH<sub>2</sub>N), 41.4 (CH<sub>2</sub>N), 63.5 (d, <sup>1</sup>*J*<sub>CP</sub> = 53.3, C<sub>1</sub>), 123.5 (d, *J*<sub>CP</sub> = 1.5, C<sub>4</sub>), 124.1 (d, <sup>3</sup>*J*<sub>CP</sub> = 2.7, C<sub>7</sub>), 128.0 (d, <sup>1</sup>*J*<sub>CP</sub> = 77.5, C<sub>1</sub><sup>I</sup>), 128.6 (d, <sup>3</sup>*J*<sub>CP</sub> = 11.9, C<sub>3</sub><sup>I</sup>), 128.86 (d, <sup>3</sup>*J*<sub>CP</sub> = 12.1, C<sub>3</sub><sup>III</sup>), 128.87 (d, *J*<sub>CP</sub> = 1.7, C<sub>5</sub>), 129.8 (d, <sup>1</sup>*J*<sub>CP</sub> = 77.9, C<sub>1</sub><sup>II</sup>), 130.8 (d, *J*<sub>CP</sub> = 2.5, C<sub>6</sub>), 130.0 (d, <sup>2</sup>*J*<sub>CP</sub> = 9.9, C<sub>2</sub><sup>I</sup>), 132.1 (d, <sup>2</sup>*J*<sub>CP</sub> = 9.3, C<sub>2</sub><sup>II</sup>), 132.36 (d, *J*<sub>CP</sub> = 3.0, C<sub>4</sub><sup>I</sup>), 132.44 (d, *J*<sub>CP</sub> = 3.0, C<sub>4</sub><sup>II</sup>), 132.7 (d, <sup>3</sup>*J*<sub>CP</sub> = 3.0, C<sub>3a</sub>), 138.4 (d, <sup>2</sup>*J*<sub>CP</sub> = 2.8, C<sub>7a</sub>), 169.0 (d, <sup>3</sup>*J*<sub>CP</sub> = 0.9, C<sub>3</sub>); <sup>31</sup>P (CDCl<sub>3</sub>) δ 44.6; [M+H]<sup>+</sup><sub>found</sub> = 406.1338, C<sub>24</sub>H<sub>25</sub>NOPS requires 406.1340.

### General procedure for the synthesis of [diphenyl (2-butyl-3-oxo-2,3-dihydro-2*H*-isoindol-1-yl)phosphine] dichloroplatinum(II) (22)

A mixture of 1.0 mmol (0.37 g) of diphenyl (2-butyl-3-oxo-2,3-dihydro-2*H*-isoindol-1-yl)phosphine (20) and 0.5 mmol (0.24 g) of bis(benzonitrile)dichloroplatinum in 10 mL of degassed dichloromethane was stirred at 25 °C for 12 h under N<sub>2</sub> atmosphere. The product 22

was obtained by column chromatography using silica gel as the absorbent and dichloromethane:methanol (97:3) as the eluent.

**[Diphenyl (2-butyl-3-oxo-2,3-dihydro-2*H*-isoindol-1-yl)phosphine] dichloroplatinum(II) (22)**

Yield: 80% (0.81 g), yellow crystals; characterized as a mixture, **Isomer A**:  $^1\text{H}$  NMR ( $\text{CDCl}_3$ )  $\delta$  0.75 (t,  $J_{\text{HH}} = 7.6$ , 3H,  $\text{CH}_3(\text{CH}_2)_3\text{N}$ ), 0.94–1.11 (m, 2H,  $\text{CH}_2(\text{CH}_2)_2\text{N}$ ), 1.34–1.54 (m, 2H,  $\text{CH}_2\text{CH}_2\text{N}$ ), 3.20–3.31 (m, 1H,  $\text{CH}_\text{A}$ ,  $\text{CH}_2\text{N}$ ), 3.75–4.87 (m, 1H,  $\text{CH}_\text{B}$ ,  $\text{CH}_2\text{N}$ ), 6.67 (d, 1H,  $^2J_{\text{HP}} = 9.5$ ,  $\text{C}_1\text{H}$ ), 7.07–7.48 (m, 11H, ArH), 7.52–7.61 (m, 2H, ArH), 7.63–7.75 (m, 1H, ArH);  $^{13}\text{C}$  NMR ( $\text{CDCl}_3$ )  $\delta$  13.8 ( $\text{CH}_3(\text{CH}_2)_3\text{N}$ ), 19.9 ( $\text{CH}_2(\text{CH}_2)_2\text{N}$ ), 30.6 ( $\text{CH}_2\text{CH}_2\text{N}$ ), 41.4 ( $\text{CH}_2\text{N}$ ), 53.6 (dd,  $^1J_{\text{CP}} = 14.7$ ,  $^3J_{\text{CP}} = 1.3$ ,  $\text{C}_1$ ), 123.4 (d,  $J_{\text{CP}} = 1.8$ ,  $\text{C}_4$ ), 124.7 (d,  $^3J_{\text{CP}} = 0.9$ ,  $\text{C}_7$ ), 128.1 (d,  $^3J_{\text{CP}} = 5.5$ ,  $\text{C}_3^{\text{I}}$ ), 128.2 (d,  $^3J_{\text{CP}} = 5.0$ ,  $\text{C}_3^{\text{II}}$ ), 128.5 (d,  $J_{\text{CP}} = 2.3$ ,  $\text{C}_5$ ), 131.2 (dd,  $^1J_{\text{CP}} = 69.9$ ,  $^3J_{\text{CP}} = 1.1$ ,  $\text{C}_1^{\text{I}}$ ), 131.3 (dd,  $^1J_{\text{CP}} = 74.0$ ,  $^3J_{\text{CP}} = 1.1$ ,  $\text{C}_1^{\text{II}}$ ), 131.5 (d,  $J_{\text{CP}} = 1.9$ ,  $\text{C}_6$ ), 132.7 (d,  $J_{\text{CP}} = 1.4$ ,  $\text{C}_{3\text{a}}$ ), 133.27 (d,  $J_{\text{CP}} = 5.0$ ,  $\text{C}_4^{\text{I}}$ ), 133.32 (d,  $^3J_{\text{CP}} = 5.1$ ,  $\text{C}_4^{\text{II}}$ ), 134.4 (d,  $^2J_{\text{CP}} = 5.5$ ,  $\text{C}_2^{\text{I}}$ ), 134.5 (d,  $^2J_{\text{CP}} = 6.0$ ,  $\text{C}_2^{\text{II}}$ ), 140.1 (d,  $^2J_{\text{CP}} = 2.8$ ,  $\text{C}_{7\text{a}}$ ), 168.4 (d,  $^3J_{\text{CP}} = 0.9$ ,  $\text{C}_3$ );  $^{31}\text{P}$  ( $\text{CDCl}_3$ )  $\delta$  21.2 (t,  $^1J_{\text{CPt}} = 2519$ ); **Isomer B**:  $^1\text{H}$  NMR ( $\text{CDCl}_3$ )  $\delta$  0.77 (t,  $J_{\text{HH}} = 7.7$ , 3H,  $\text{CH}_3(\text{CH}_2)_3\text{N}$ ), 0.94–1.11 (m, 2H,  $\text{CH}_2(\text{CH}_2)_2\text{N}$ ), 1.34–1.54 (m, 2H,  $\text{CH}_2\text{CH}_2\text{N}$ ), 3.20–3.31 (m, 1H,  $\text{CH}_\text{A}$ ,  $\text{CH}_2\text{N}$ ), 3.75–4.87 (m, 1H,  $\text{CH}_\text{B}$ ,  $\text{CH}_2\text{N}$ ), 6.67 (d, 1H,  $^2J_{\text{HP}} = 9.5$ ,  $\text{C}_1\text{H}$ ), 7.07–7.48 (m, 11H, ArH), 7.52–7.61 (m, 2H, ArH), 7.63–7.75 (m, 1H, ArH);  $^{13}\text{C}$  NMR ( $\text{CDCl}_3$ )  $\delta$  13.8 ( $\text{CH}_3(\text{CH}_2)_3\text{N}$ ), 19.9 ( $\text{CH}_2(\text{CH}_2)_2\text{N}$ ), 30.6 ( $\text{CH}_2\text{CH}_2\text{N}$ ), 41.5 ( $\text{CH}_2\text{N}$ ), 53.6 (dd,  $^1J_{\text{CP}} = 15.1$ ,  $^3J_{\text{CP}} = 1.3$ ,  $\text{C}_1$ ), 123.4 (d,  $J_{\text{CP}} = 1.8$ ,  $\text{C}_4$ ), 124.7 (d,  $^3J_{\text{CP}} = 0.9$ ,  $\text{C}_7$ ), 128.1 (d,  $^3J_{\text{CP}} = 5.5$ ,  $\text{C}_3^{\text{I}}$ ), 128.48 (d,  $^3J_{\text{CP}} = 5.0$ ,  $\text{C}_3^{\text{II}}$ ), 128.51 (d,  $J_{\text{CP}} = 2.3$ ,  $\text{C}_5$ ), 131.2 (dd,  $^1J_{\text{CP}} = 69.9$ ,  $^3J_{\text{CP}} = 0.8$ ,  $\text{C}_1^{\text{I}}$ ), 131.3 (dd,  $^1J_{\text{CP}} = 74.3$ ,  $^3J_{\text{CP}} = 0.9$ ,  $\text{C}_1^{\text{II}}$ ), 131.6 (d,  $J_{\text{CP}} = 1.4$ ,  $\text{C}_6$ ), 132.8 (d,  $J_{\text{CP}} = 1.4$ ,  $\text{C}_{3\text{a}}$ ), 133.31 (d,  $J_{\text{CP}} = 4.9$ ,  $\text{C}_4^{\text{I}}$ ), 133.33 (d,  $^3J_{\text{CP}} = 5.1$ ,  $\text{C}_4^{\text{II}}$ ), 134.46 (d,  $^2J_{\text{CP}} = 5.5$ ,  $\text{C}_2^{\text{I}}$ ), 134.50 (d,  $^2J_{\text{CP}} = 6.0$ ,  $\text{C}_2^{\text{II}}$ ), 140.1 (d,  $^2J_{\text{CP}} = 2.8$ ,  $\text{C}_{7\text{a}}$ ), 168.5 (d,  $^3J_{\text{CP}} = 0.9$ ,  $\text{C}_3$ );  $^{31}\text{P}$  ( $\text{CDCl}_3$ )  $\delta$  21.2 (t,  $^1J_{\text{CPt}} = 2519$ );  $[\text{M}+\text{Na}]^+_{\text{found}} = 1033.2107$ ,  $\text{C}_{48}\text{H}_{48}\text{N}_2\text{O}_2\text{P}_2\text{PtNa}$  requires 1033.2087.

### Single crystal X-ray diffraction measurements

Single-crystal X-ray diffraction data of **7a** and **22** were collected on an Agilent Technologies SuperNova Dual diffractometer using Mo-K $\alpha$  radiation ( $\lambda = 0.71073 \text{ \AA}$ ) at 150 K. The data were processed using CrysAlis Pro [S1]. Structure was solved by ShelXT [S2] using intrinsic phasing and refined by a full-matrix least-squares procedure based on  $F^2$  with ShelXL [S3]



using Olex2 program suite [S4]. All the non-hydrogen atoms were refined anisotropically. Hydrogen atoms were readily located in difference Fourier maps, and were subsequently treated as riding atoms in geometrically idealized positions with C–H = 0.95 Å (aromatic), 1.00 Å (methine), 0.99 Å (methylene) or 0.98 Å (methyl), and with  $U_{\text{iso}}(\text{H}) = kU_{\text{eq}}(\text{C})$ , where  $k = 1.5$  for methyl group and 1.2 for all other H atoms. The crystallographic data are listed in Table S1. Deposition Numbers CCDC 2100126 and 2100127 contain the supplementary crystallographic data for this paper. These data are provided free of charge by the joint Cambridge Crystallographic Data Centre and Fachinformationszentrum Karlsruhe Access Structures service [www.ccdc.cam.ac.uk/structures](http://www.ccdc.cam.ac.uk/structures).

**Table S1:** Crystal data and structure refinement for compounds **7a** and **22**.

|                                                                              | <b>7a</b>                                         | <b>22</b>                                                                                       |
|------------------------------------------------------------------------------|---------------------------------------------------|-------------------------------------------------------------------------------------------------|
| <b>CCDC number</b>                                                           | 2100126                                           | 2100127                                                                                         |
| <b>Empirical formula</b>                                                     | C <sub>24</sub> H <sub>24</sub> NO <sub>2</sub> P | C <sub>48</sub> H <sub>48</sub> Cl <sub>2</sub> N <sub>2</sub> O <sub>2</sub> P <sub>2</sub> Pt |
| <b>Formula weight</b>                                                        | 389.41                                            | 1012.81                                                                                         |
| <b><i>T</i>/K</b>                                                            | 150.00(10)                                        | 150.00(10)                                                                                      |
| <b>Crystal system</b>                                                        | monoclinic                                        | monoclinic                                                                                      |
| <b>Space group</b>                                                           | <i>P</i> 2 <sub>1</sub> / <i>c</i>                | <i>P</i> 2 <sub>1</sub> / <i>n</i>                                                              |
| <b><i>a</i>/Å</b>                                                            | 11.7785(7)                                        | 11.3292(4)                                                                                      |
| <b><i>b</i>/Å</b>                                                            | 17.1967(9)                                        | 10.3205(3)                                                                                      |
| <b><i>c</i>/Å</b>                                                            | 11.2241(6)                                        | 18.9713(8)                                                                                      |
| <b><i>α</i>/°</b>                                                            | 90                                                | 90                                                                                              |
| <b><i>β</i>/°</b>                                                            | 115.786(8)                                        | 106.630(4)                                                                                      |
| <b><i>γ</i>/°</b>                                                            | 90                                                | 90                                                                                              |
| <b><i>V</i>/Å<sup>3</sup></b>                                                | 2047.1(2)                                         | 2125.40(14)                                                                                     |
| <b><i>Z</i></b>                                                              | 4                                                 | 2                                                                                               |
| <b><i>D</i><sub>calc</sub>/g cm<sup>-3</sup></b>                             | 1.264                                             | 1.583                                                                                           |
| <b><i>μ</i>/mm<sup>-1</sup></b>                                              | 0.154                                             | 3.544                                                                                           |
| <b><i>F</i>(000)</b>                                                         | 824.0                                             | 1016.0                                                                                          |
| <b>Reflections collected</b>                                                 | 11169                                             | 17175                                                                                           |
| <b>Data/restraints/parameters</b>                                            | 4703/0/254                                        | 4870/0/260                                                                                      |
| <b><i>R</i><sub>int</sub></b>                                                | 0.0317                                            | 0.0411                                                                                          |
| <b>GOF, <i>S</i></b>                                                         | 1.059                                             | 1.062                                                                                           |
| <b><i>R</i><sub>1</sub>, <i>wR</i><sub>2</sub> [<i>I</i> ≥ 2σ(<i>I</i>)]</b> | 0.0429, 0.1008                                    | 0.0260, 0.0559                                                                                  |
| <b><i>R</i><sub>1</sub>, <i>wR</i><sub>2</sub> [all data]</b>                | 0.0597, 0.1157                                    | 0.0361, 0.0614                                                                                  |
| <b>Δ<i>ρ</i><sub>min</sub>, Δ<i>ρ</i><sub>max</sub> [e Å<sup>-3</sup>]</b>   | 0.31/−0.31                                        | 0.93/−1.23                                                                                      |

**Table S2.** Hydrogen bond geometry in **7a** and **22**.

| D–H⋯A        | D–H (Å) | H⋯A (Å) | D⋯A (Å)    | D–H⋯A (°) | Symmetry code                                       |
|--------------|---------|---------|------------|-----------|-----------------------------------------------------|
| <b>7a</b>    |         |         |            |           |                                                     |
| C1–H1⋯O1     | 1.00    | 2.18    | 3.1622(18) | 166.7     | $x, \frac{1}{2} - y, -\frac{1}{2} + z$              |
| C15–H15⋯O2   | 0.95    | 2.54    | 3.256(2)   | 132.1     | $1 - x, -\frac{1}{2} + y, \frac{1}{2} - z$          |
| C22–H22⋯O2   | 0.95    | 2.32    | 3.248(2)   | 164.1     | $2 - x, -\frac{1}{2} + y, \frac{1}{2} - z$          |
| C11–H11b⋯Cg4 | 0.99    | 2.99    | 3.843(2)   | 145       | $x, y, z$                                           |
| C16–H16⋯Cg4  | 0.95    | 2.74    | 3.616(2)   | 154       | $1 - x, -y, 1 - z$                                  |
| <b>22</b>    |         |         |            |           |                                                     |
| C21–H21⋯O1   | 0.95    | 2.48    | 3.139(4)   | 127       | $\frac{1}{2} + x, \frac{1}{2} - y, \frac{1}{2} + z$ |
| C24–H24⋯Cg2  | 0.95    | 2.74    | 3.616(2)   | 154       | $-x, 1 - y, 1 - z$                                  |

Cg4 (for **7a**) and Cg2 (for **22**) are C19–C24 and C2–C7 ring centroids, respectively.

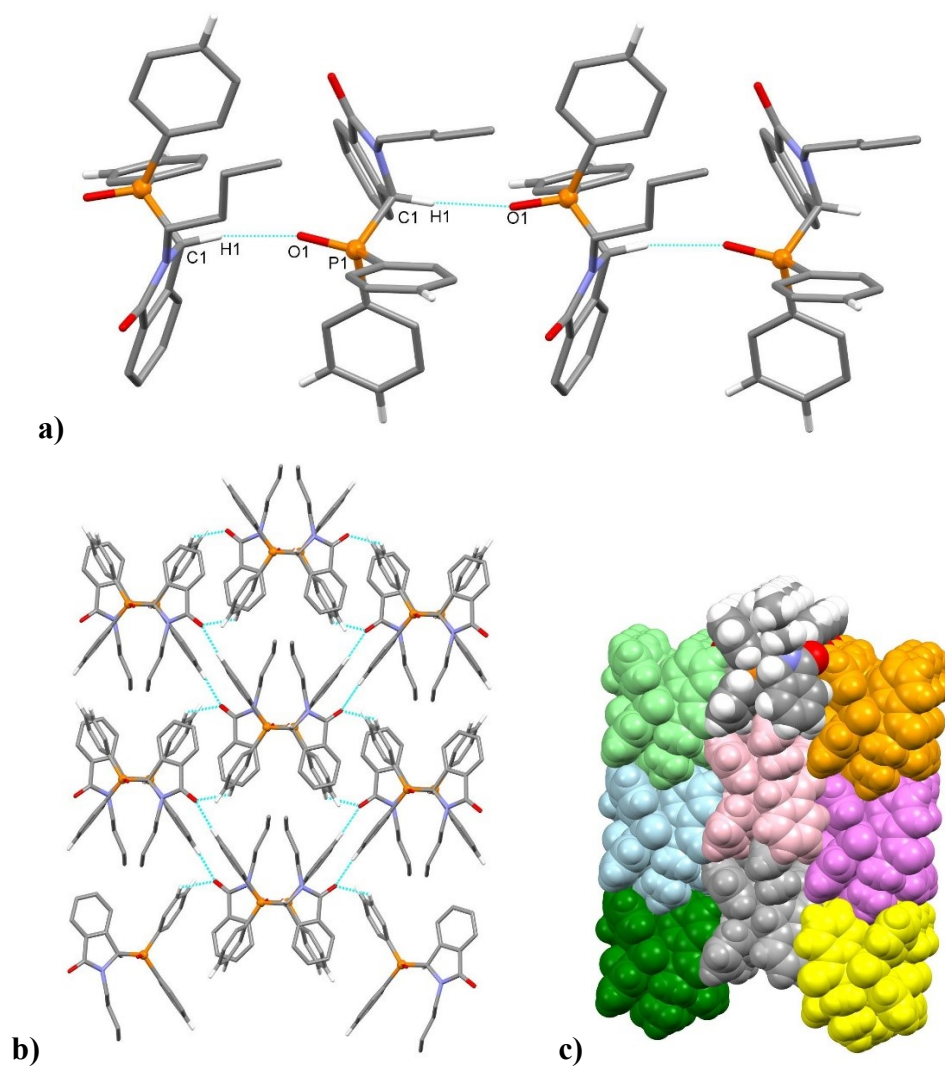

**Figure S1.** (a) Hydrogen-bonded chain formation in **7a** via C1–H1⋯O1=P1 interactions along *c*-axis. (b) Hydrogen-bonded network along *ab*-plane formed by C15–H15⋯O2 and C22–H22⋯O2 interactions.

C22–H22...O2 interactions. (c) Packing of chains (arbitrary colors). Blue dashed lines indicate hydrogen bonds.

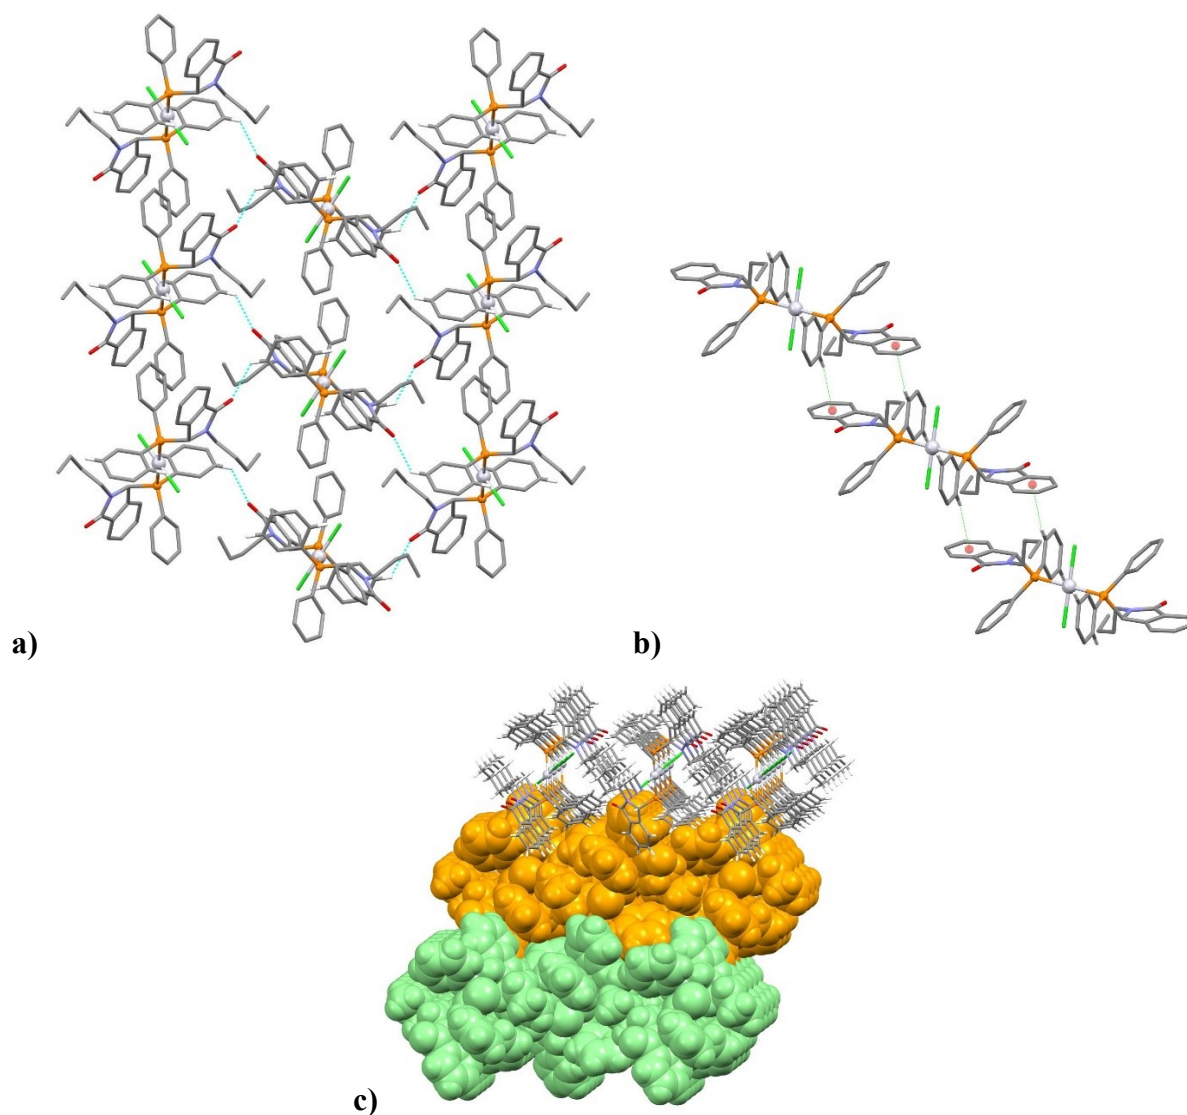

**Figure S2.** (a) Hydrogen-bonded layer formation in **22** via C21–H21...O1 interactions. (b) C24–H24...Cg2 interactions. (c) Packing of layers (arbitrary colours). Blue dashed lines indicate hydrogen bonds.

# <sup>1</sup>H NMR, <sup>13</sup>C NMR and <sup>31</sup>P NMR spectra

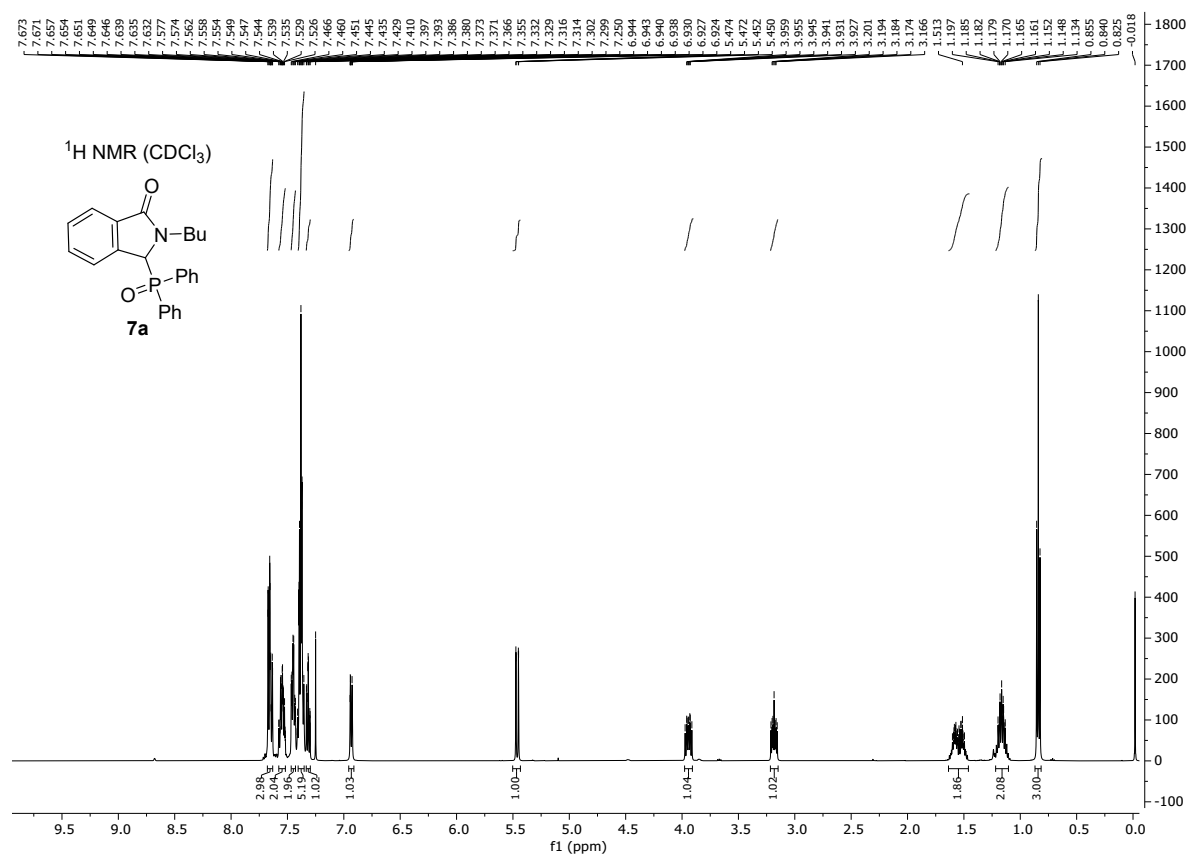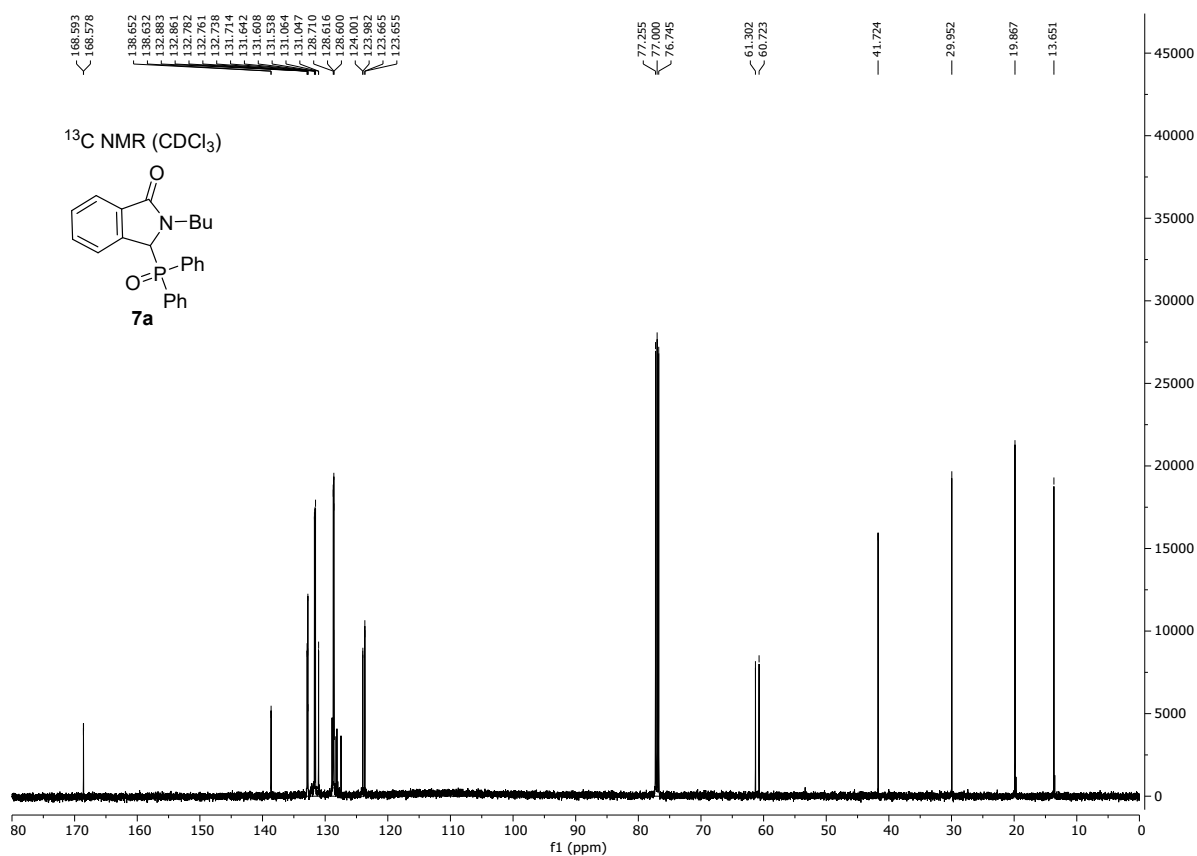

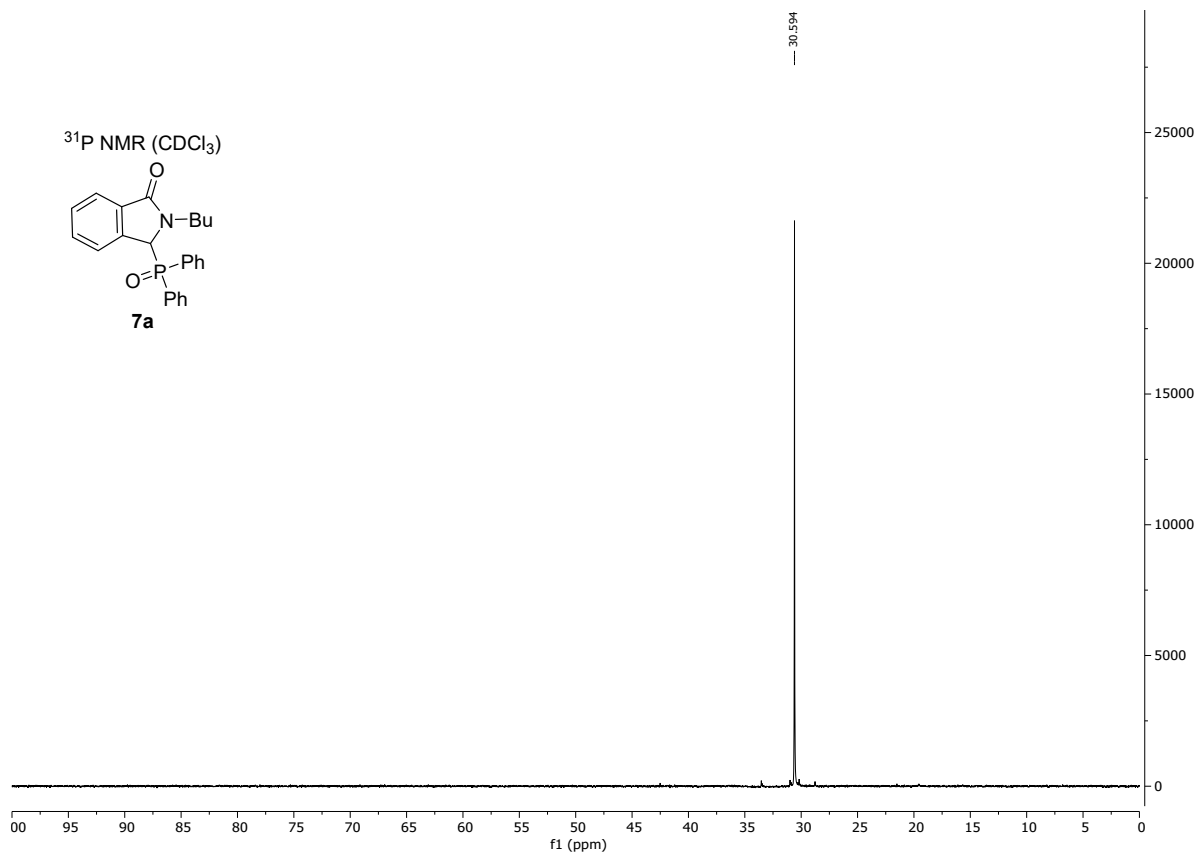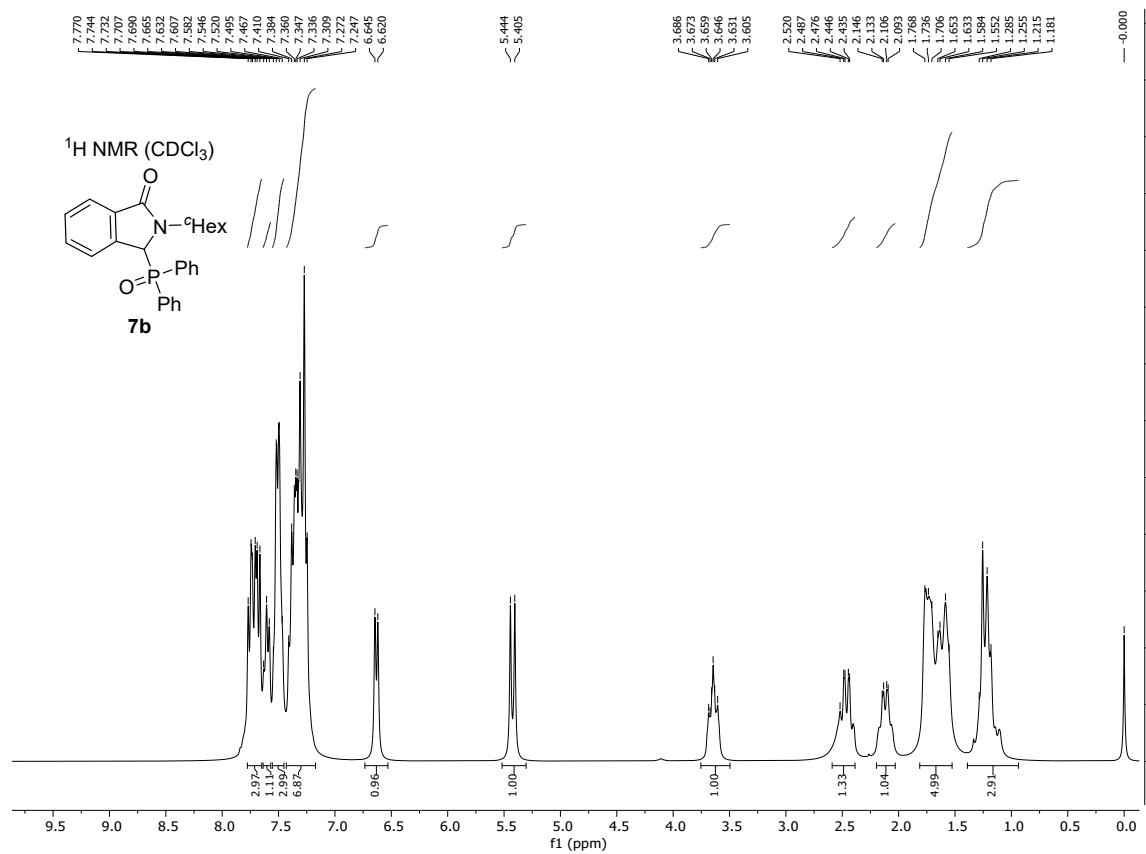

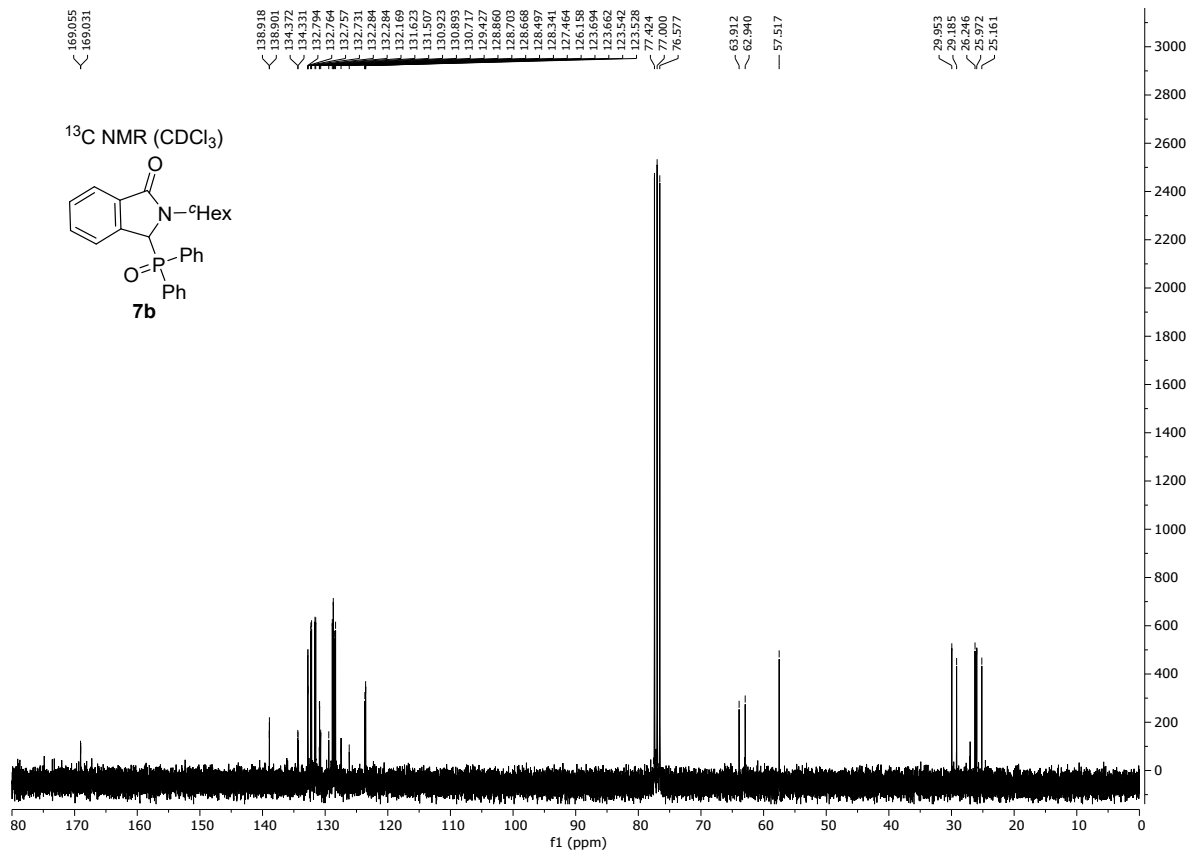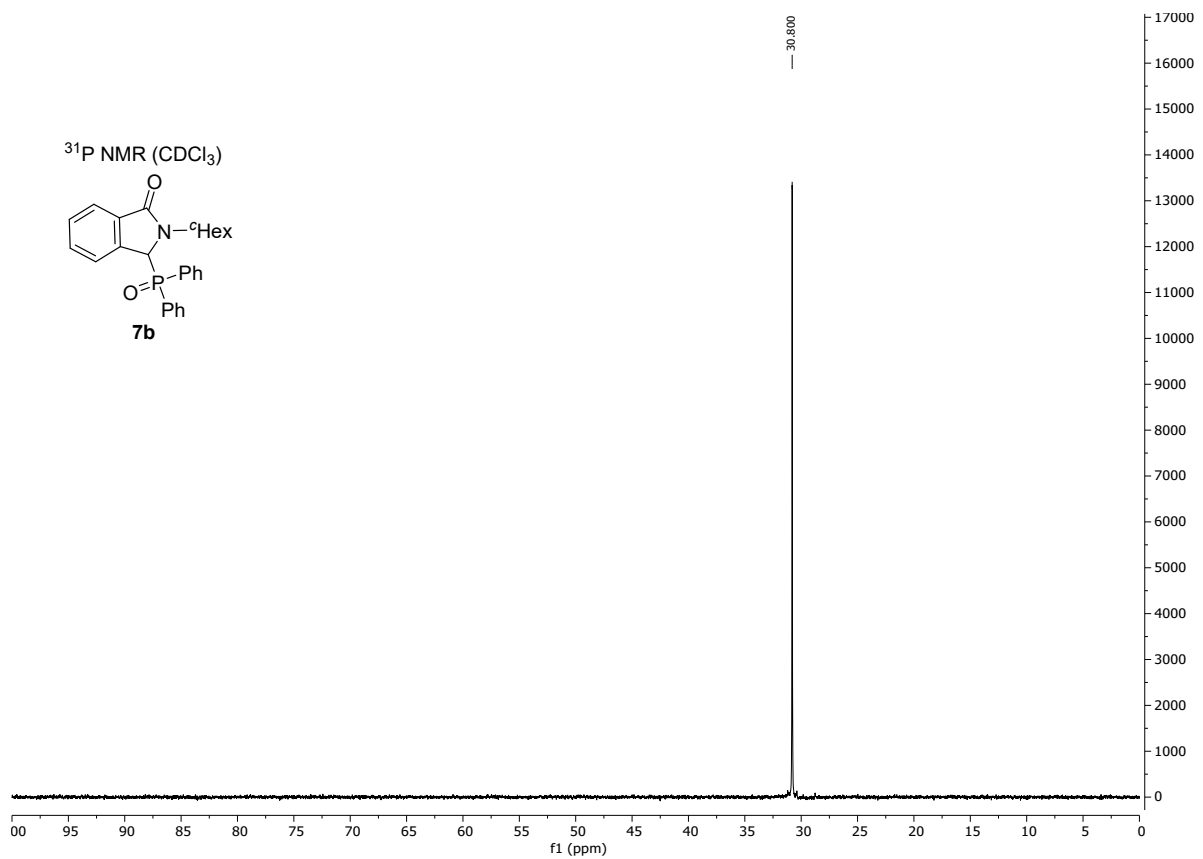

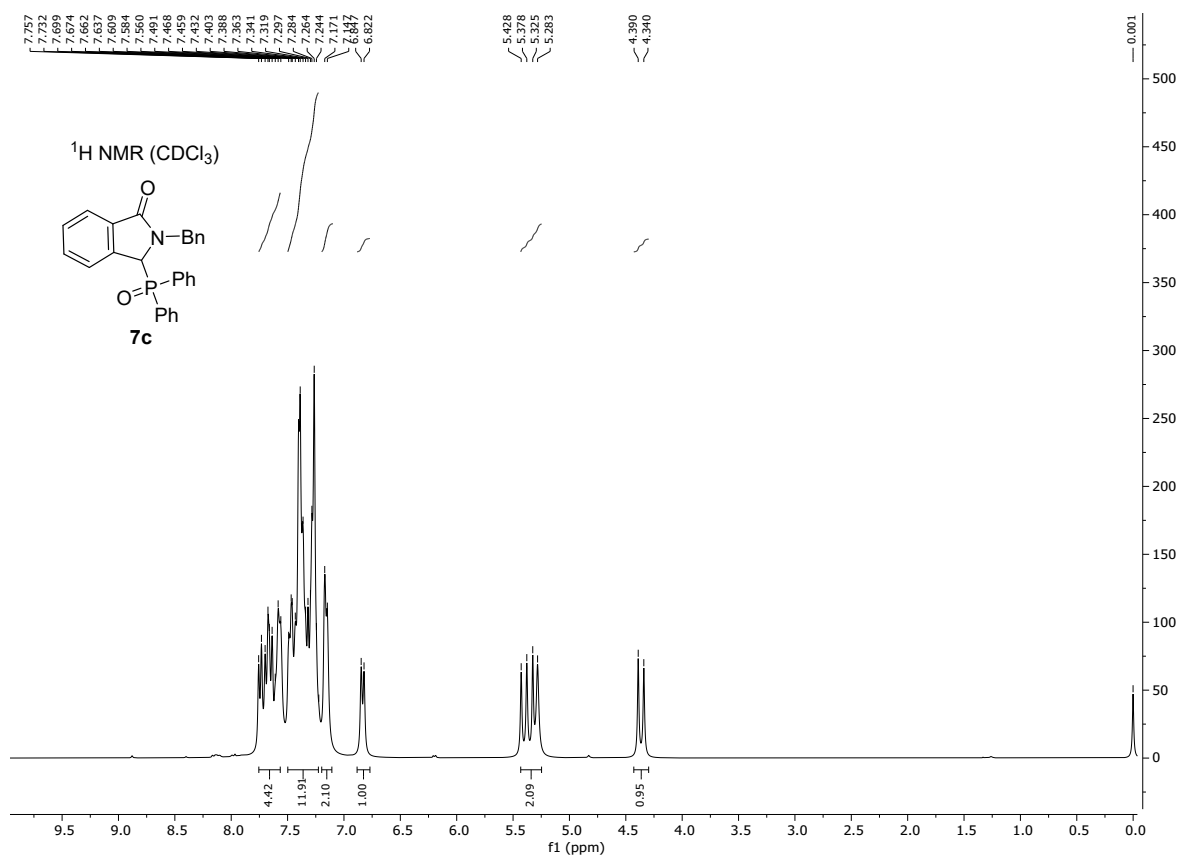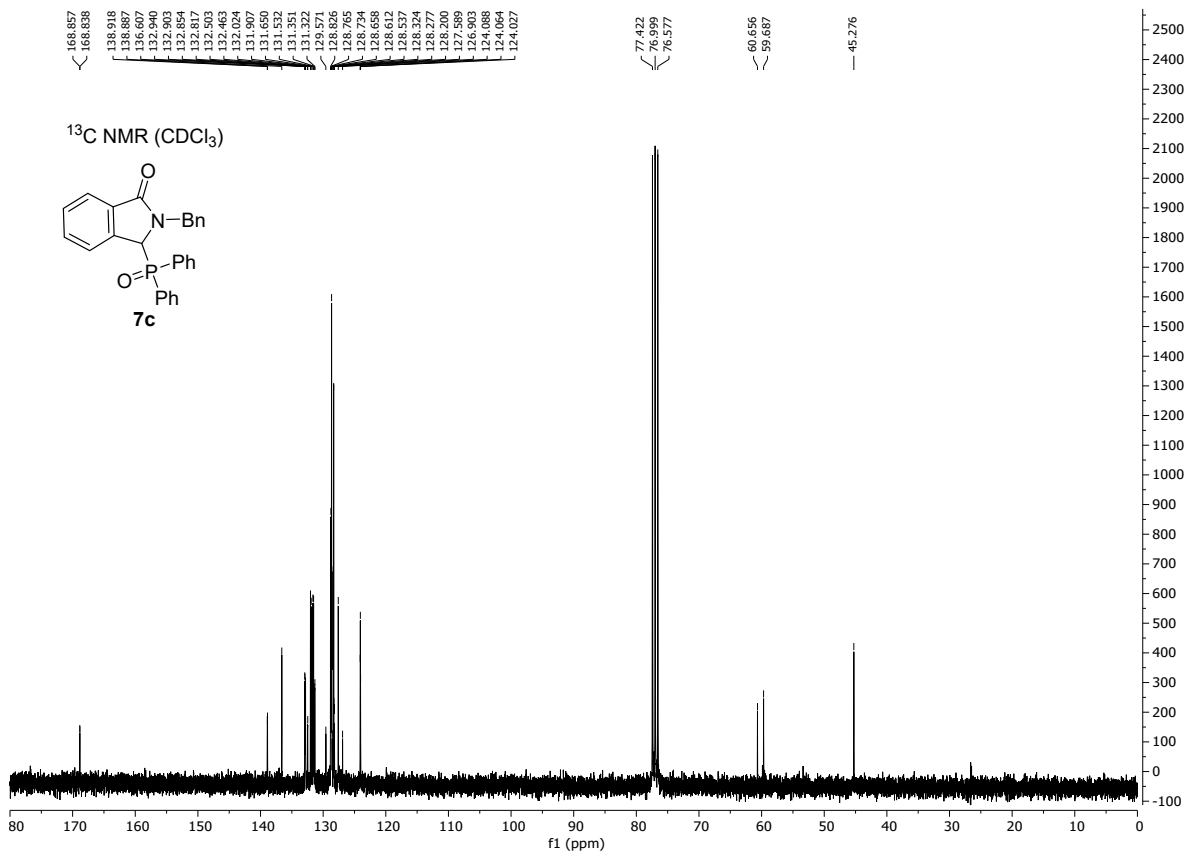

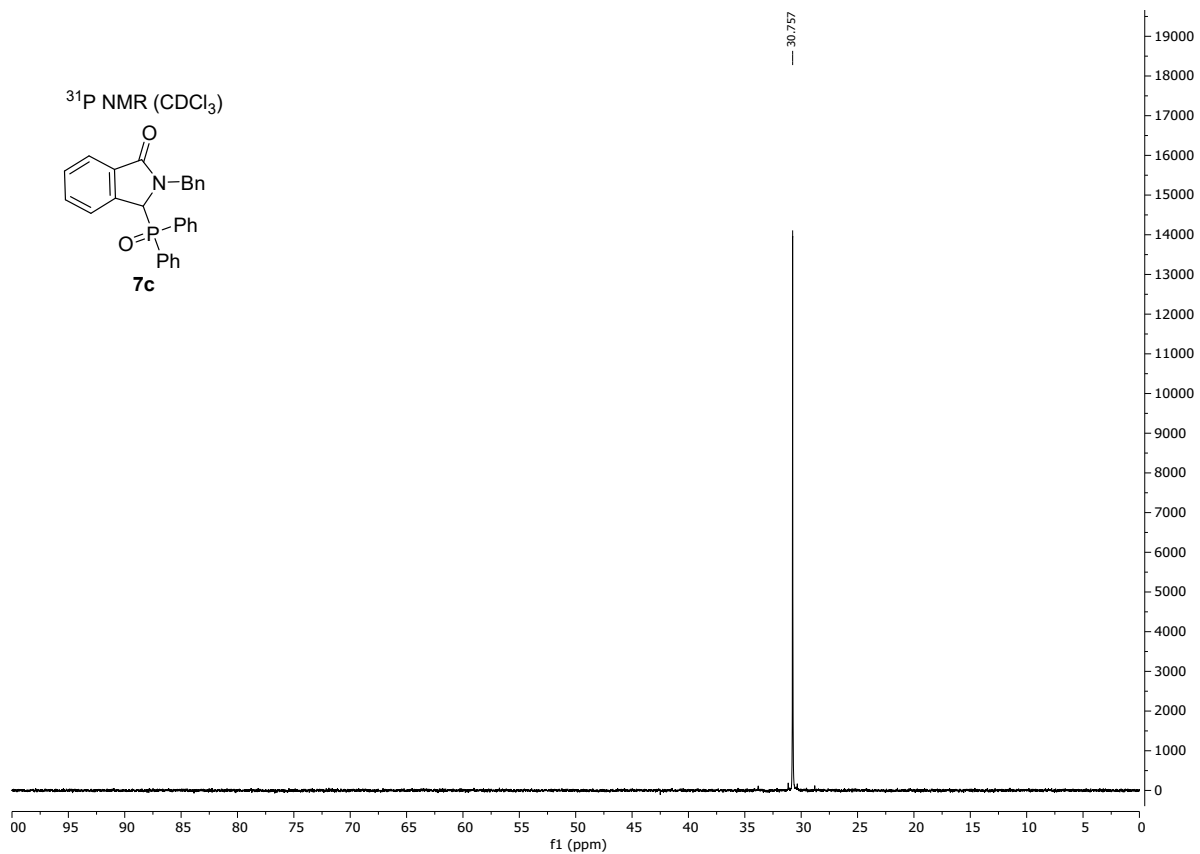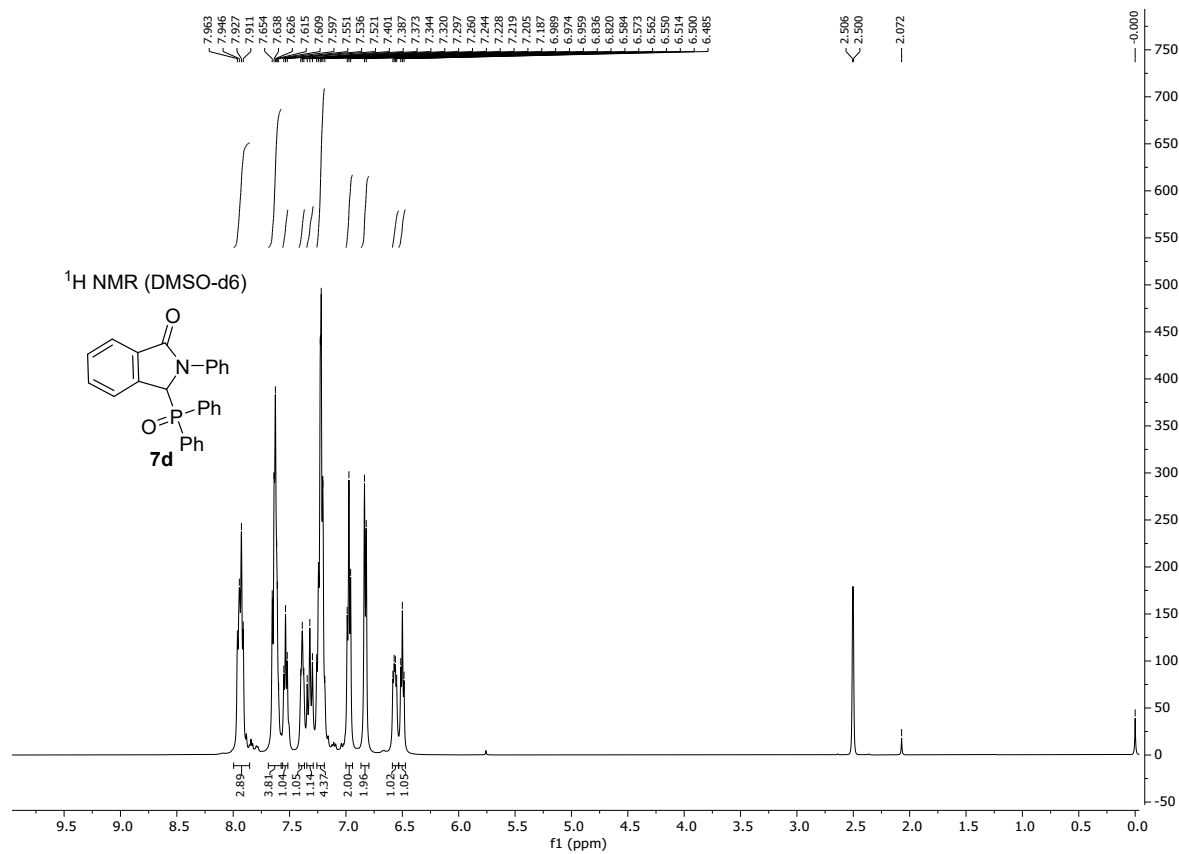



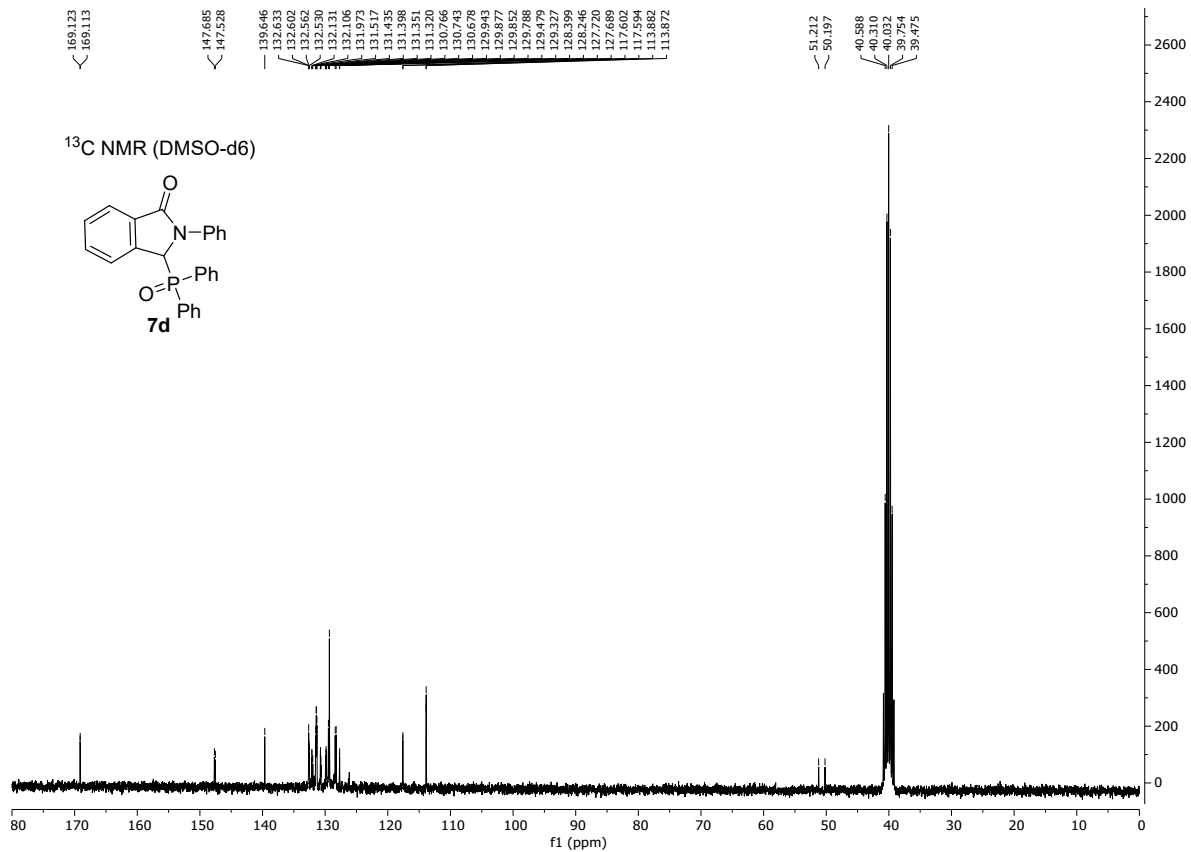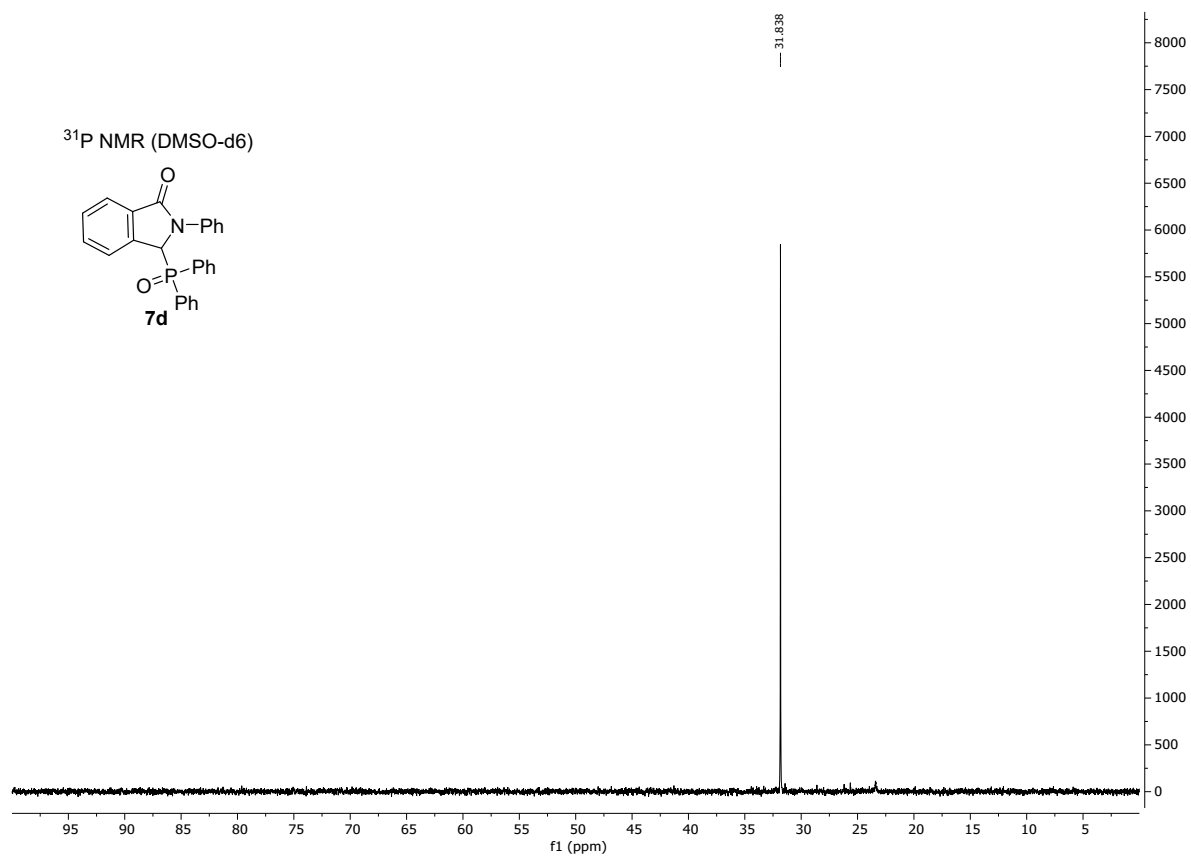

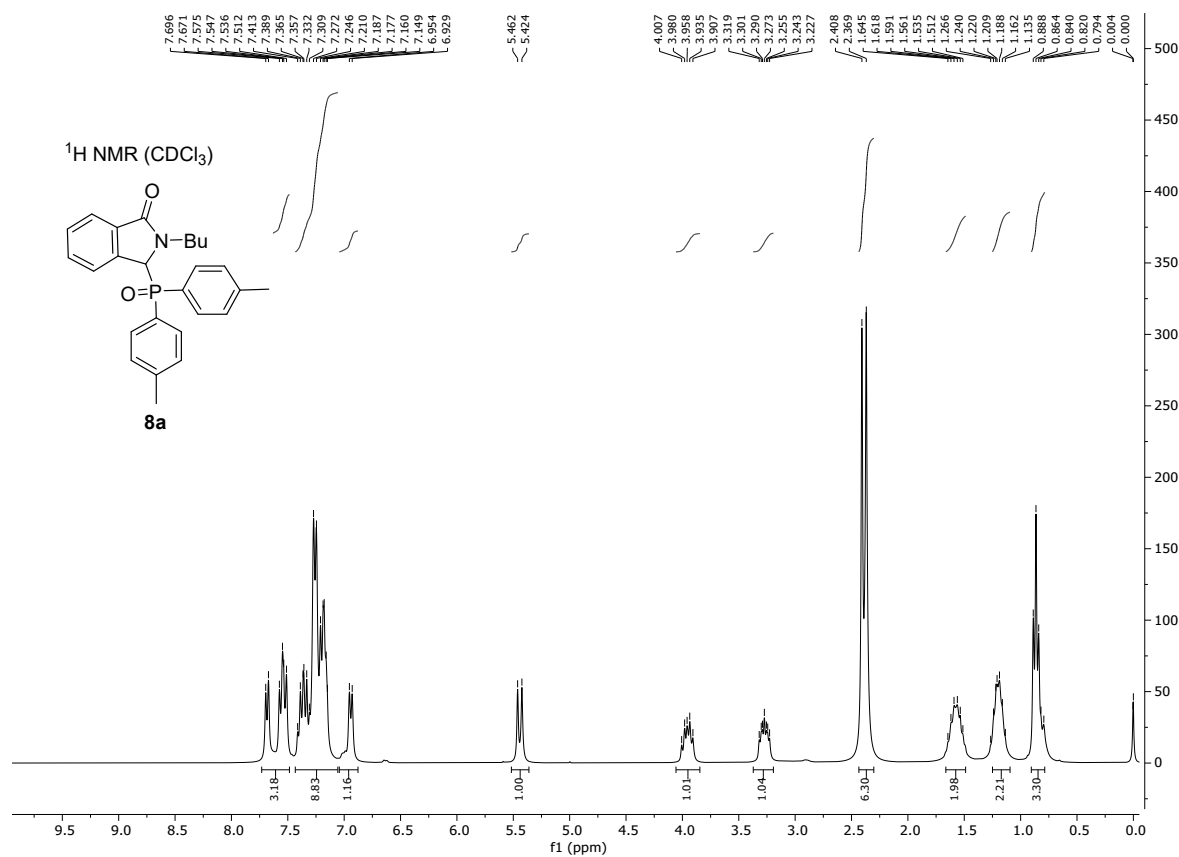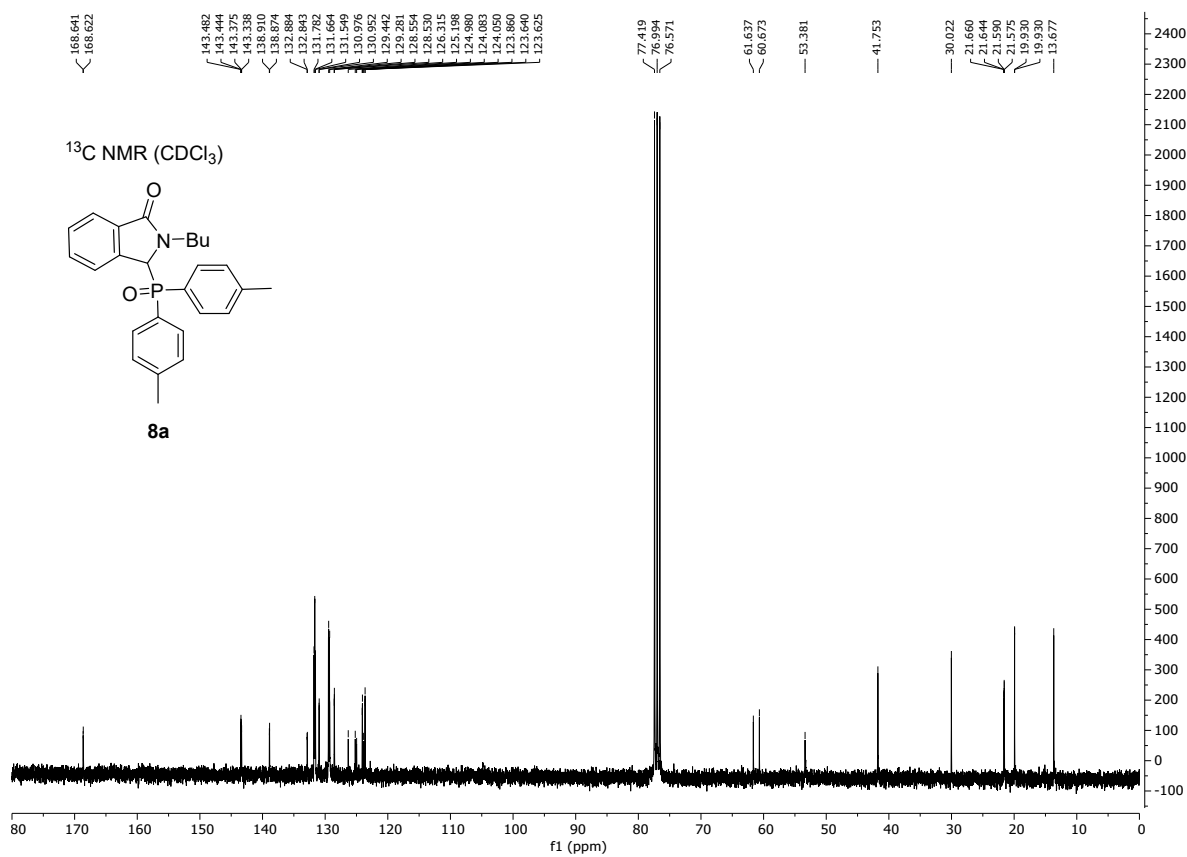

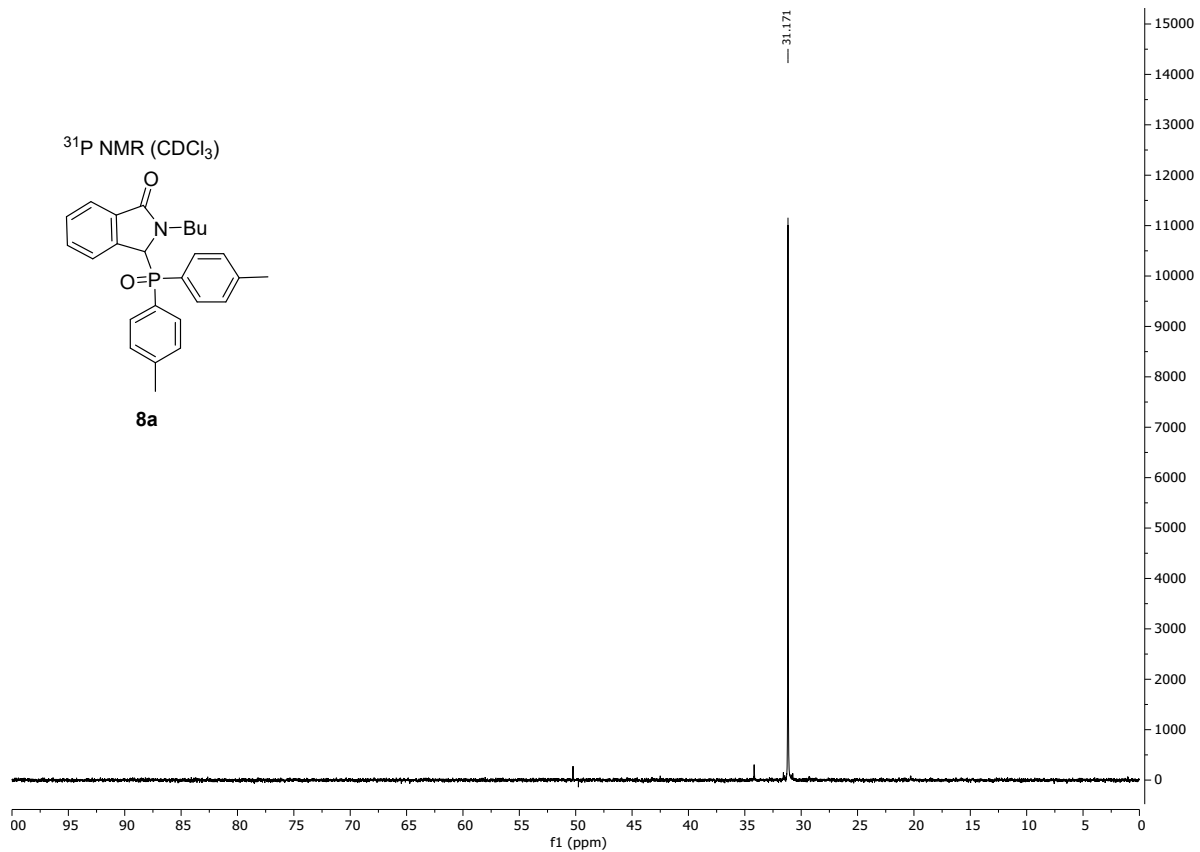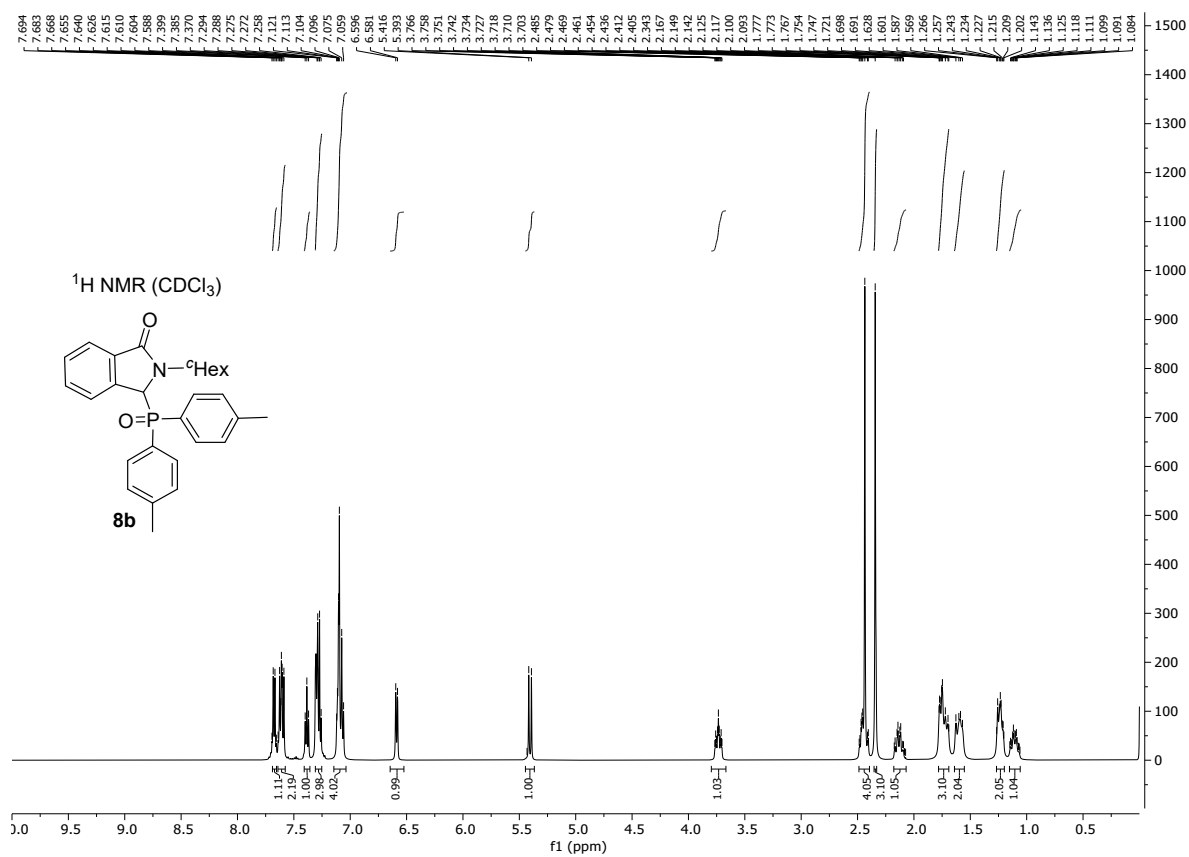

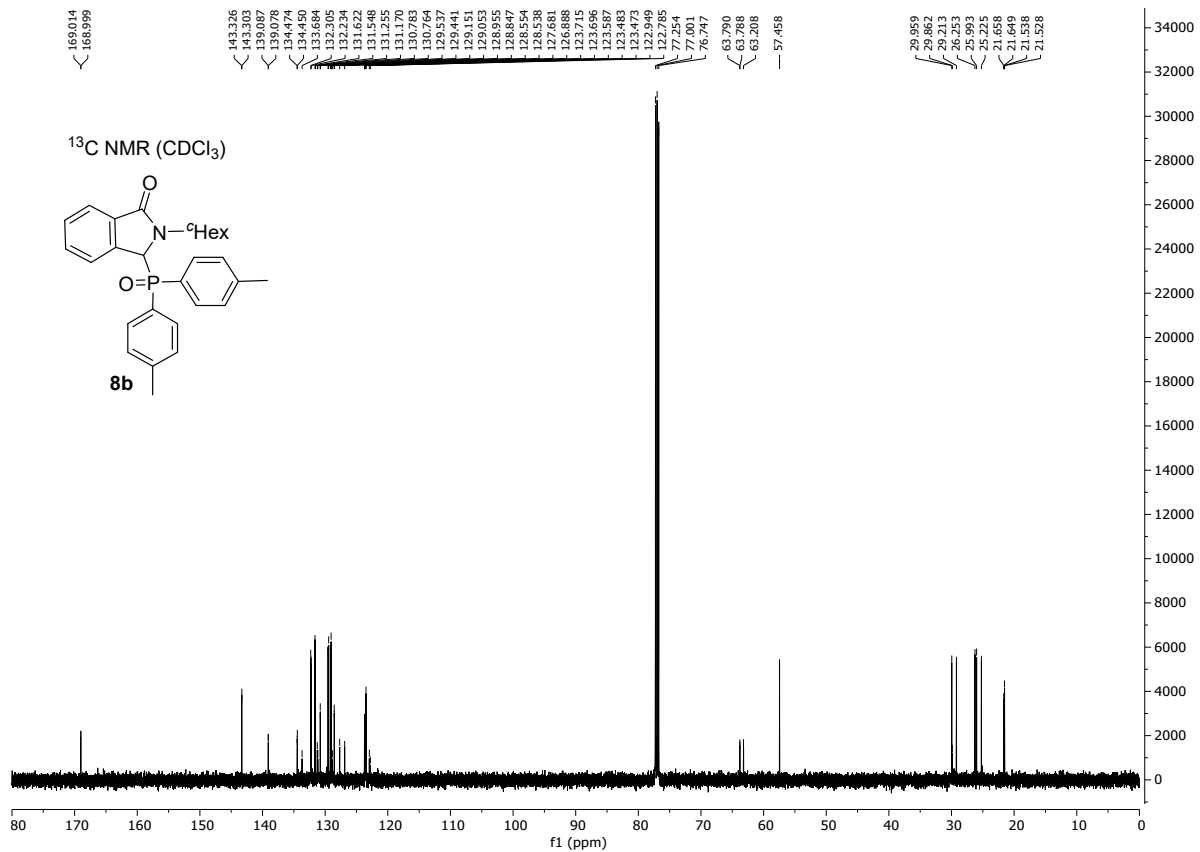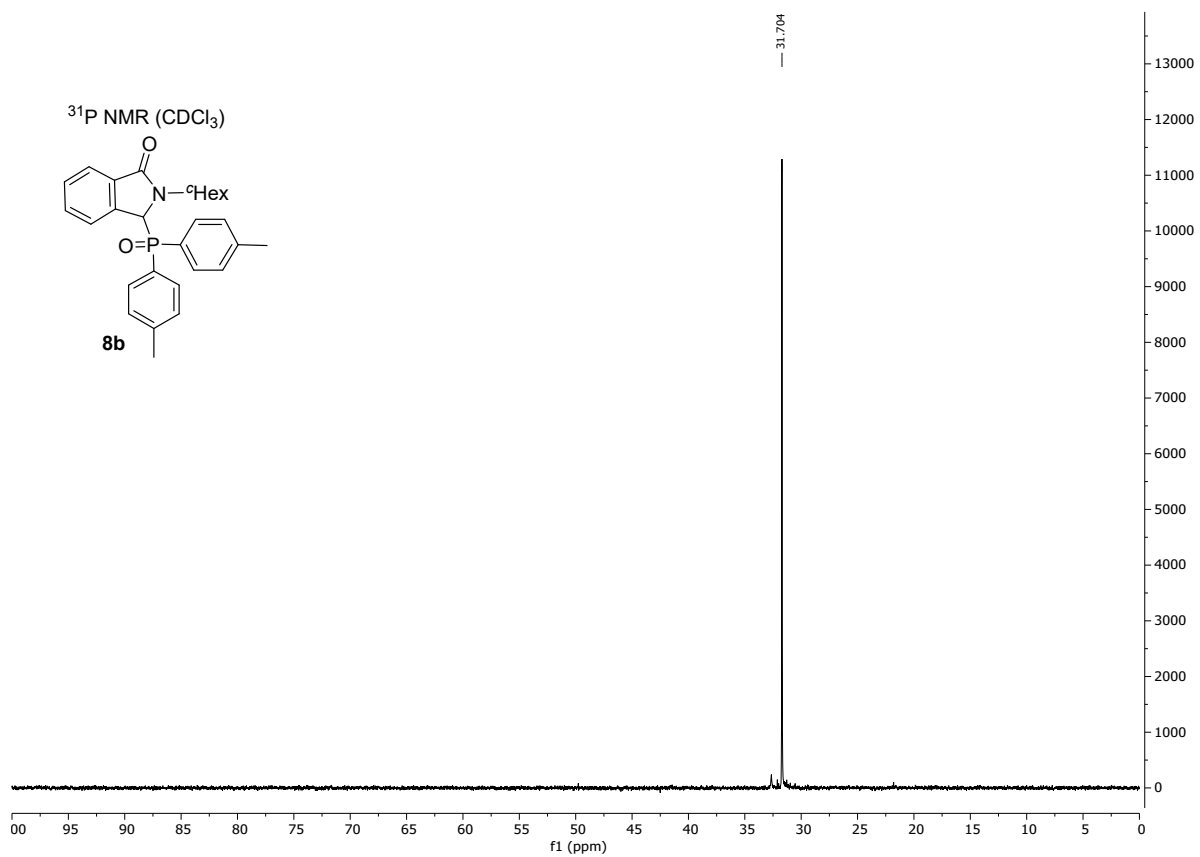

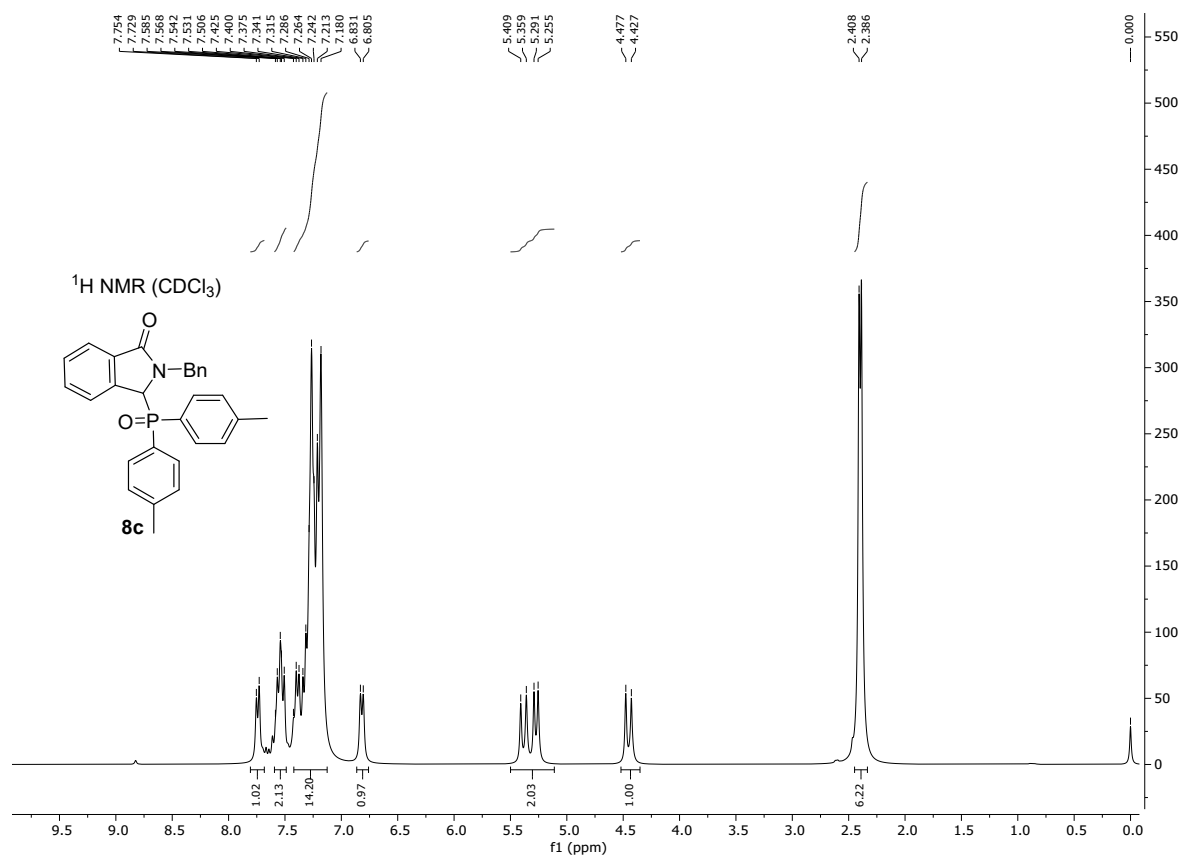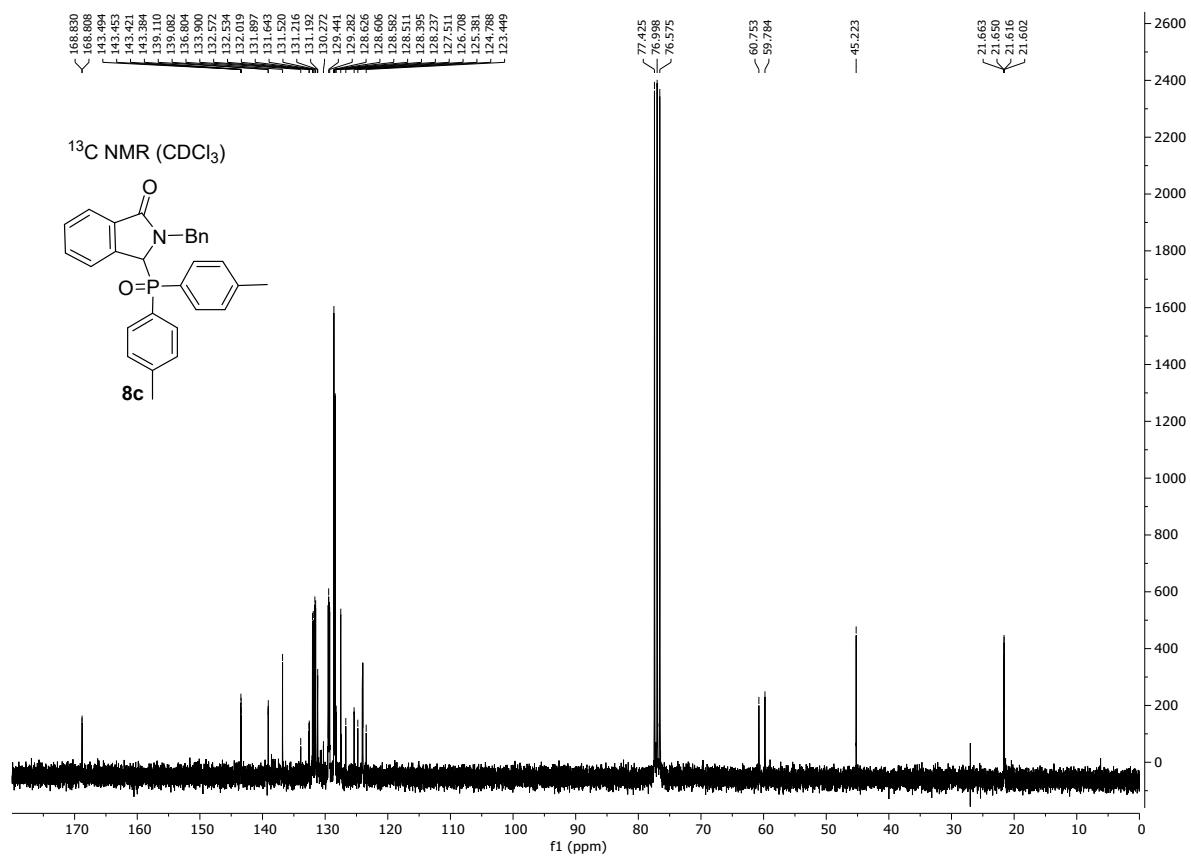

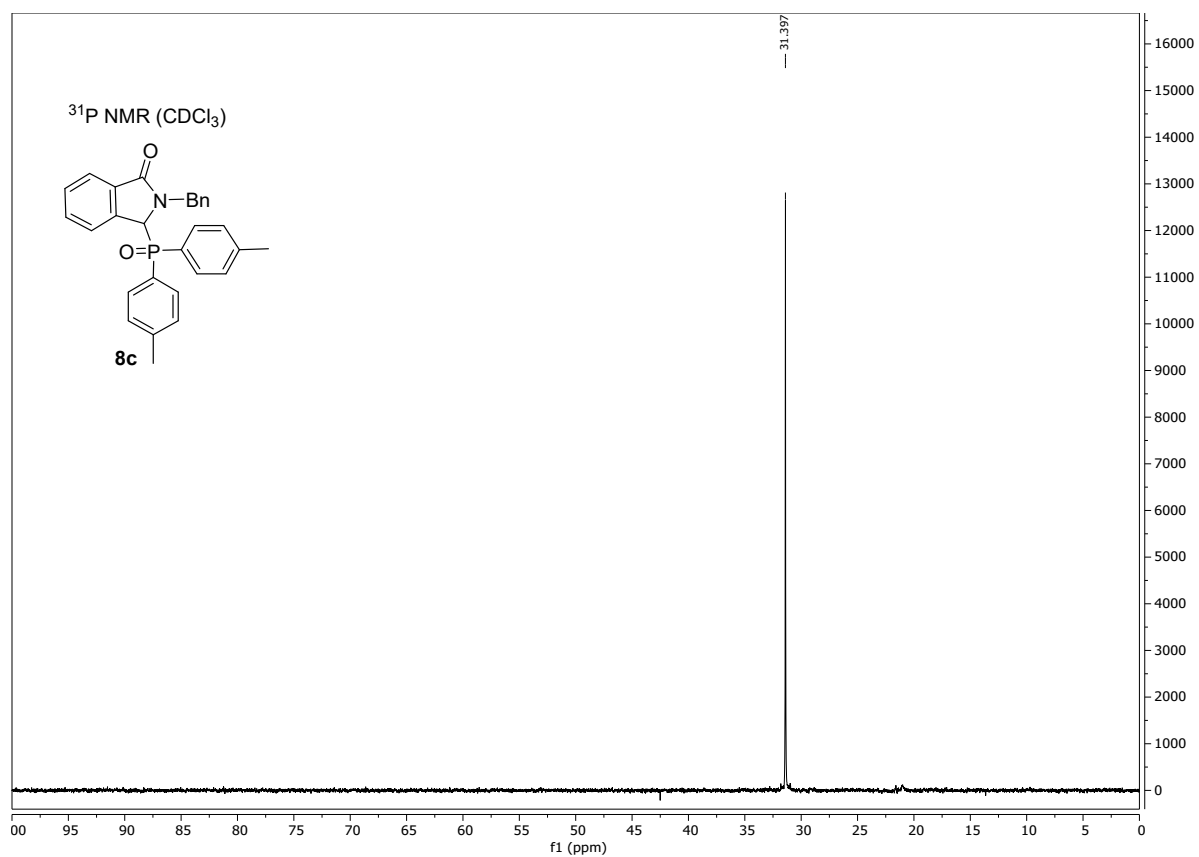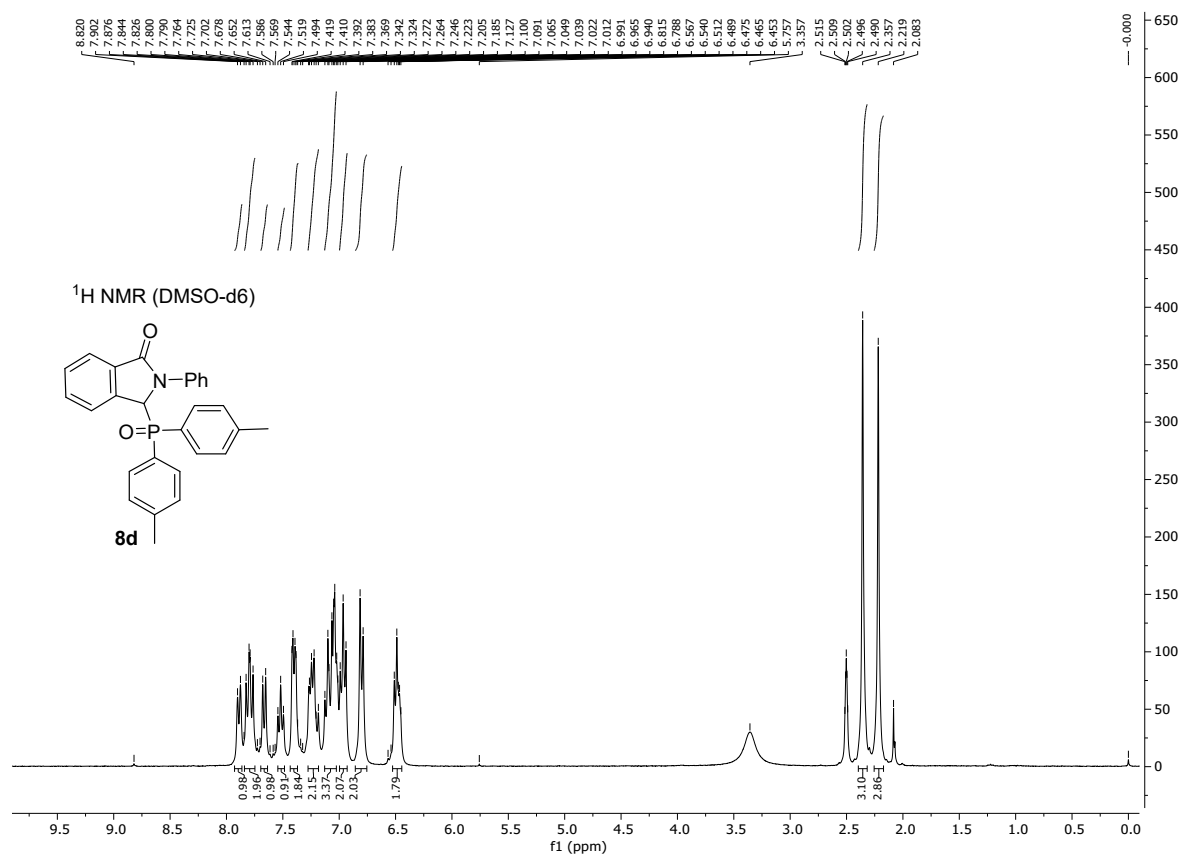

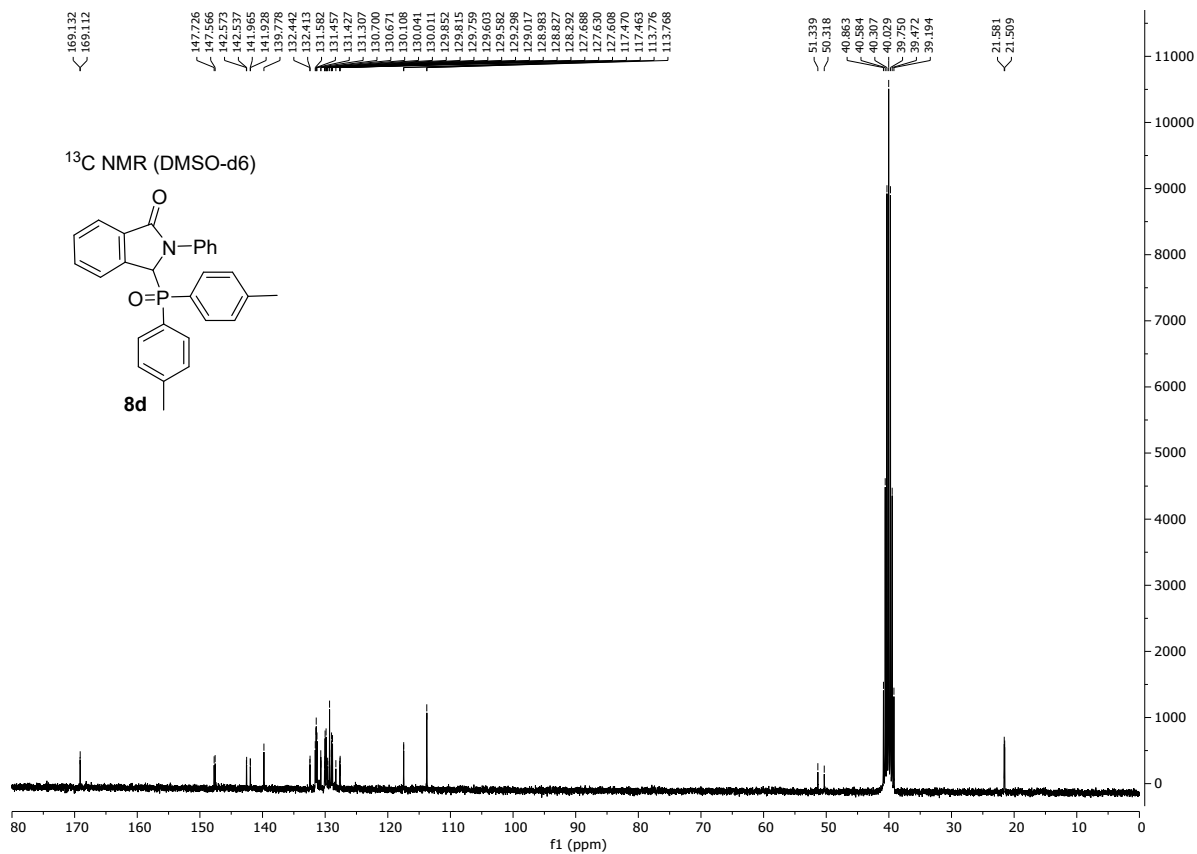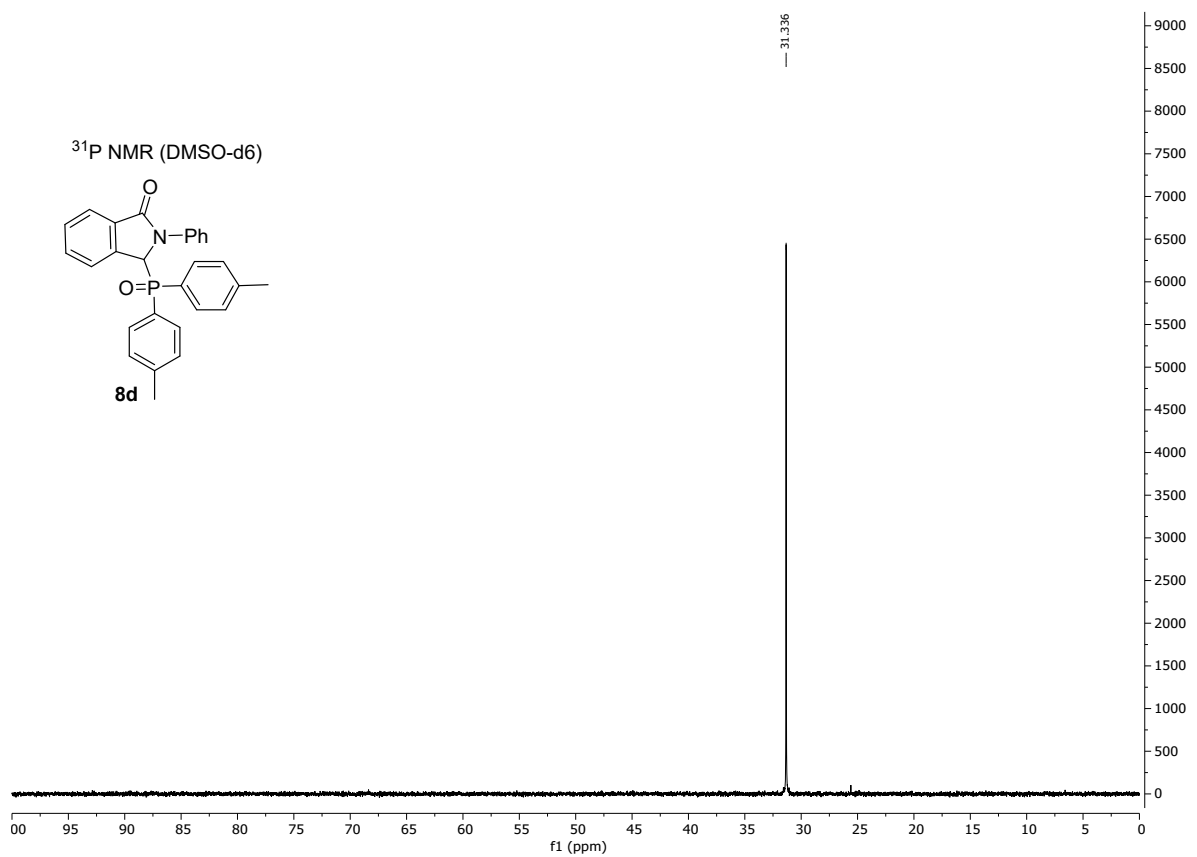

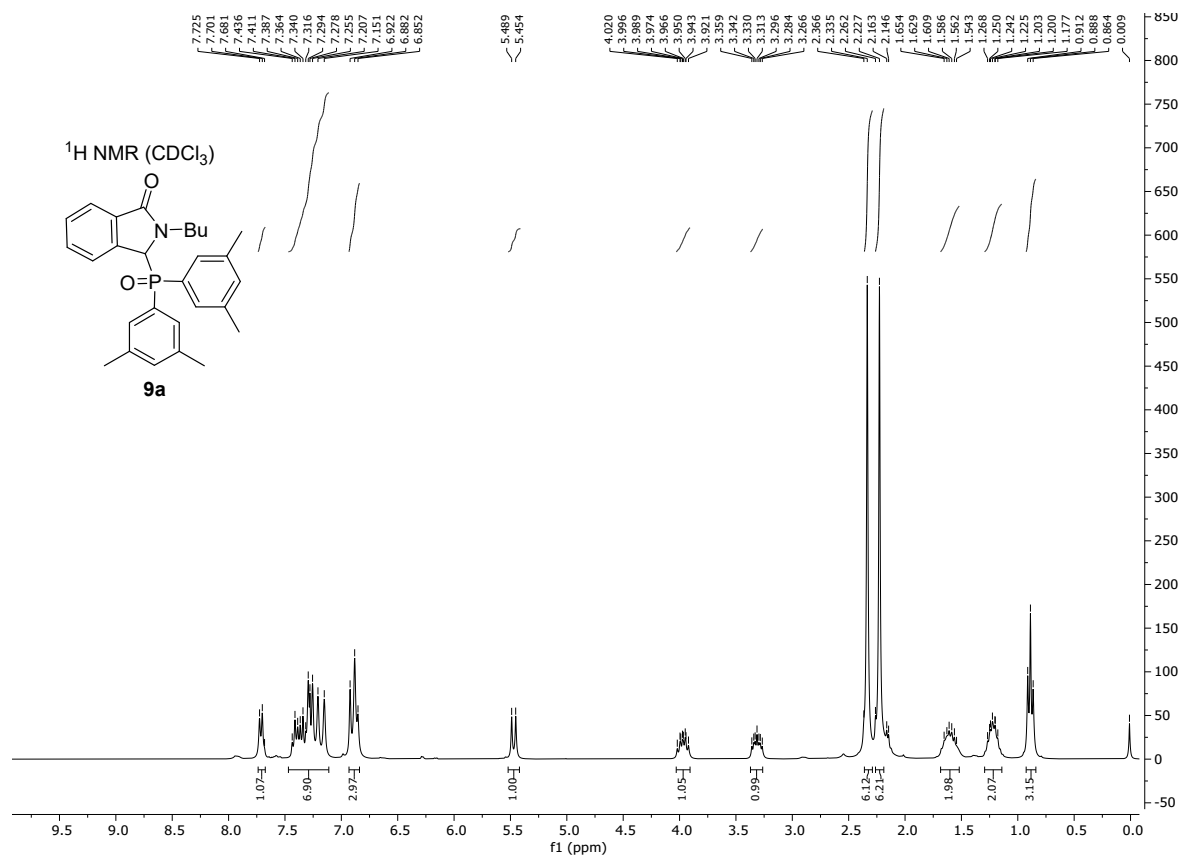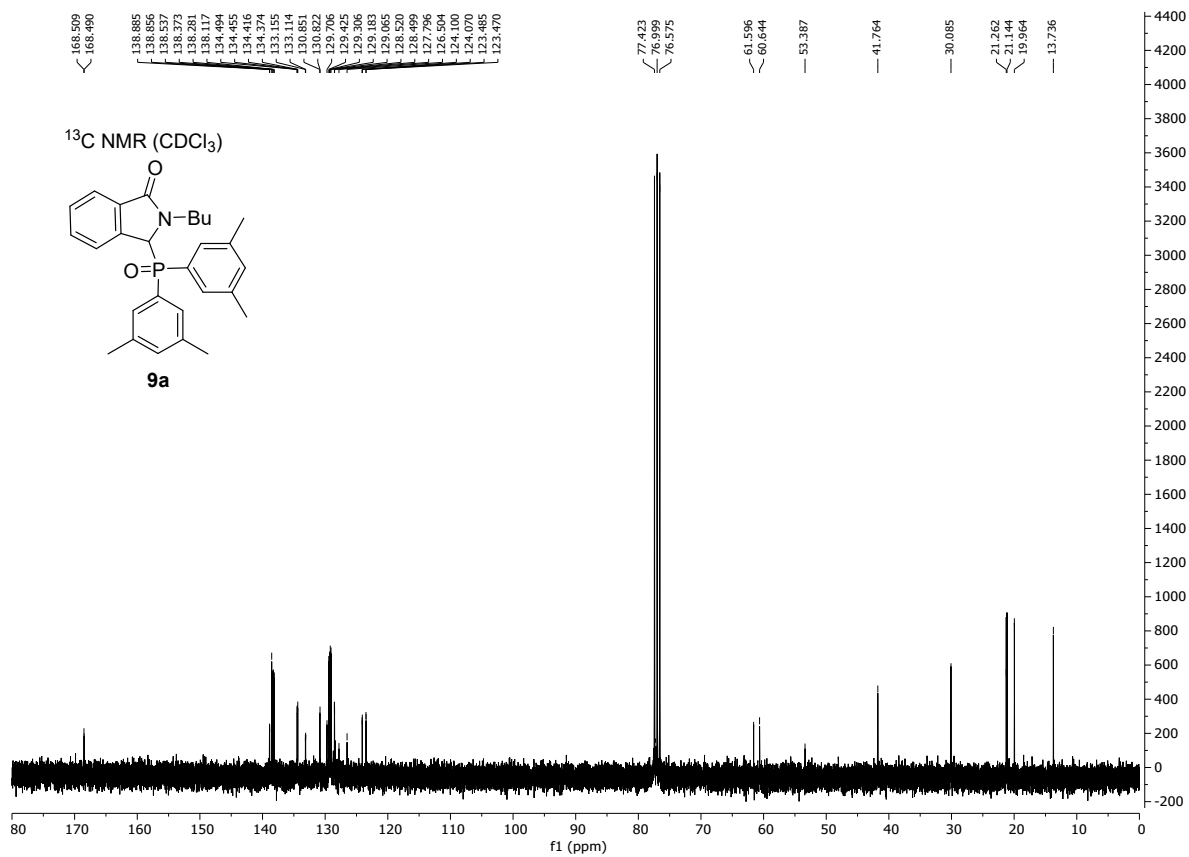



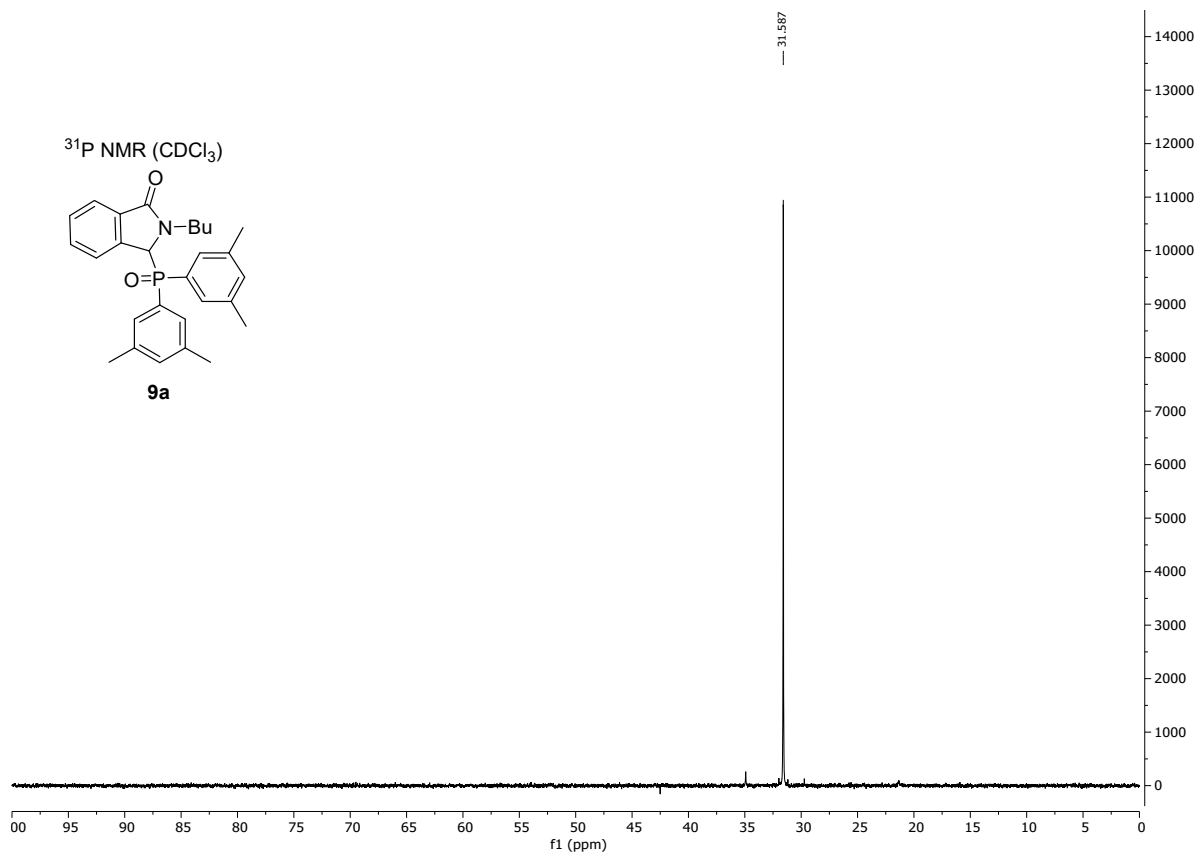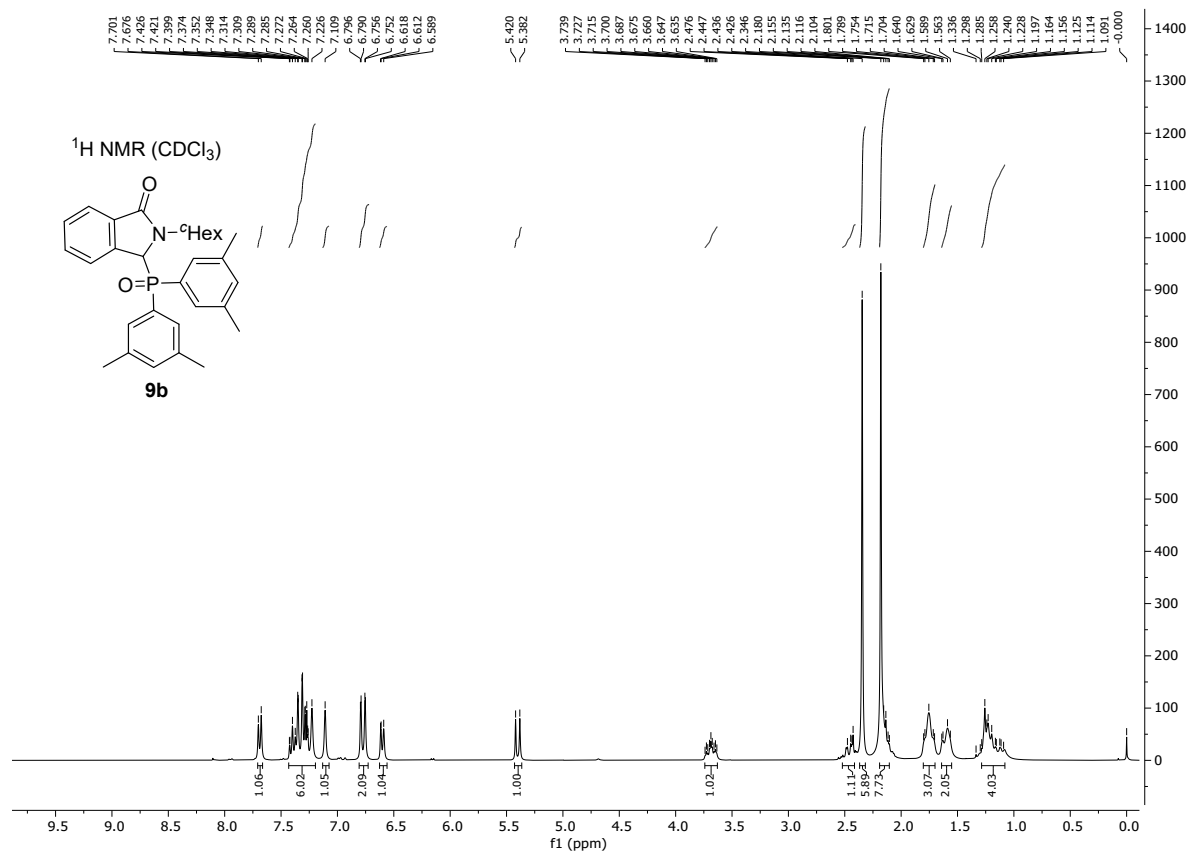

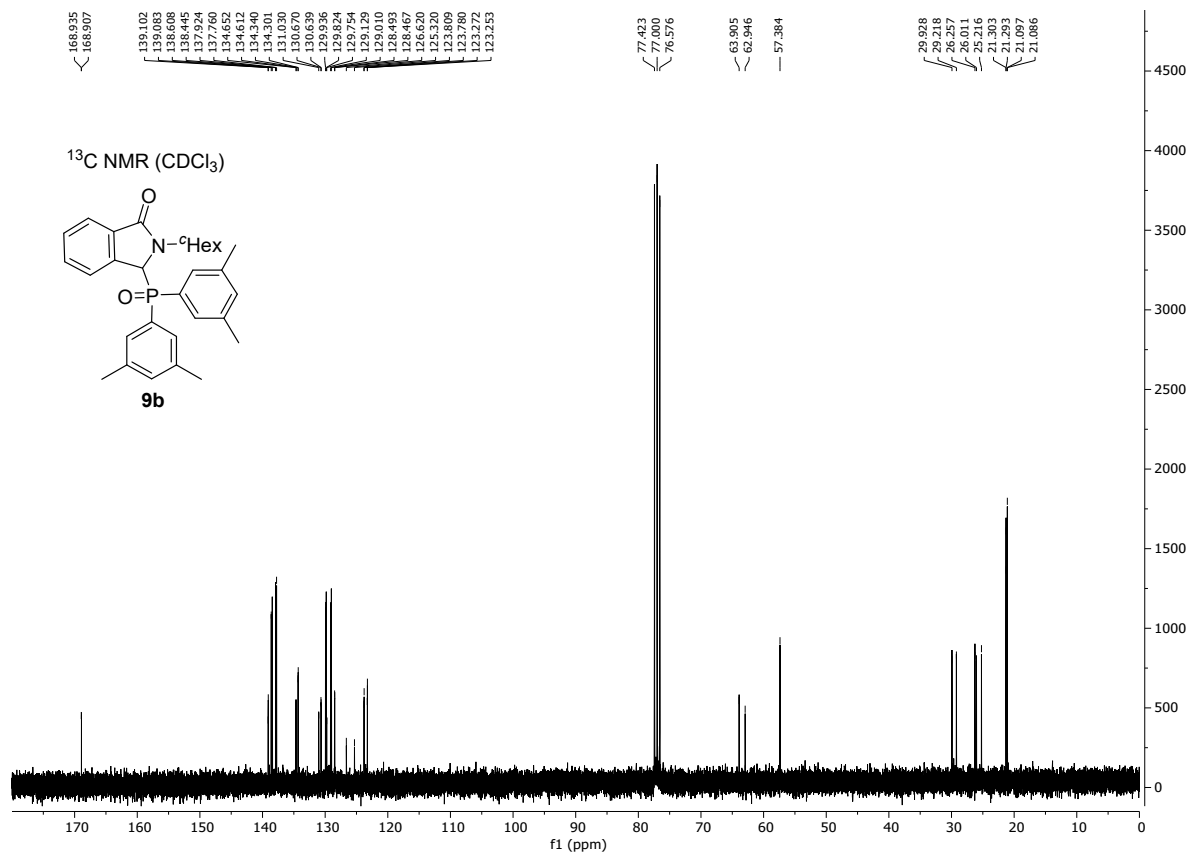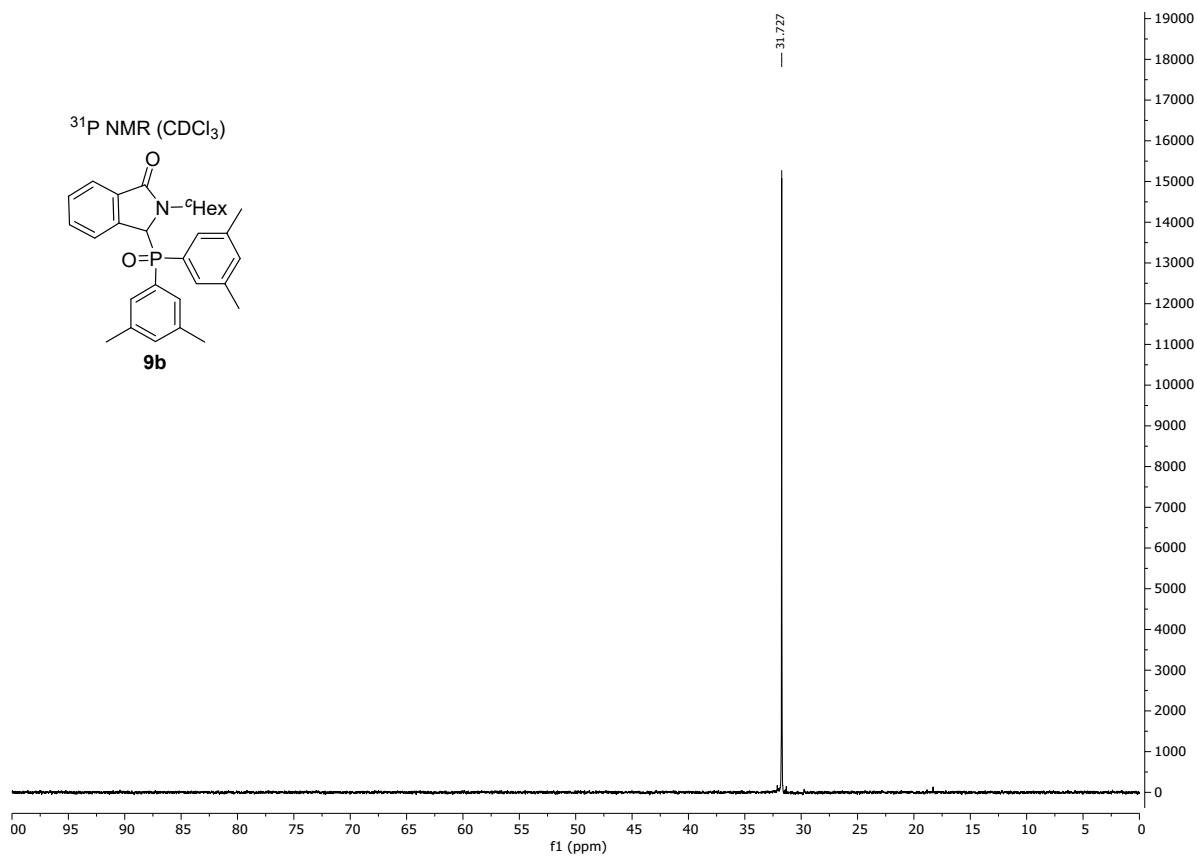

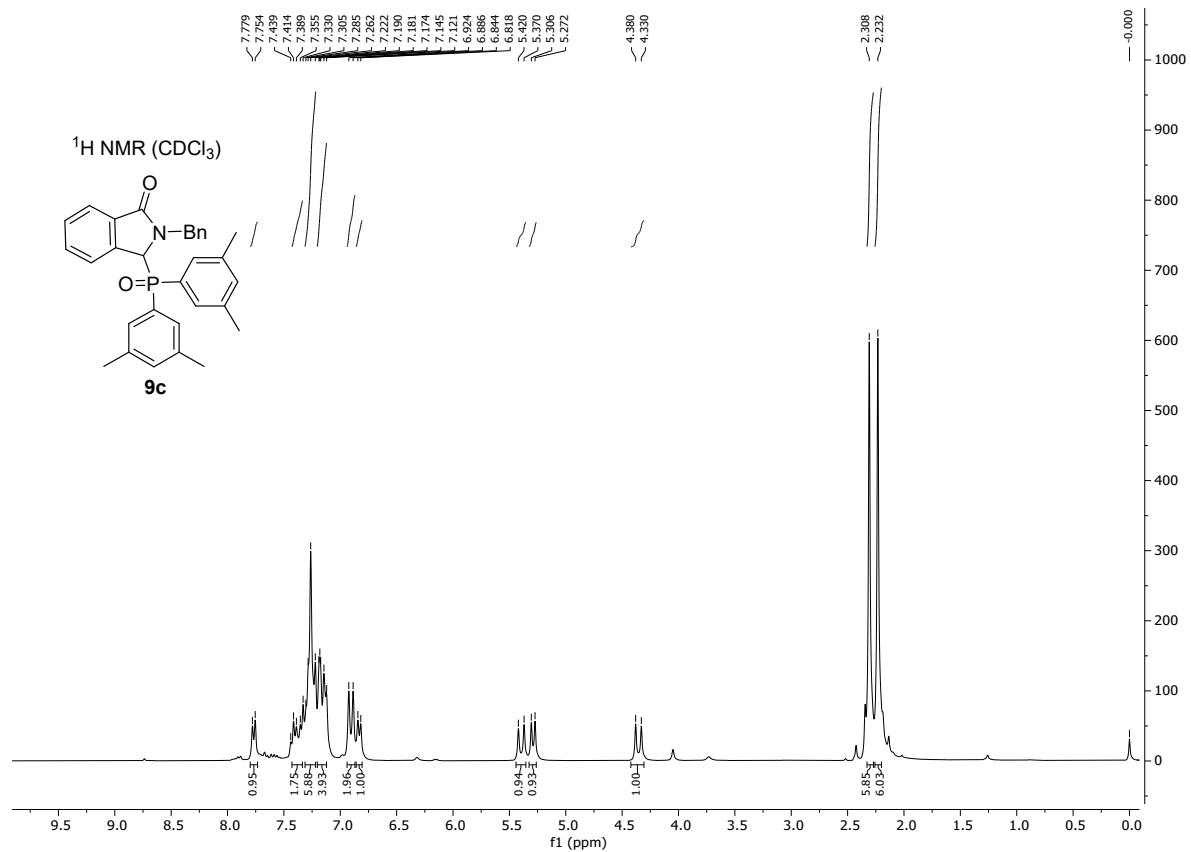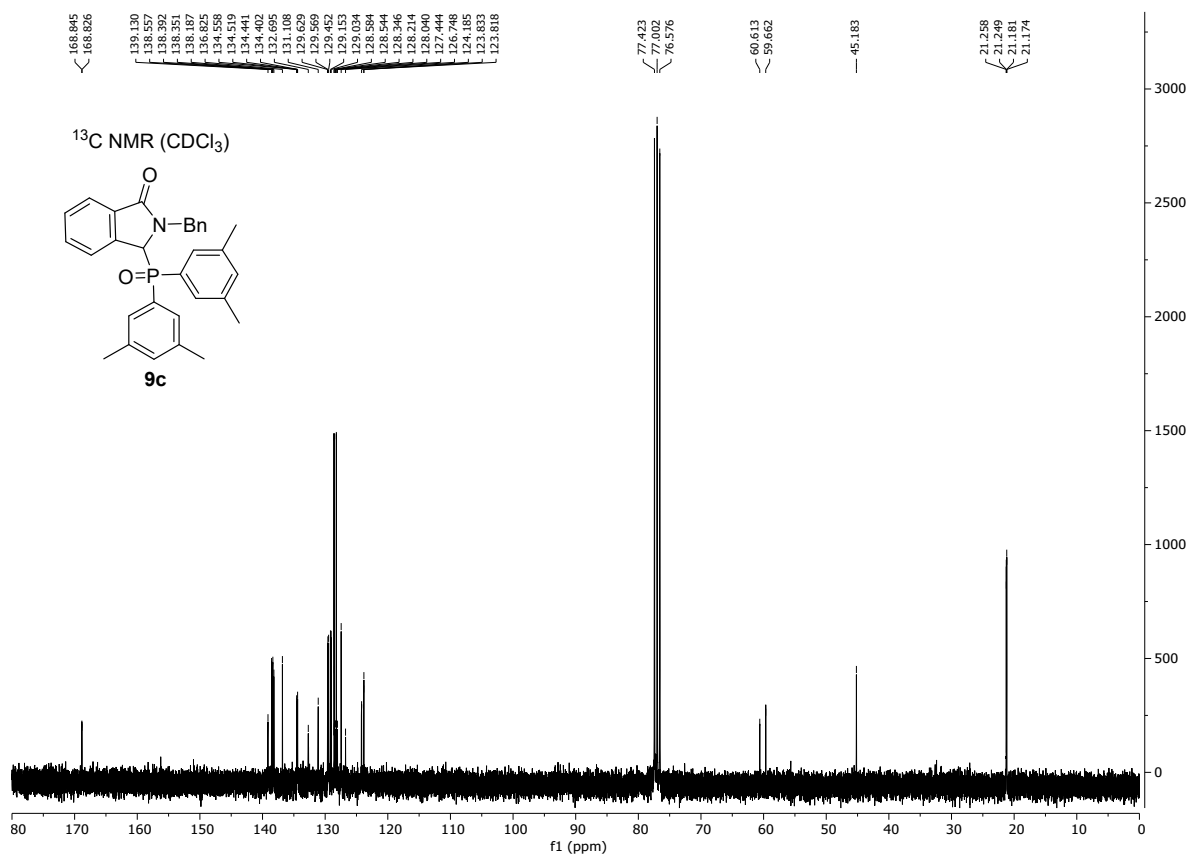

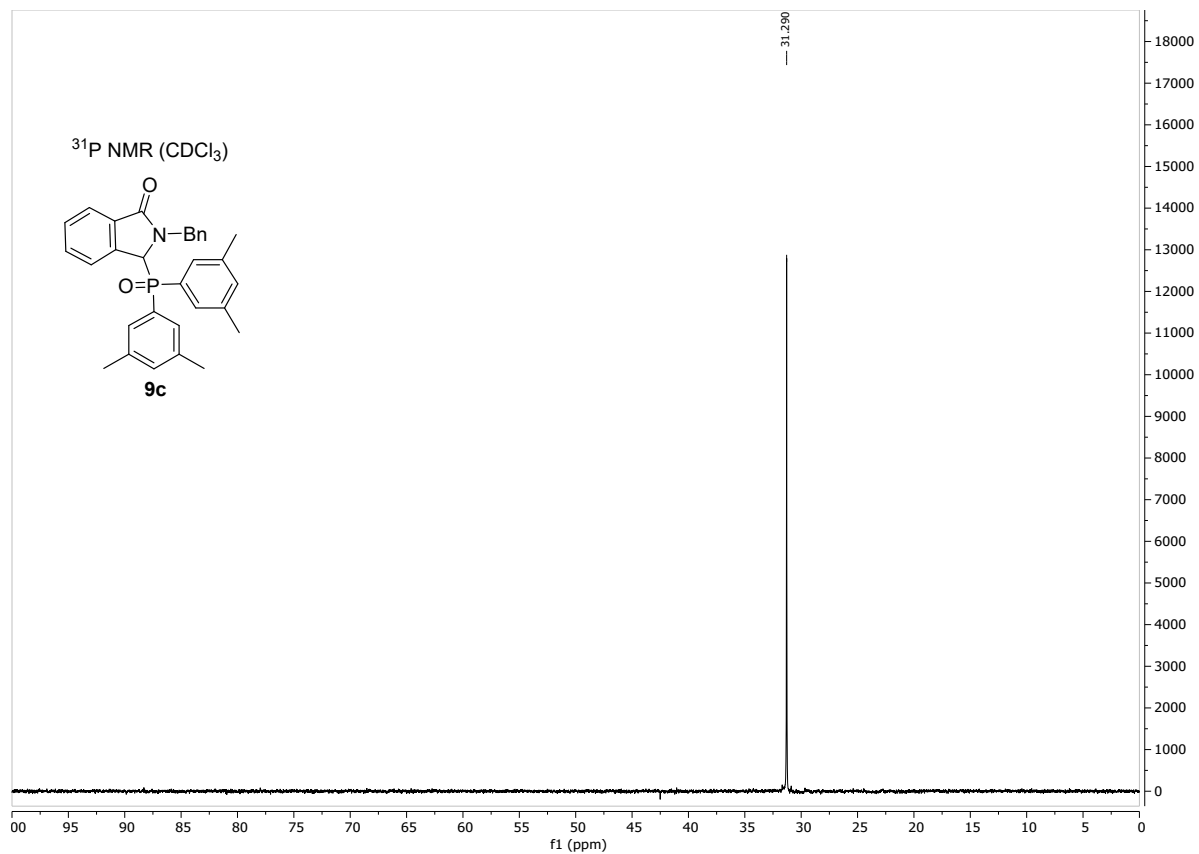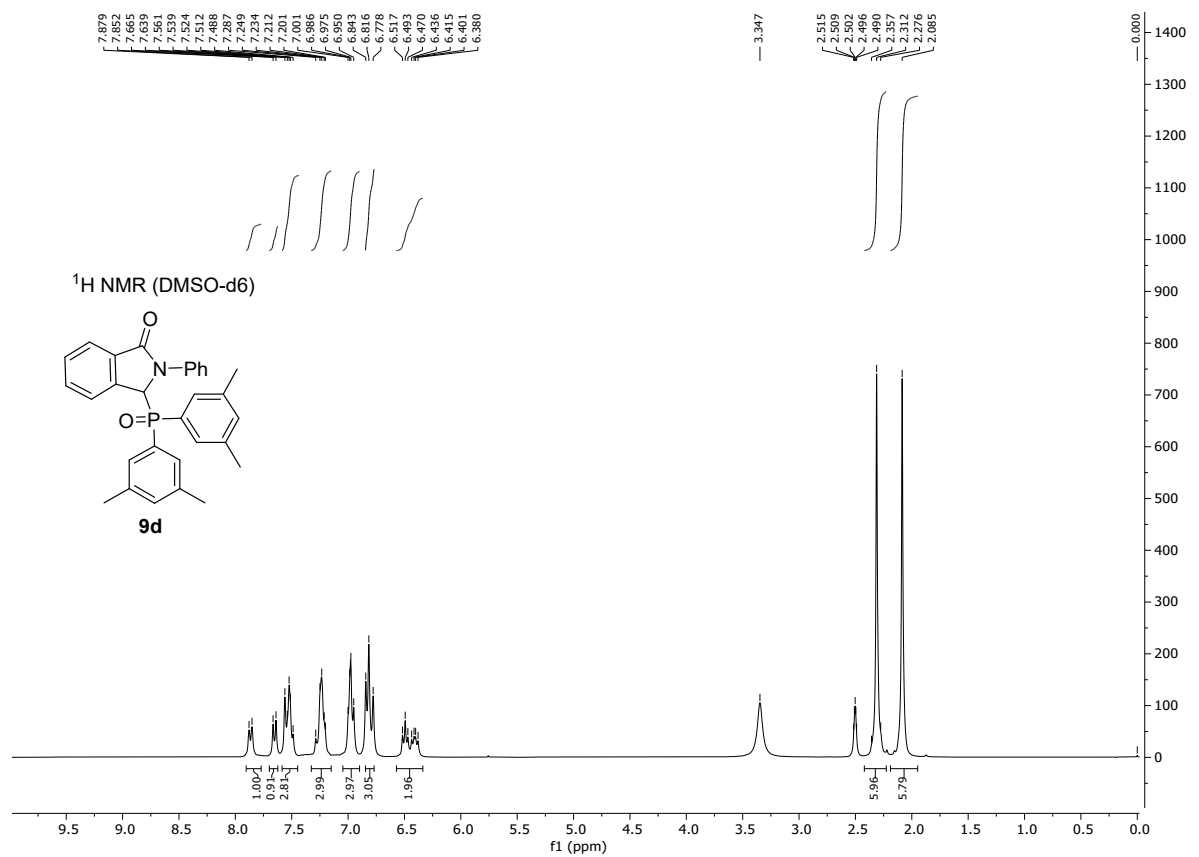

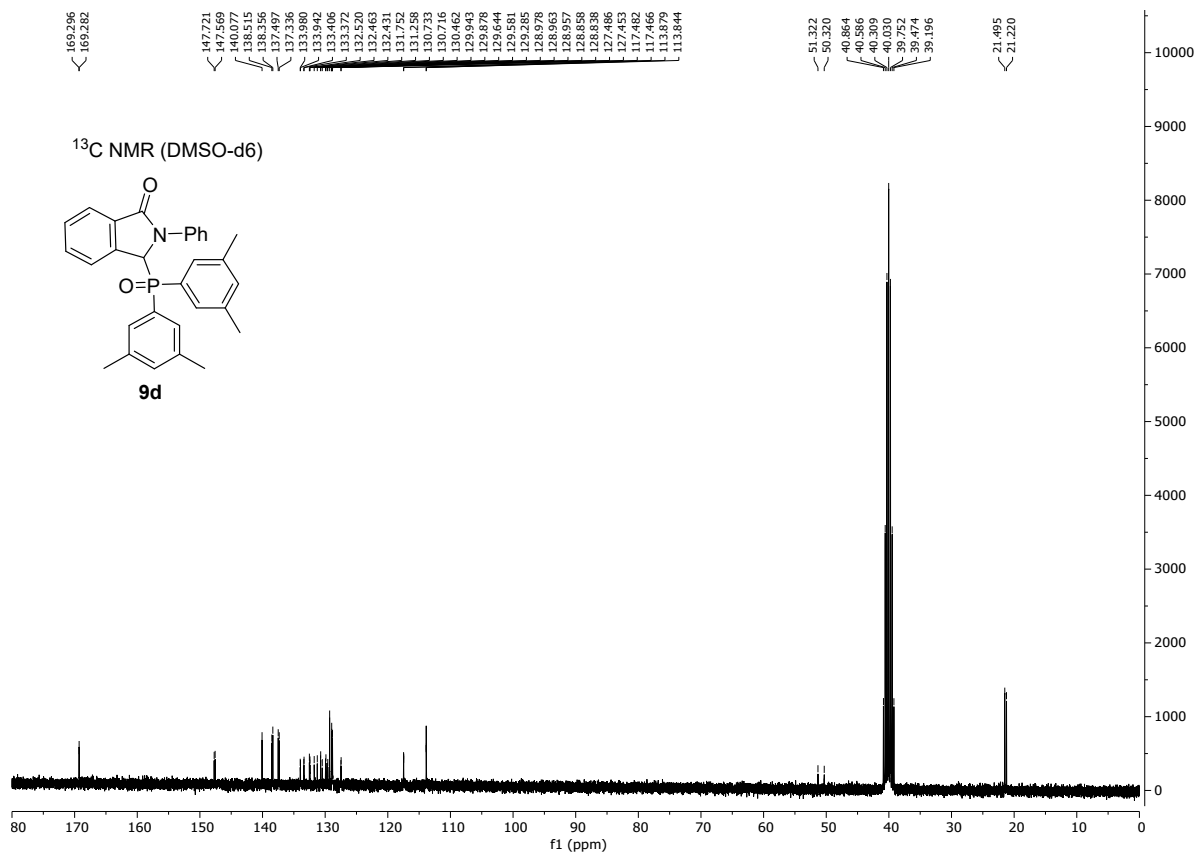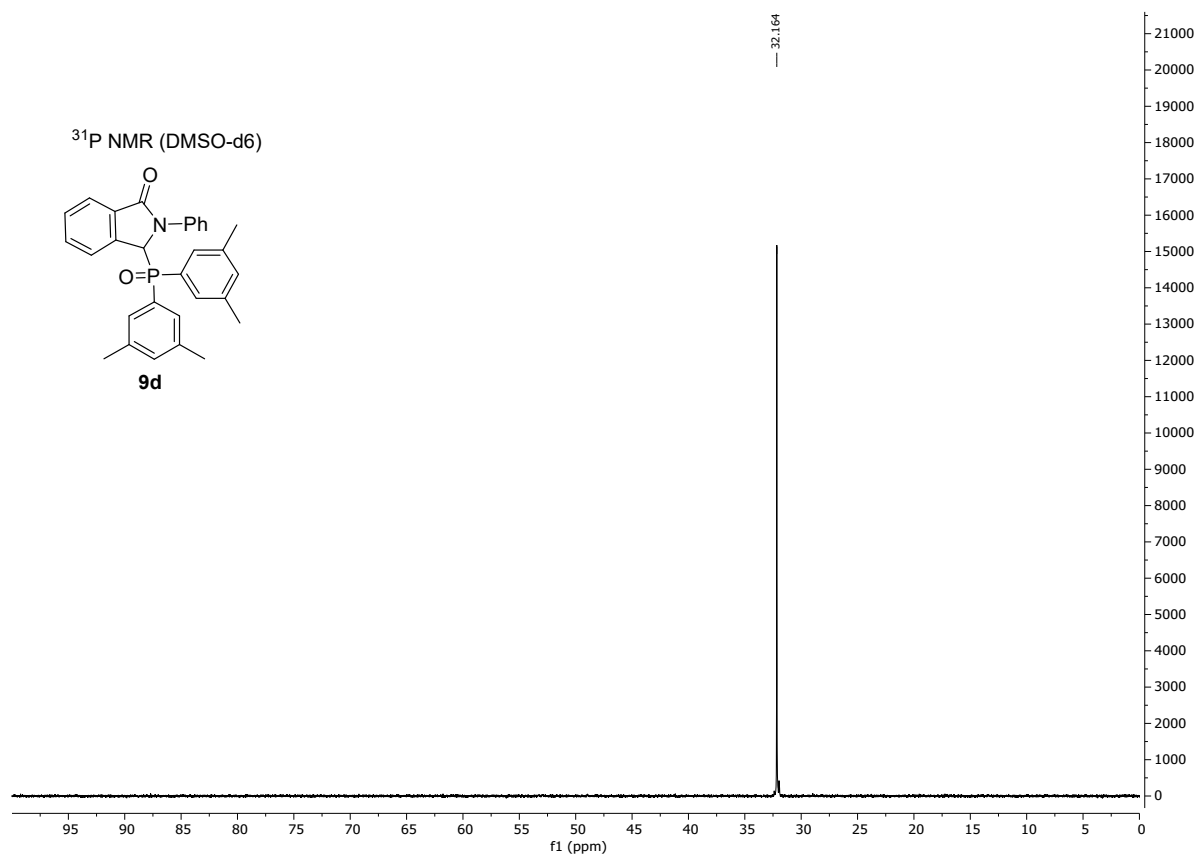

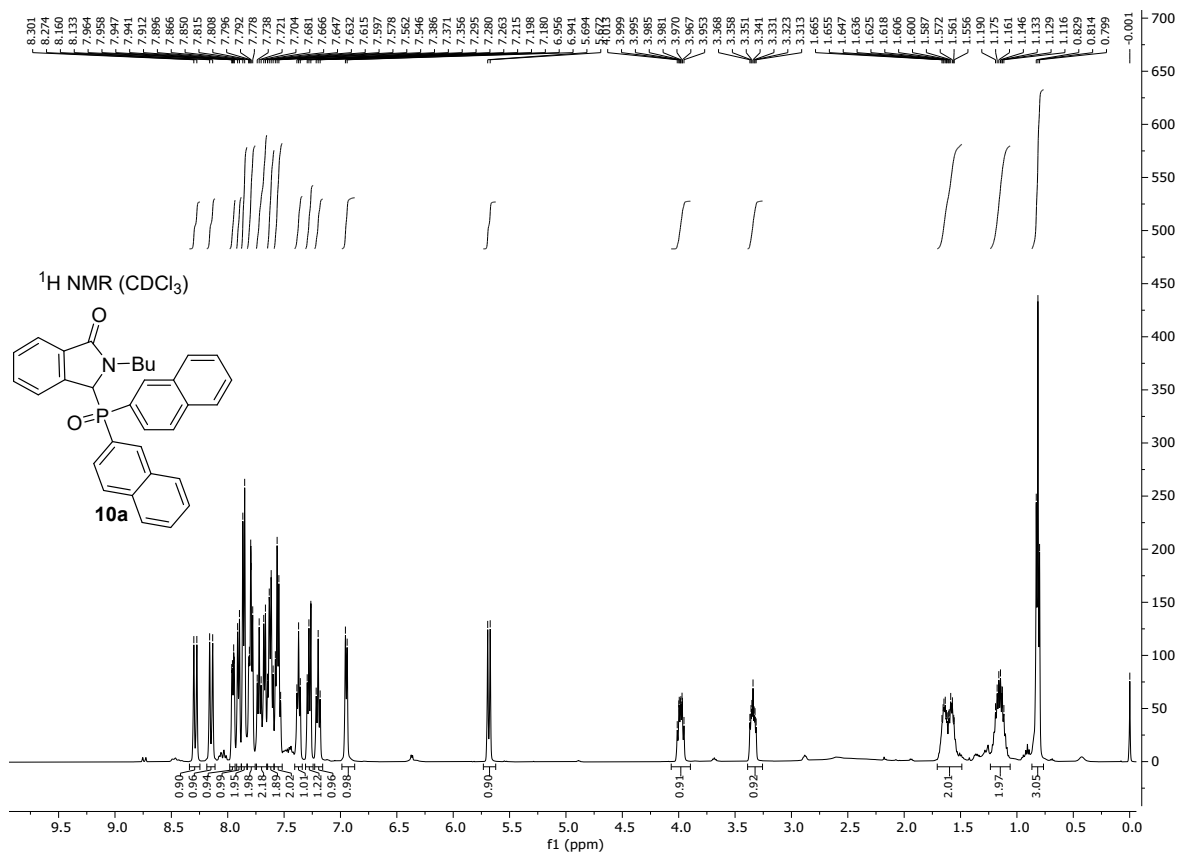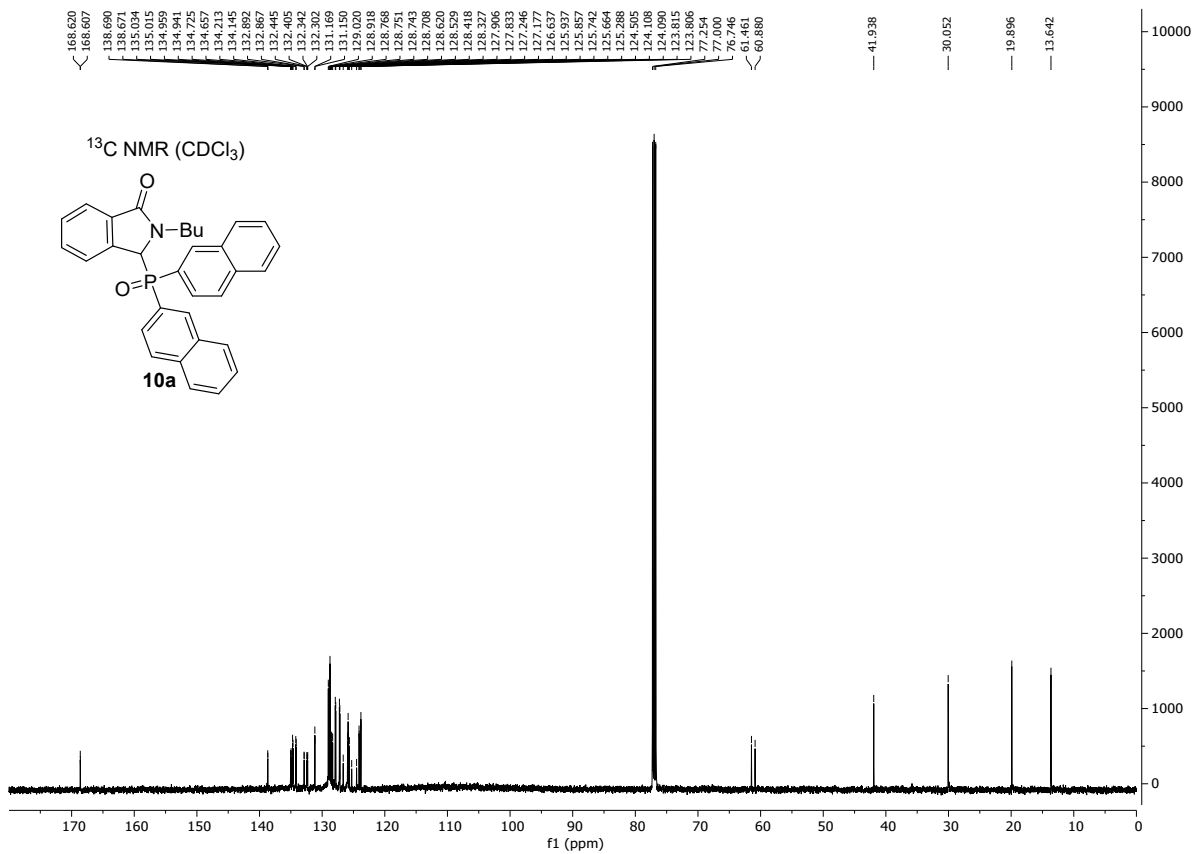

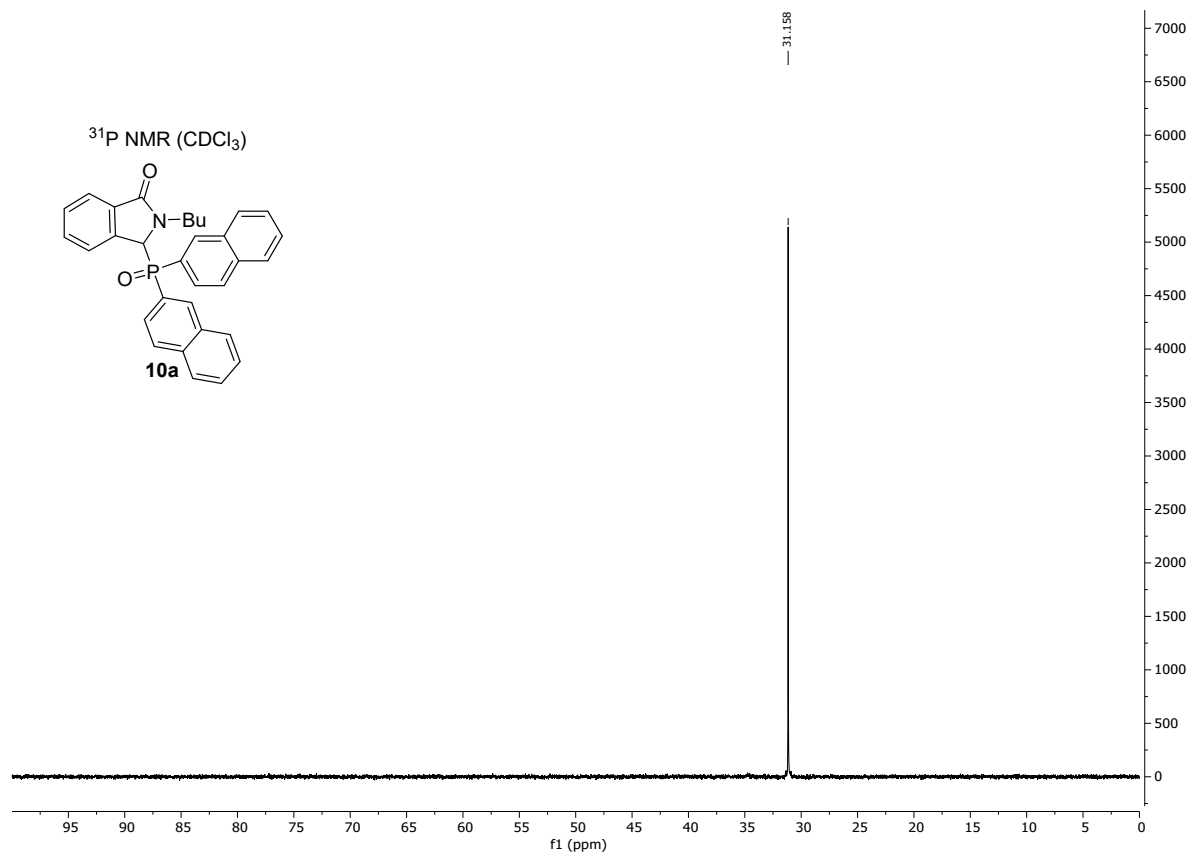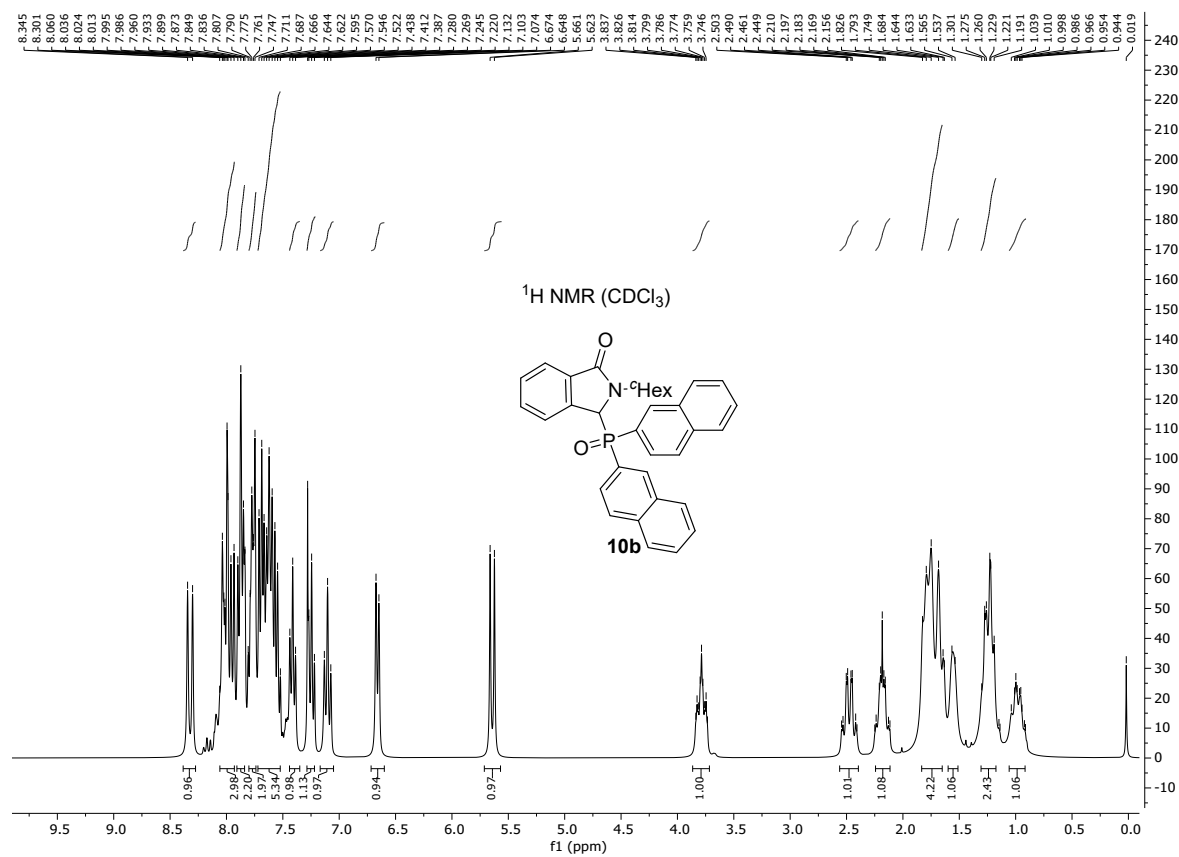

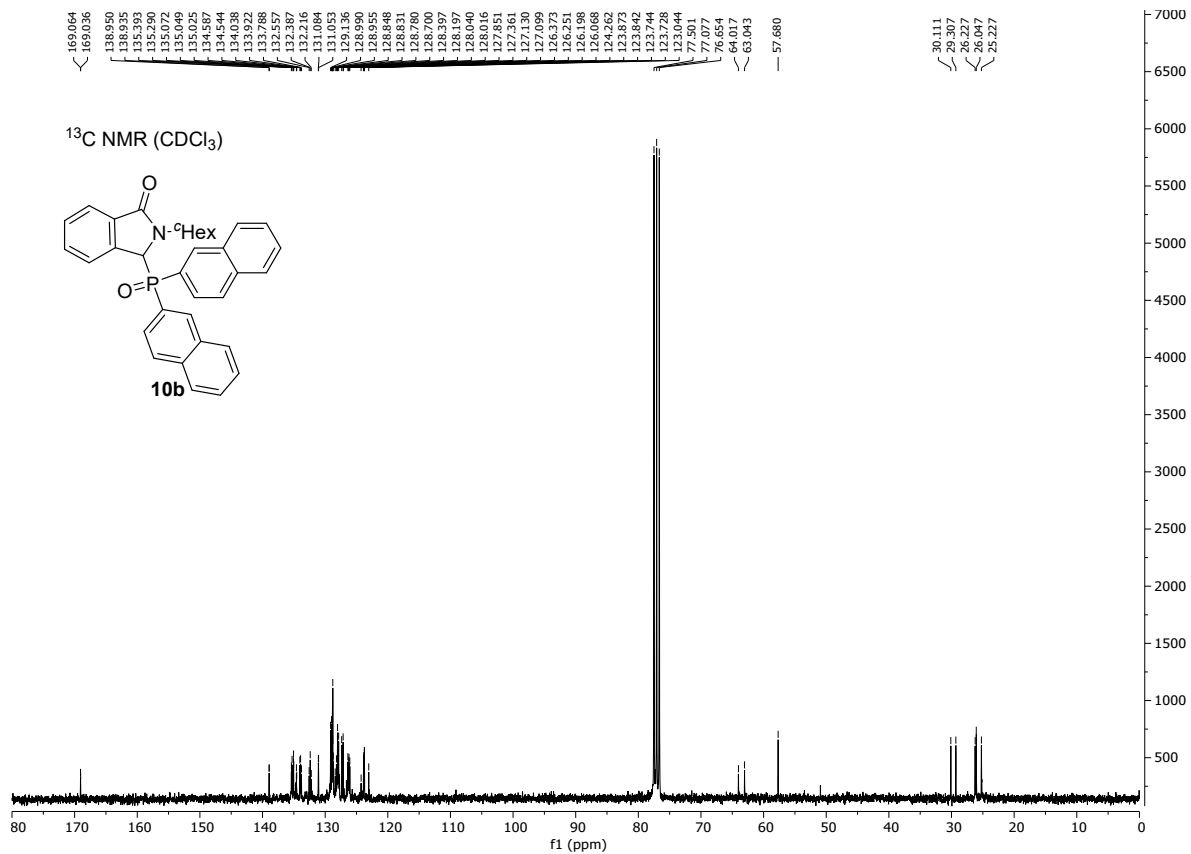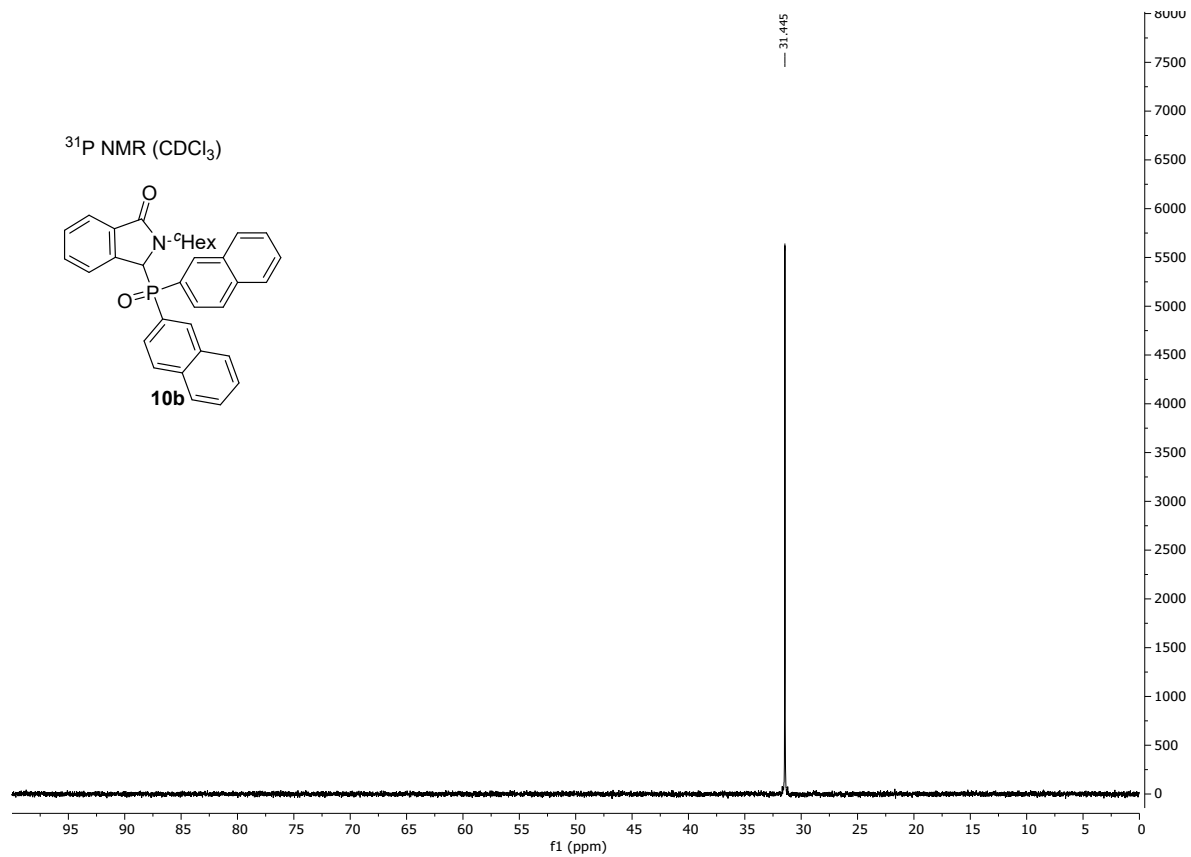



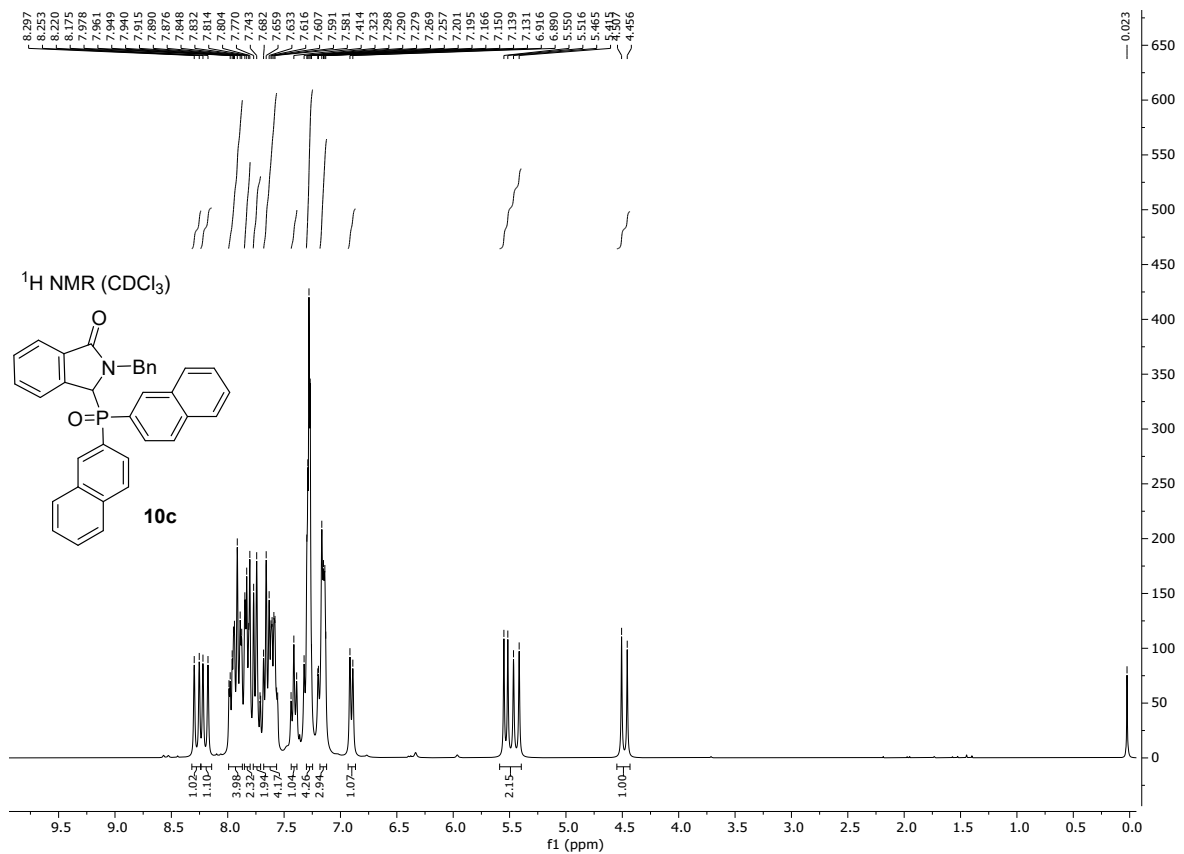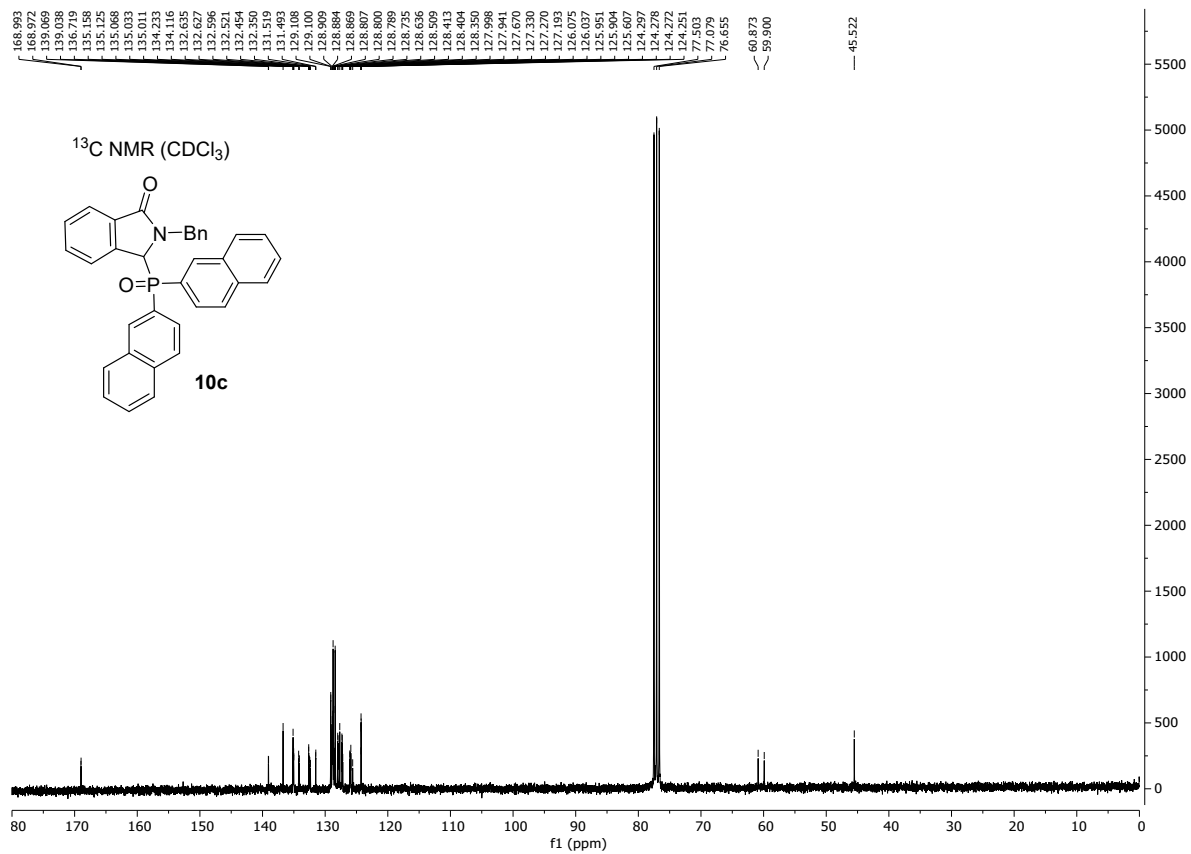

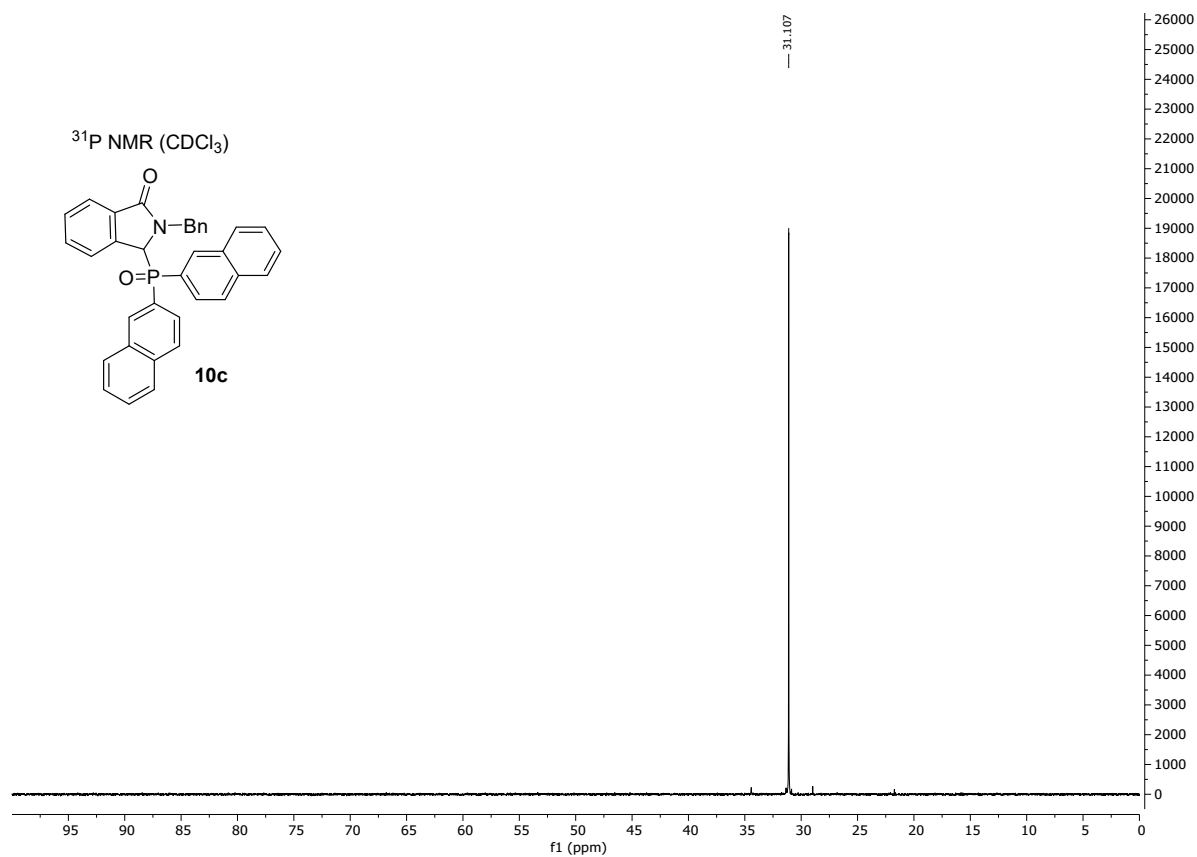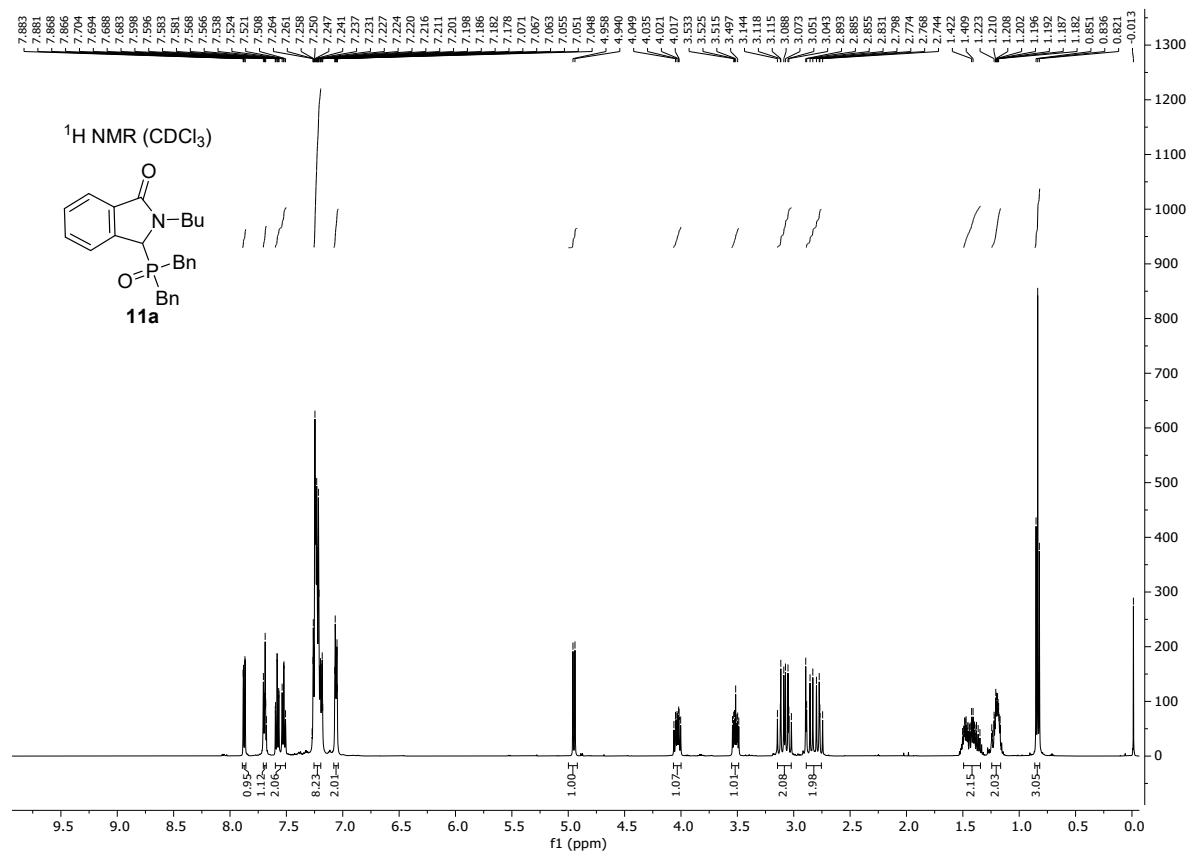

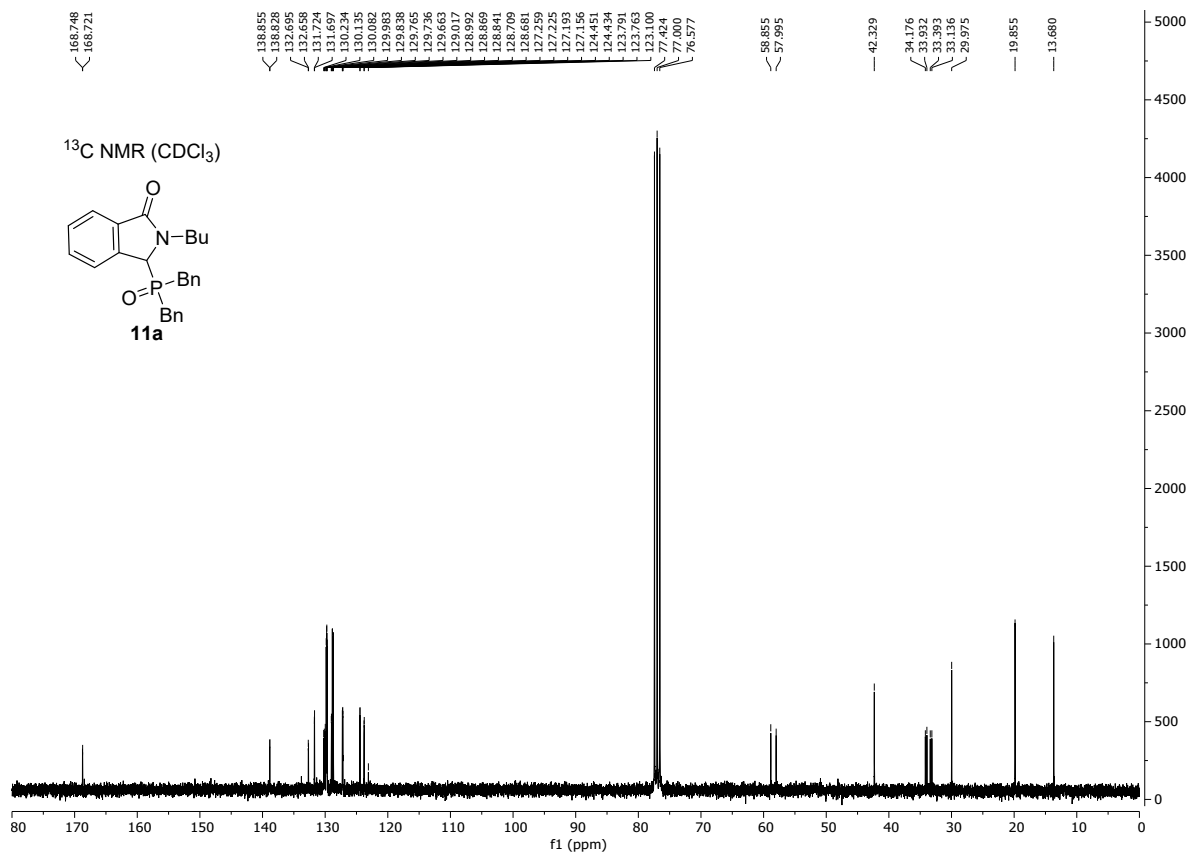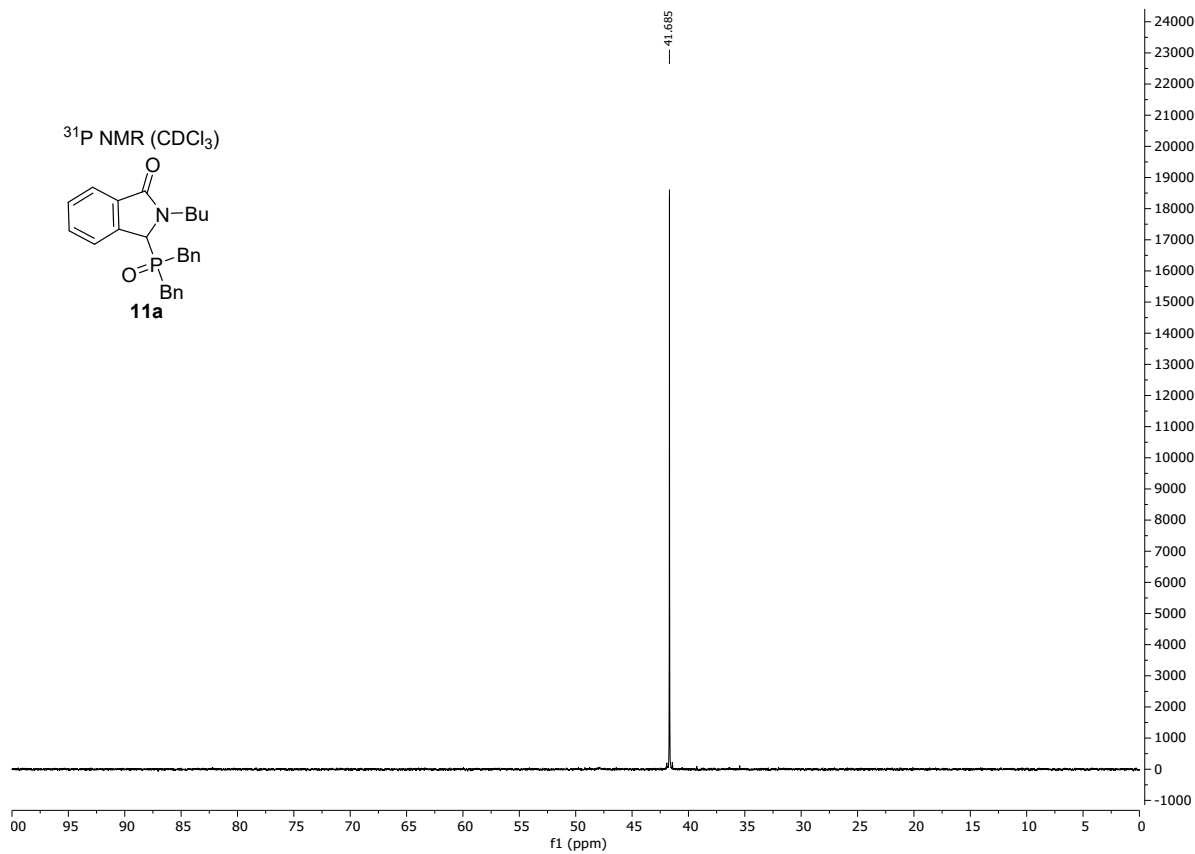

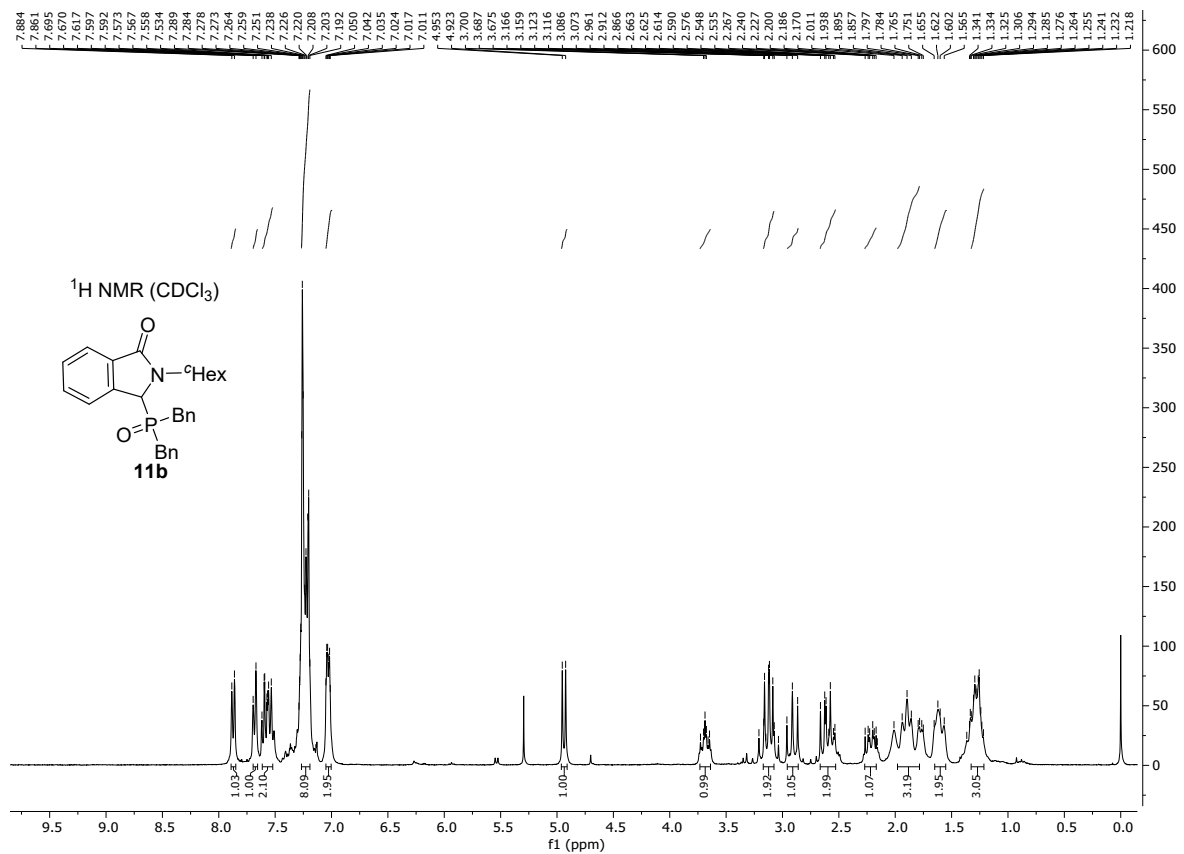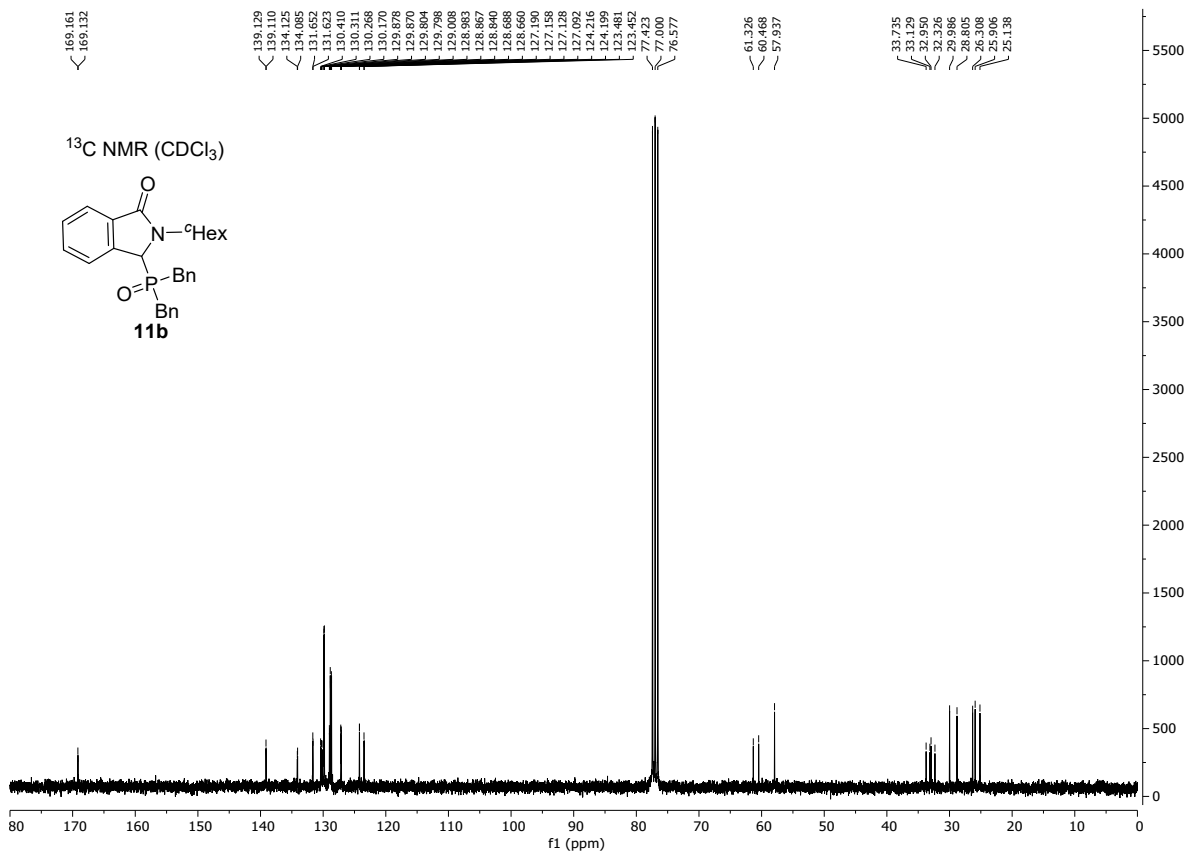

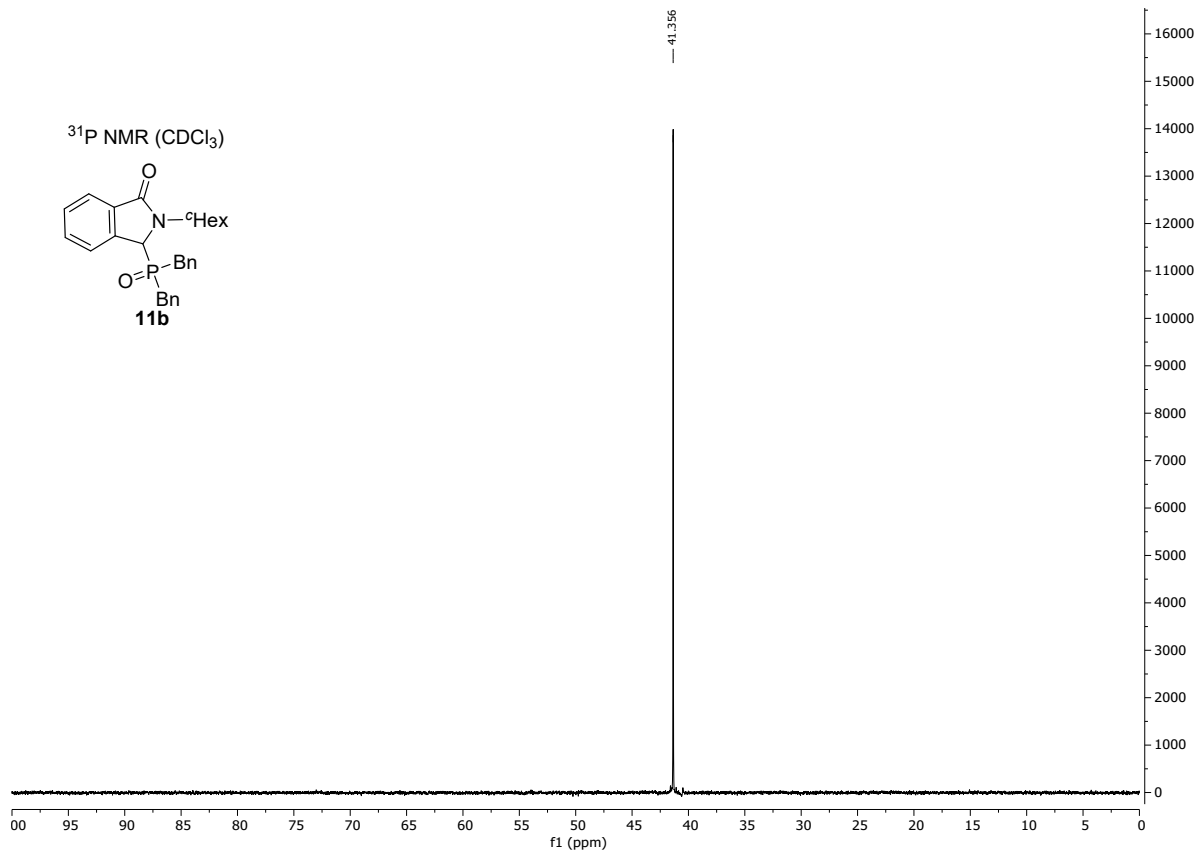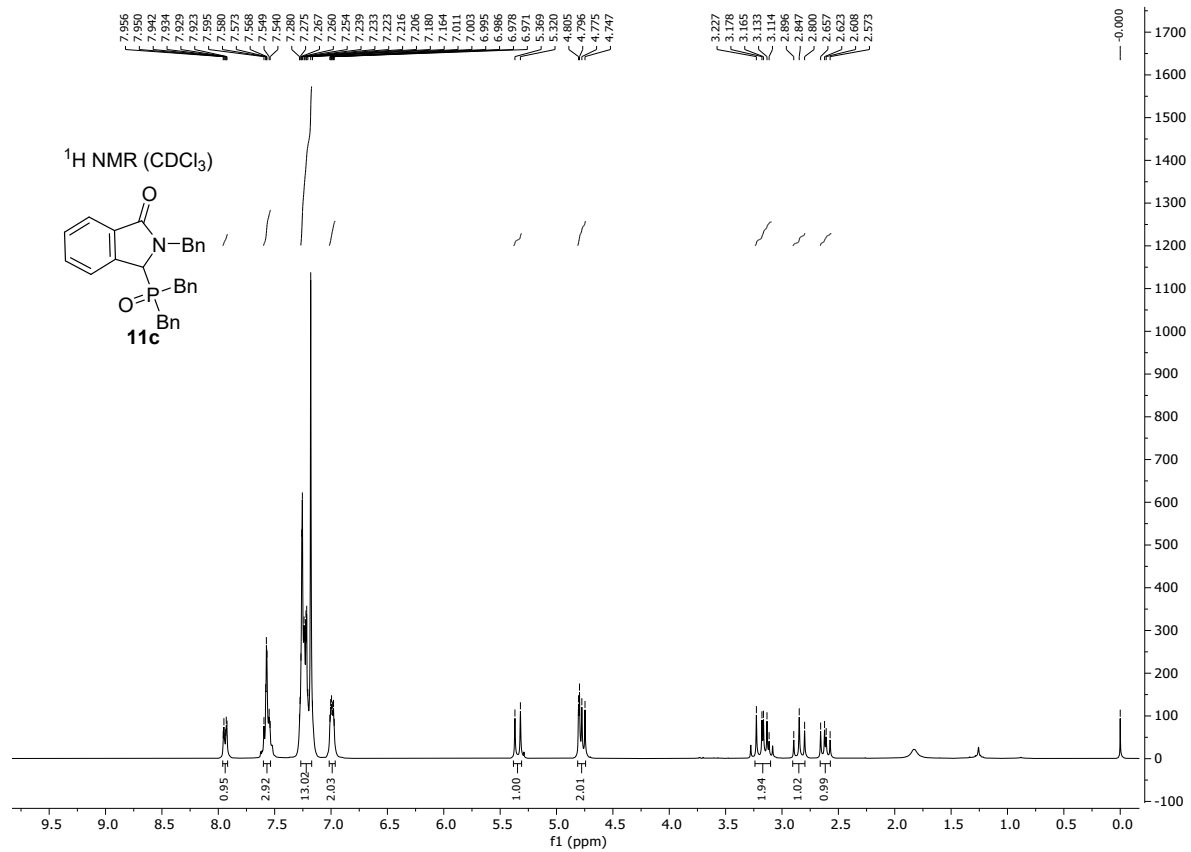

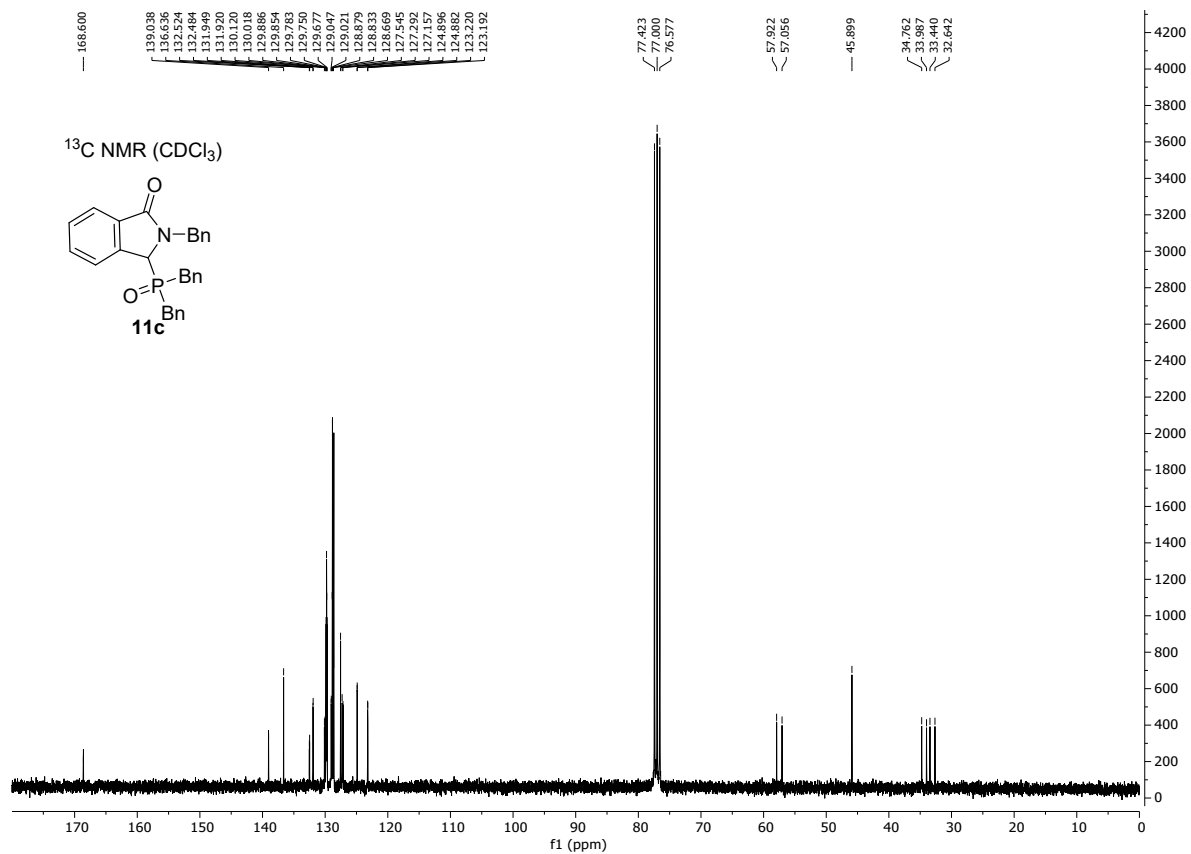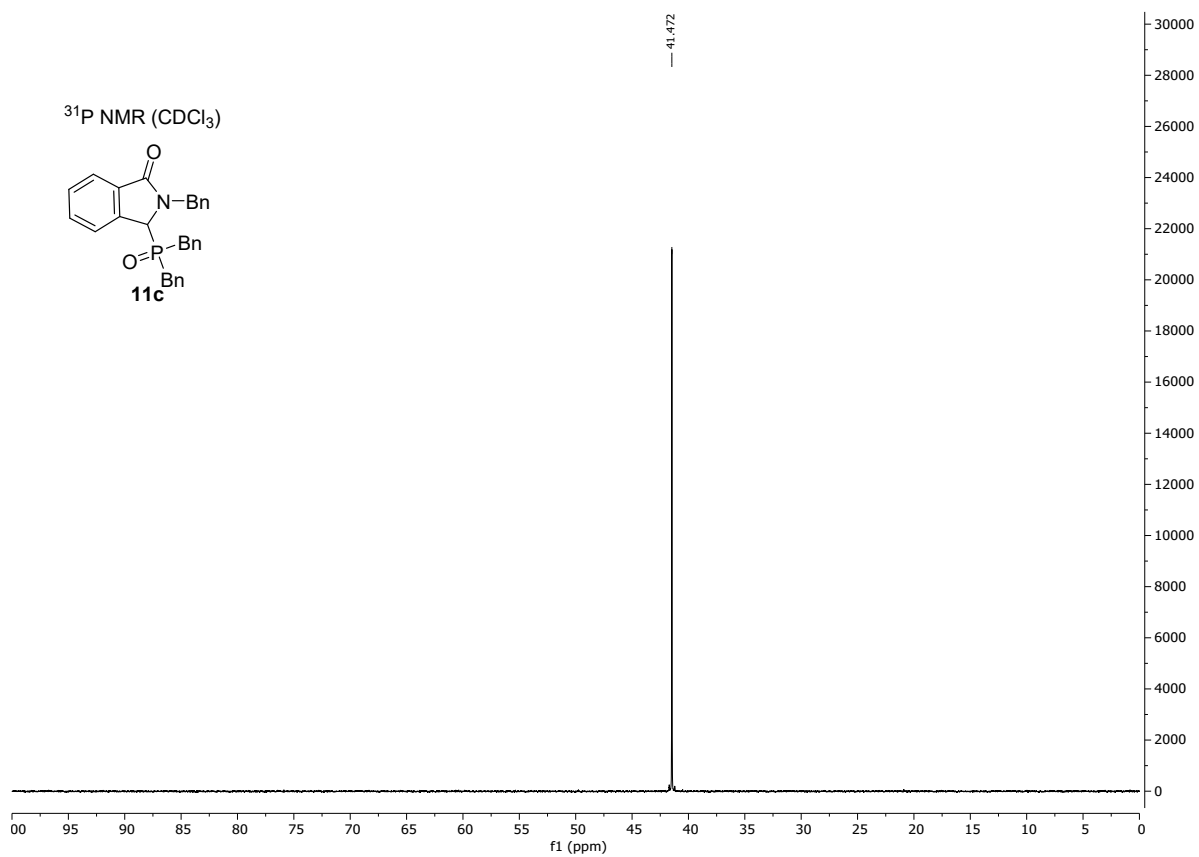

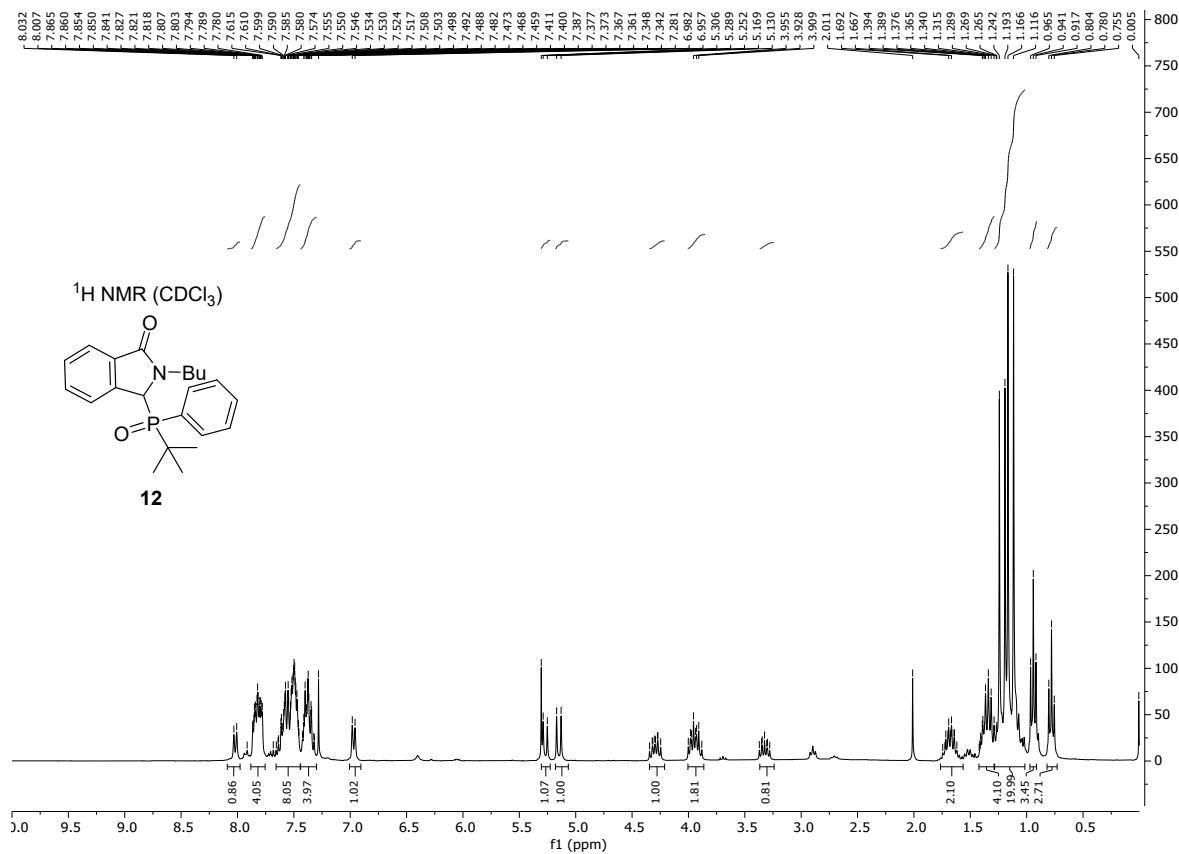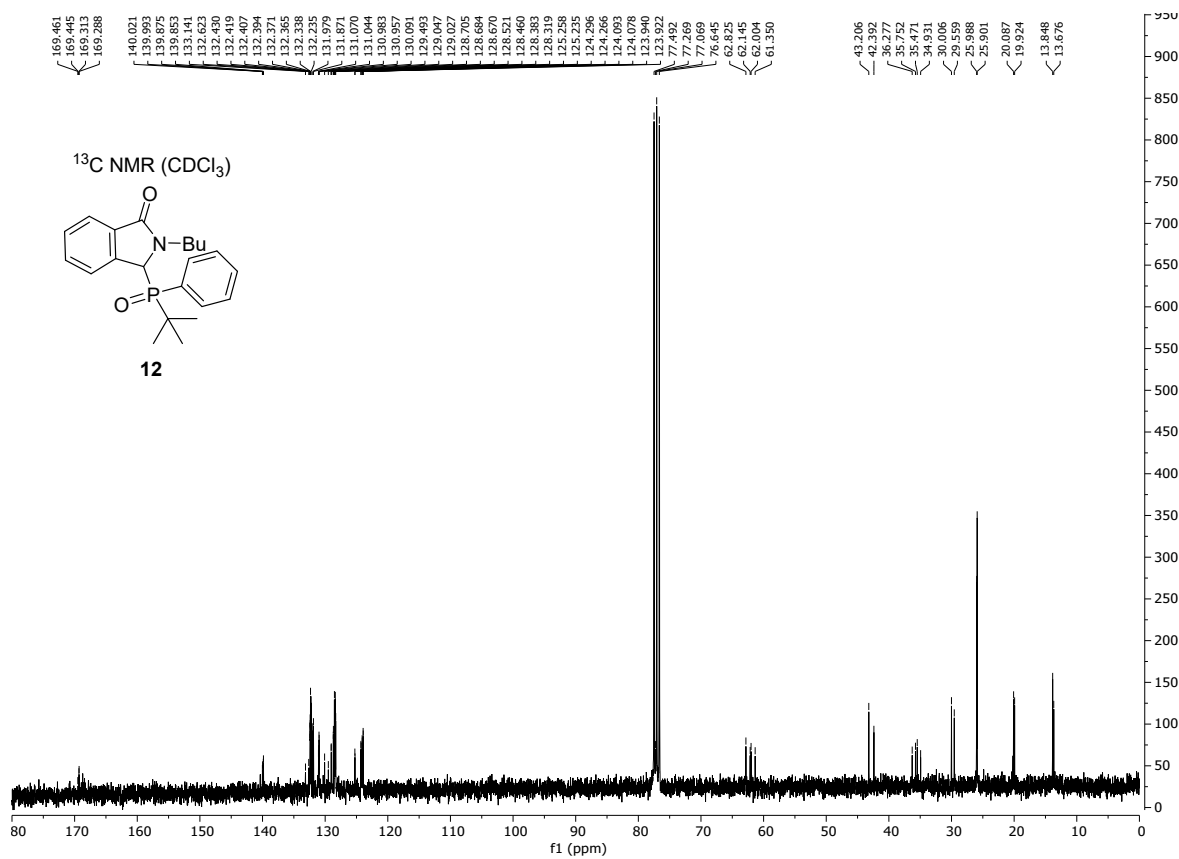

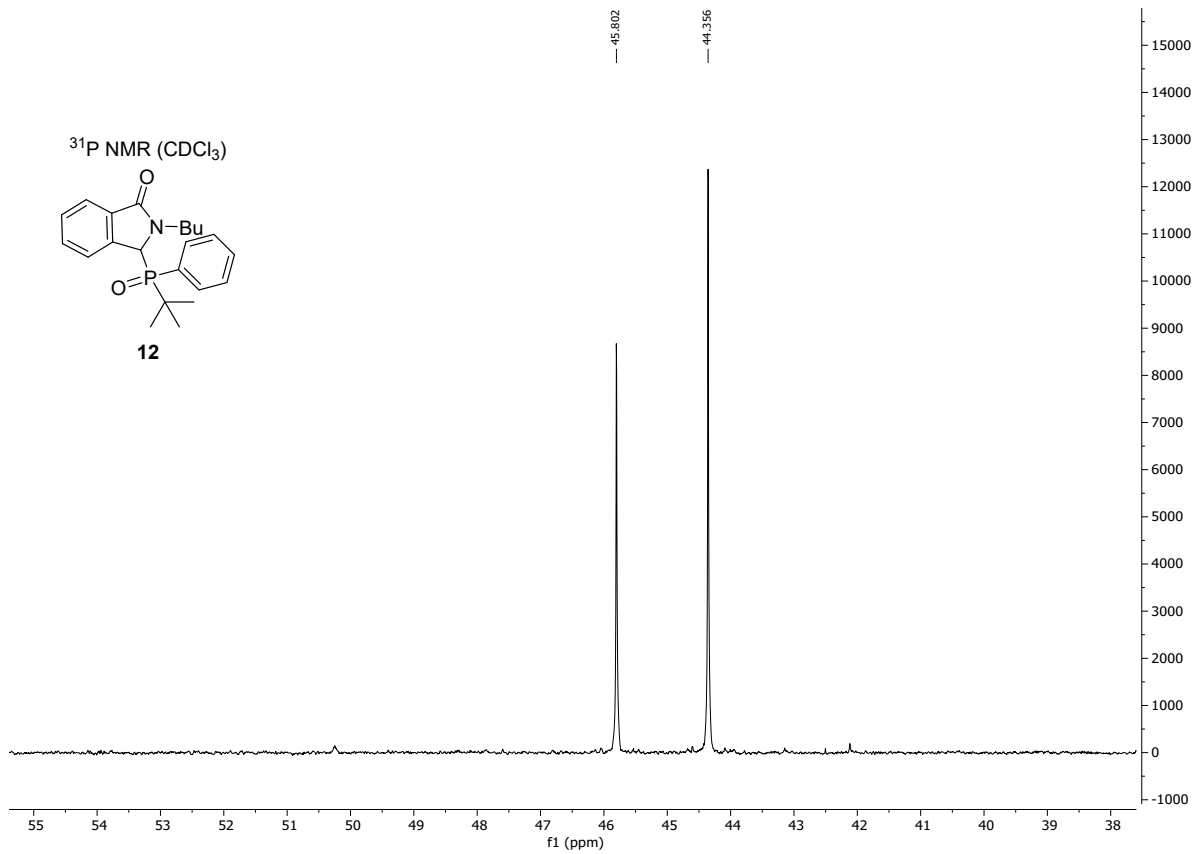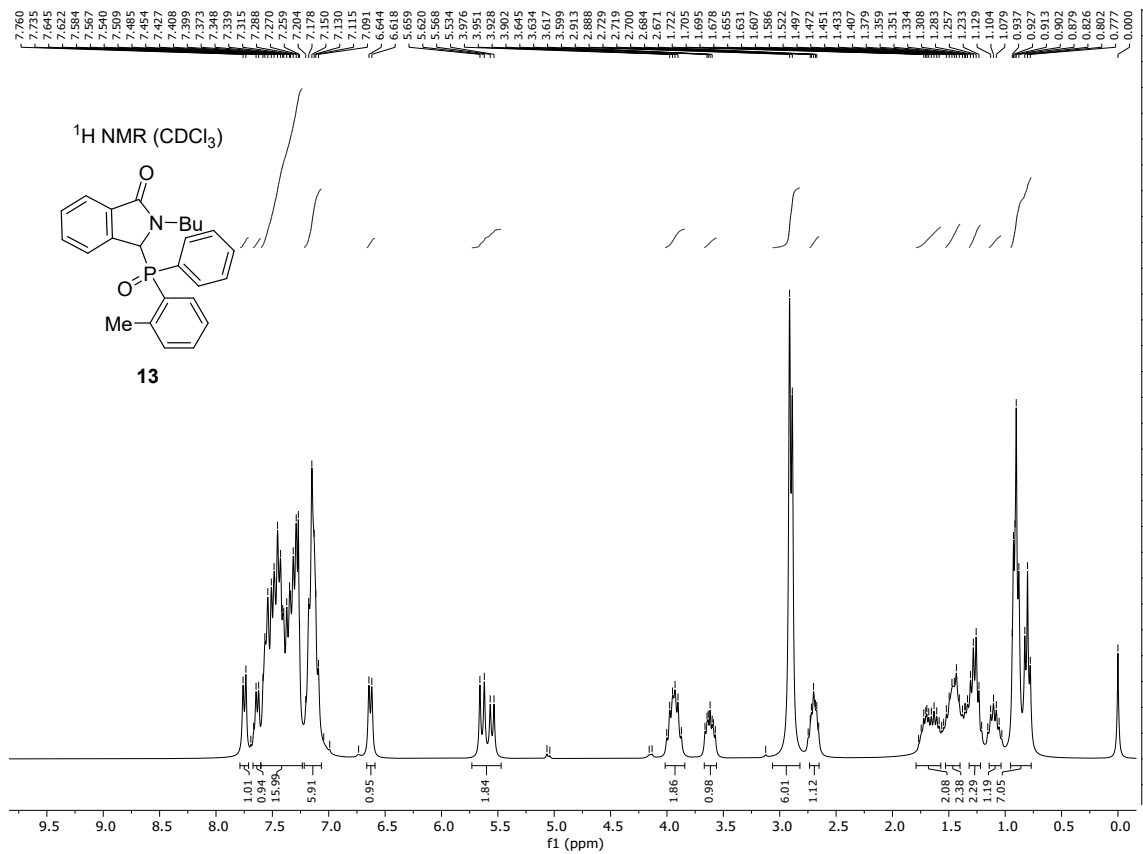



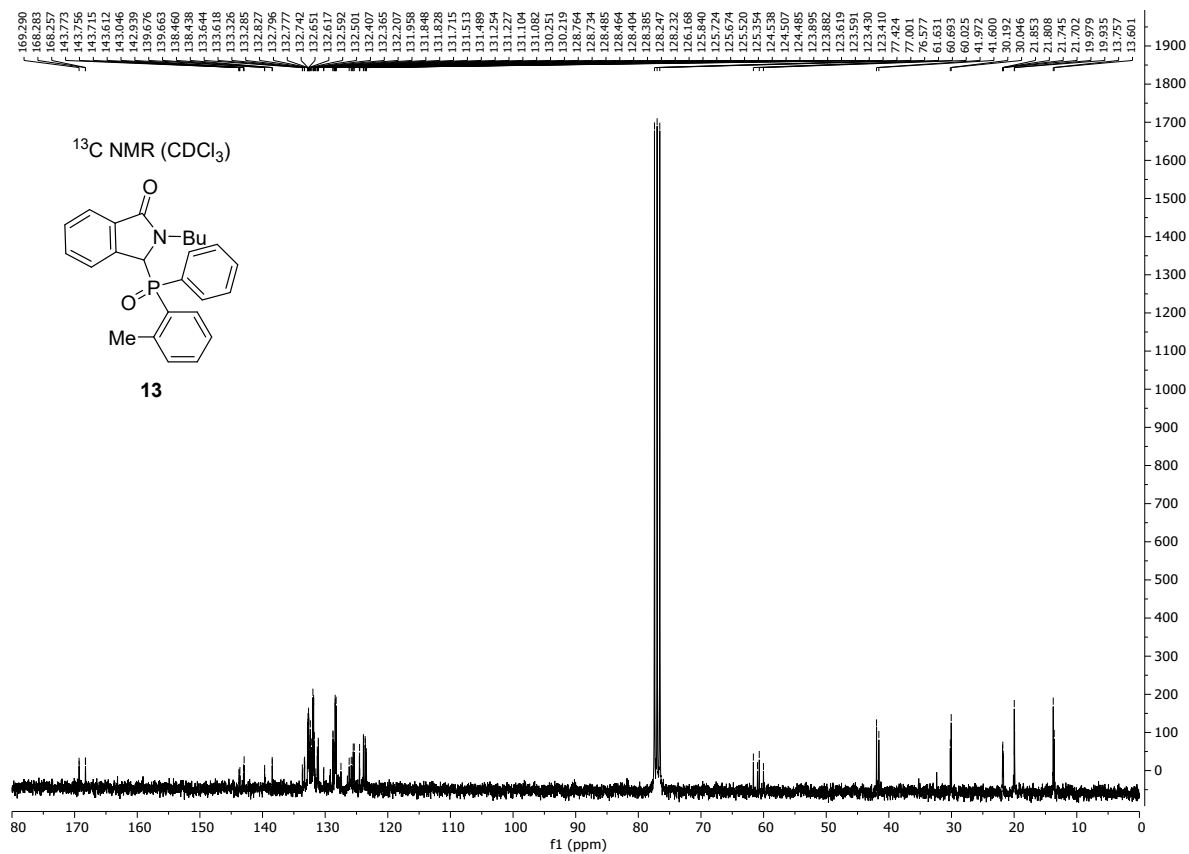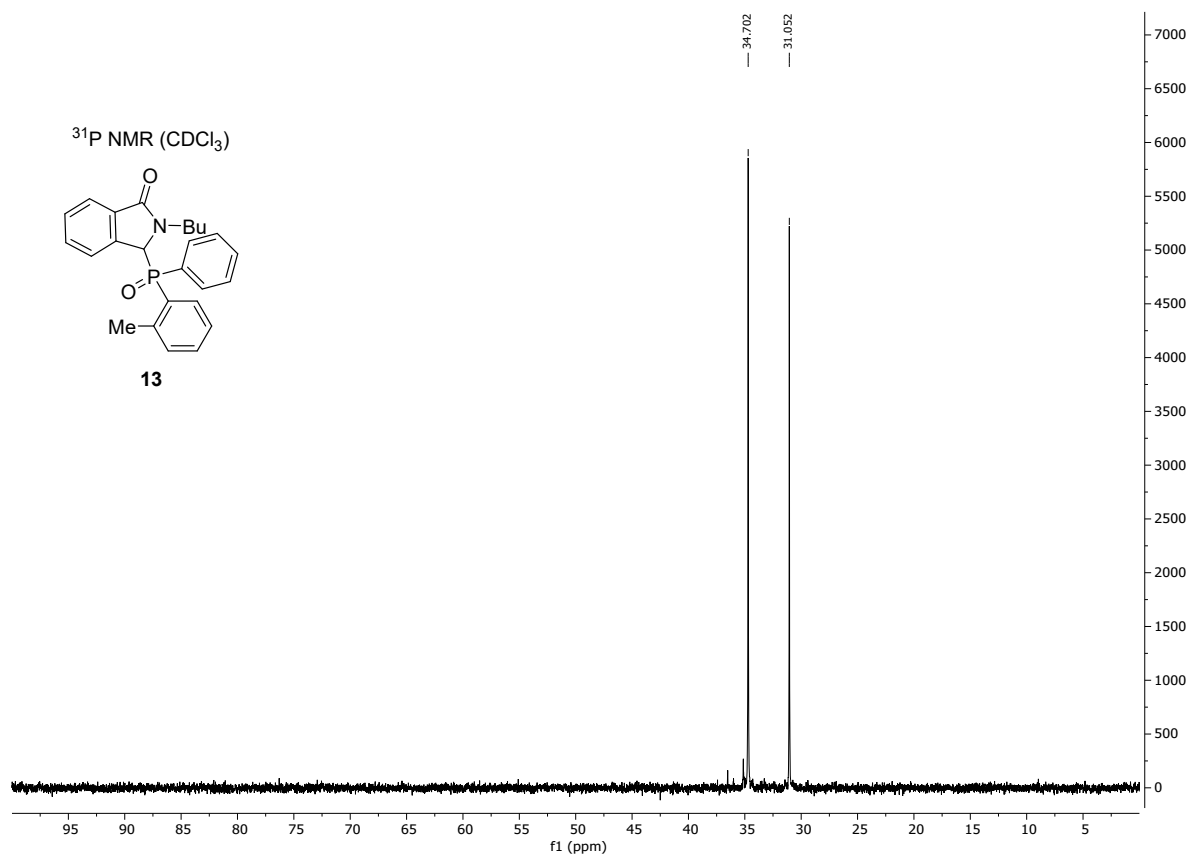

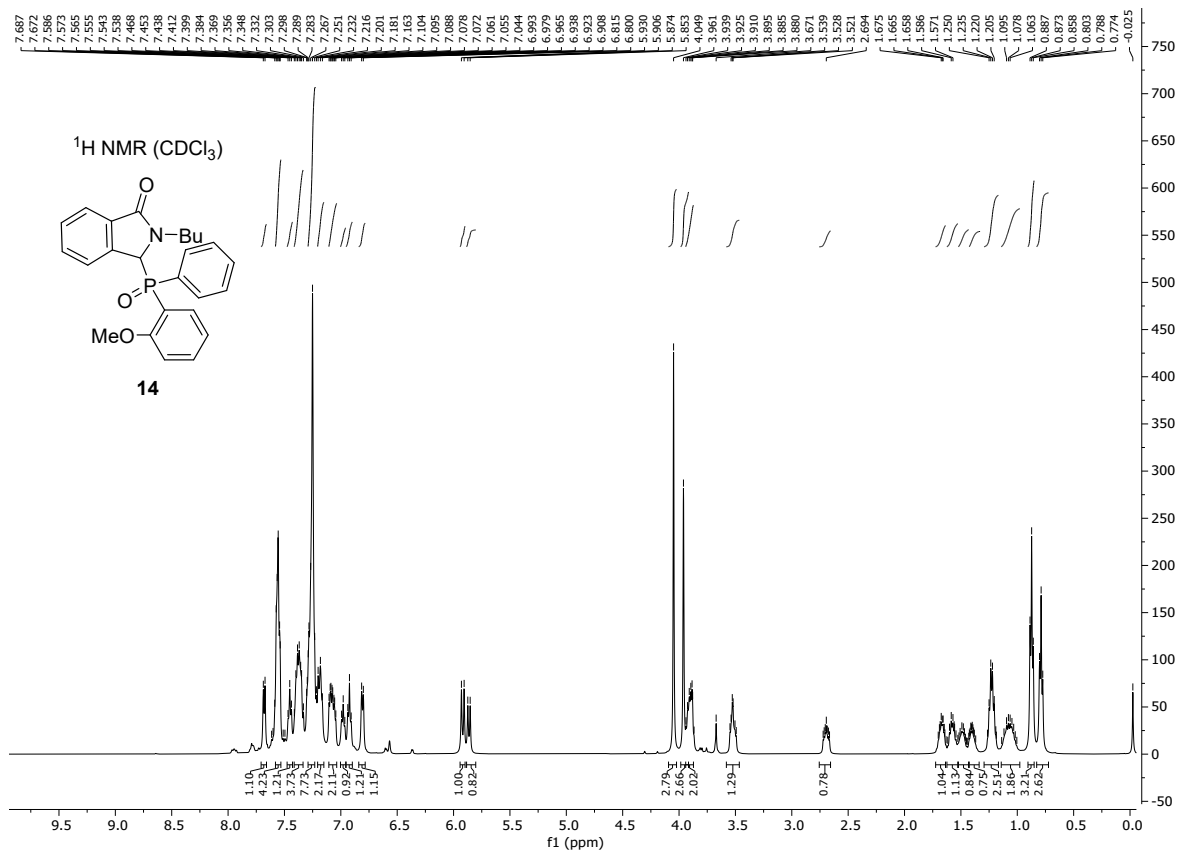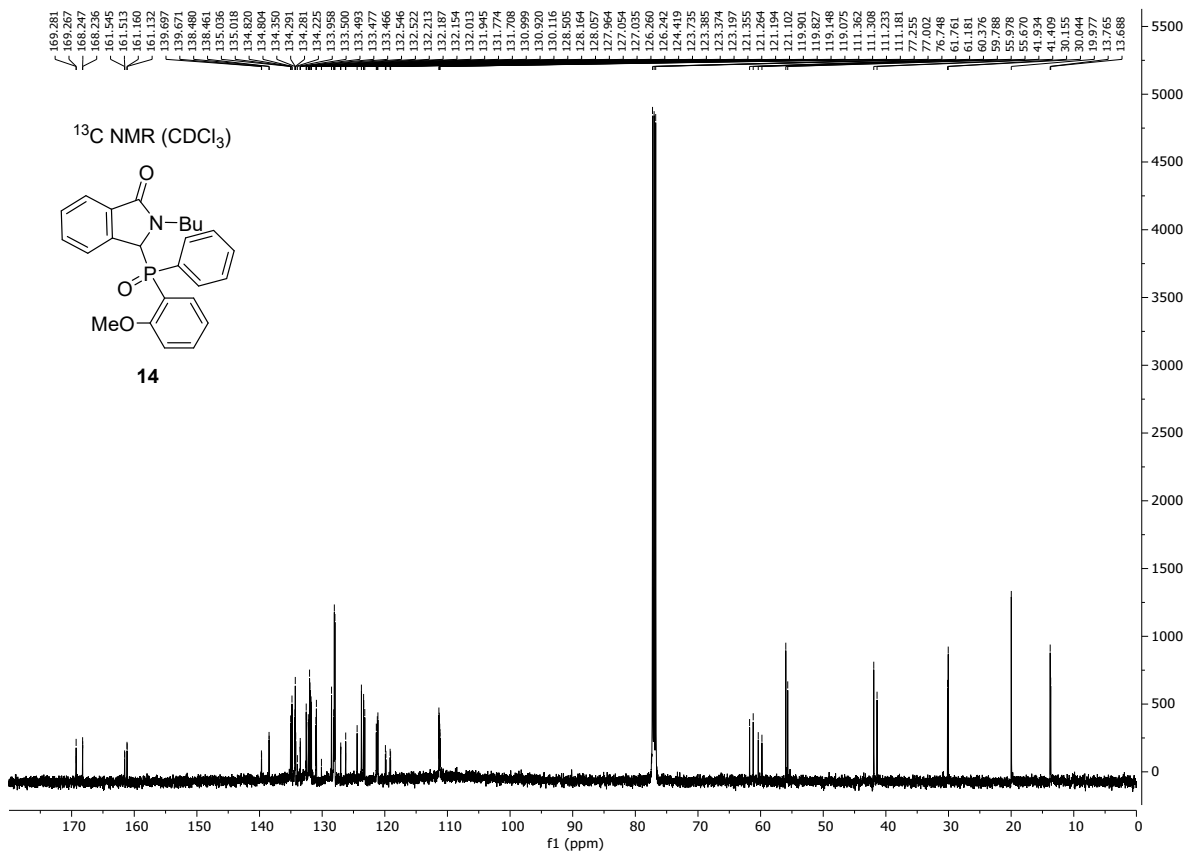

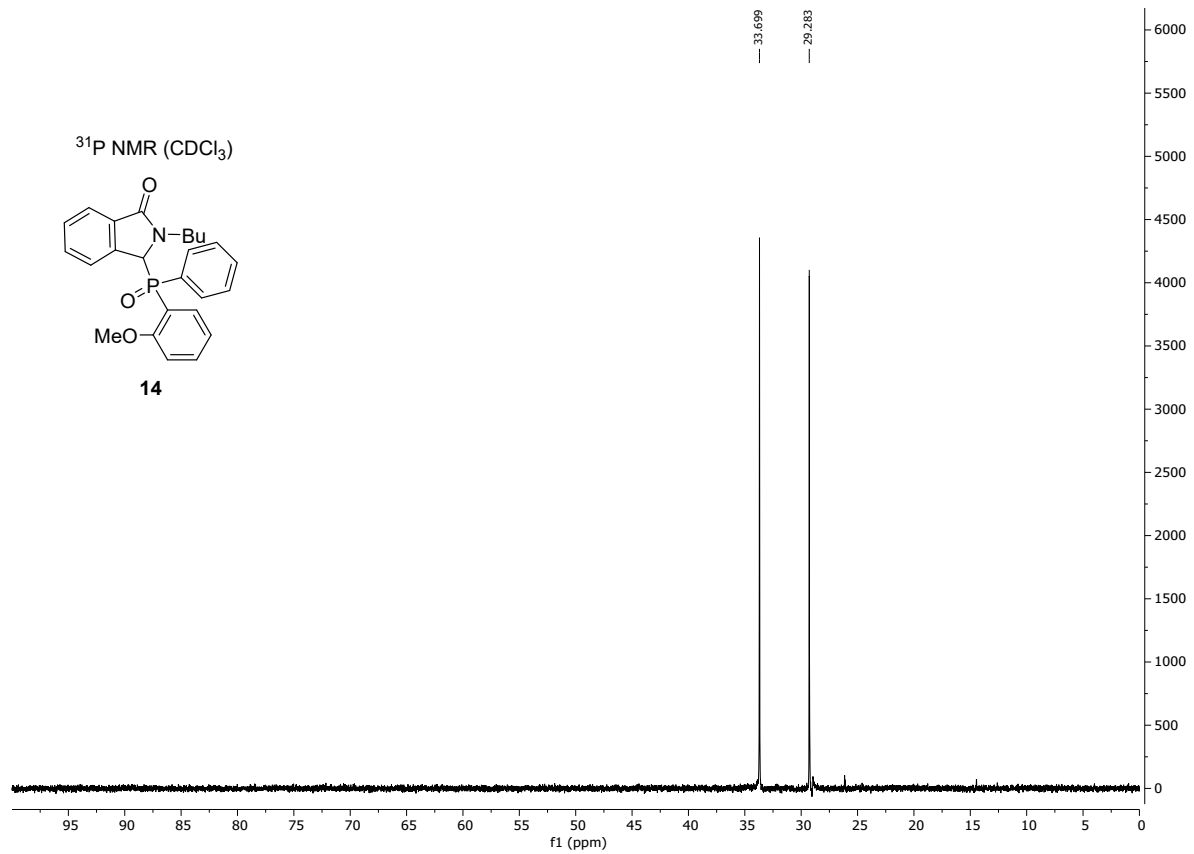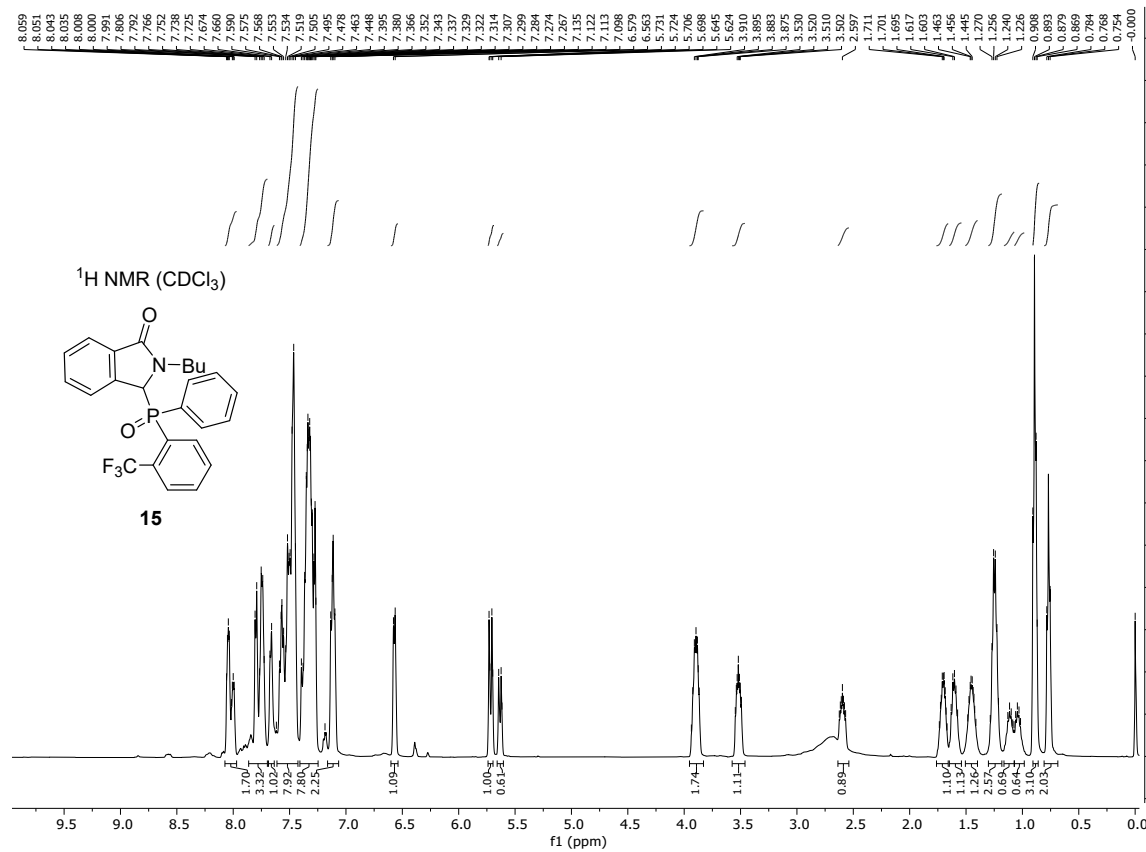

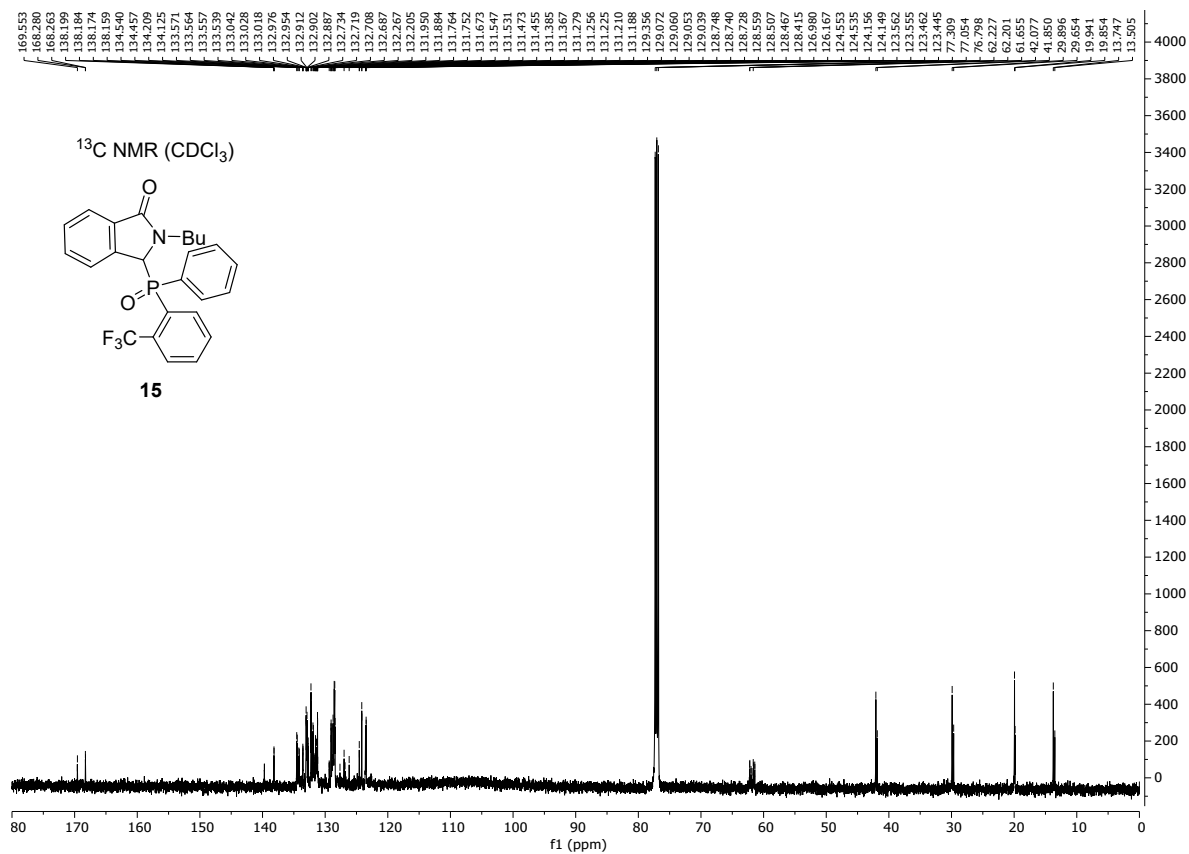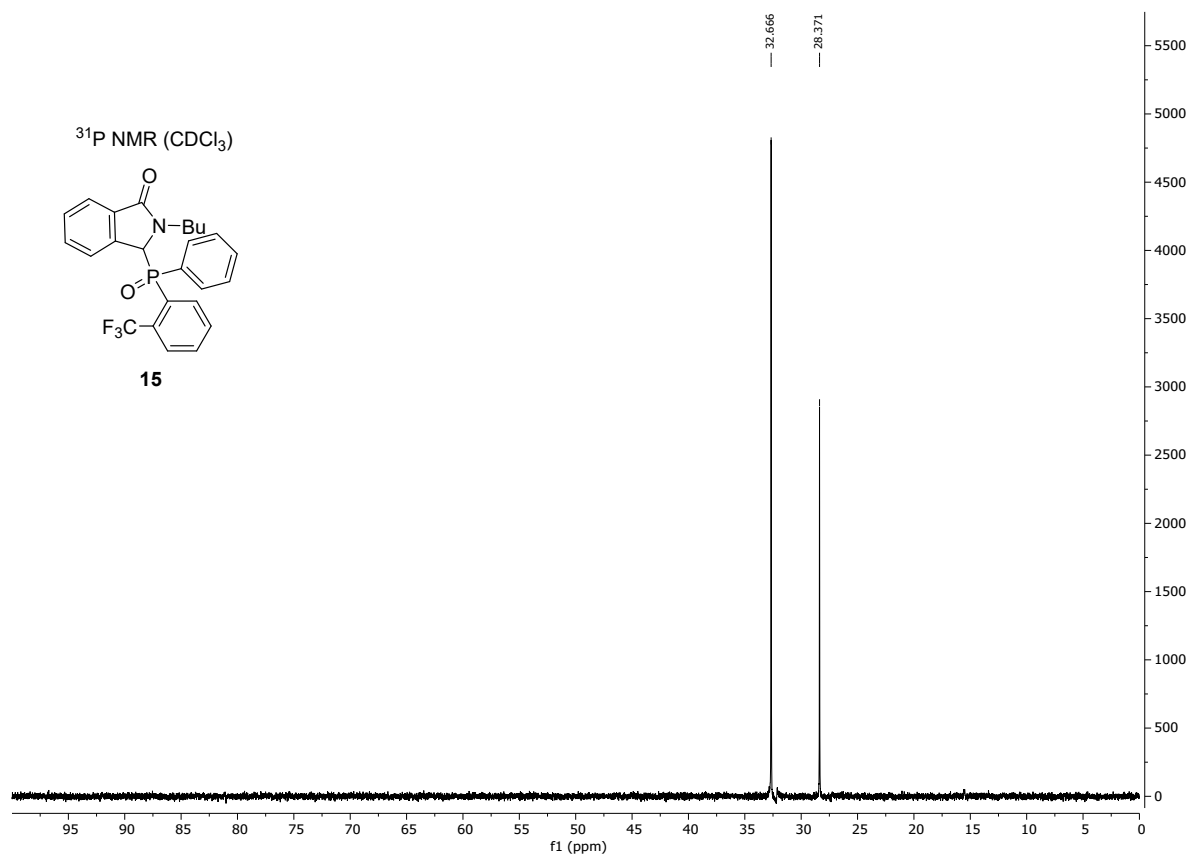

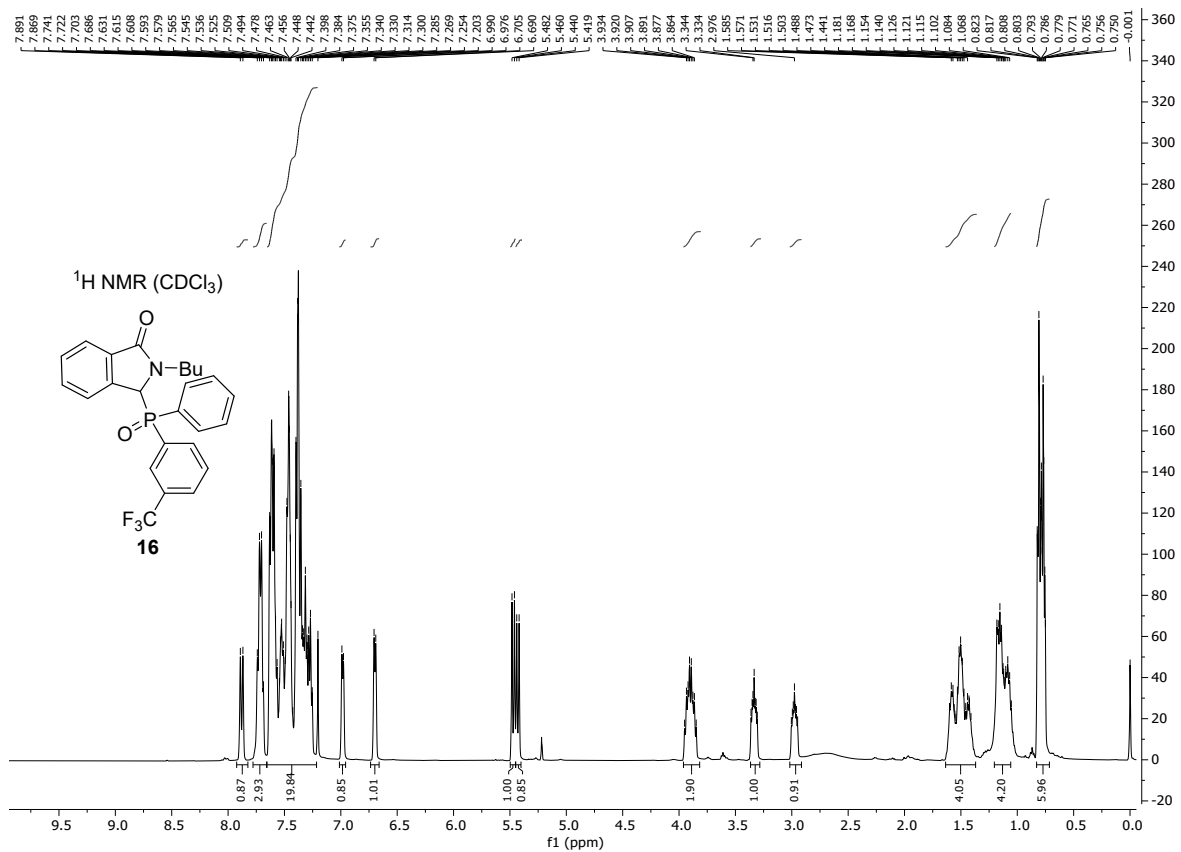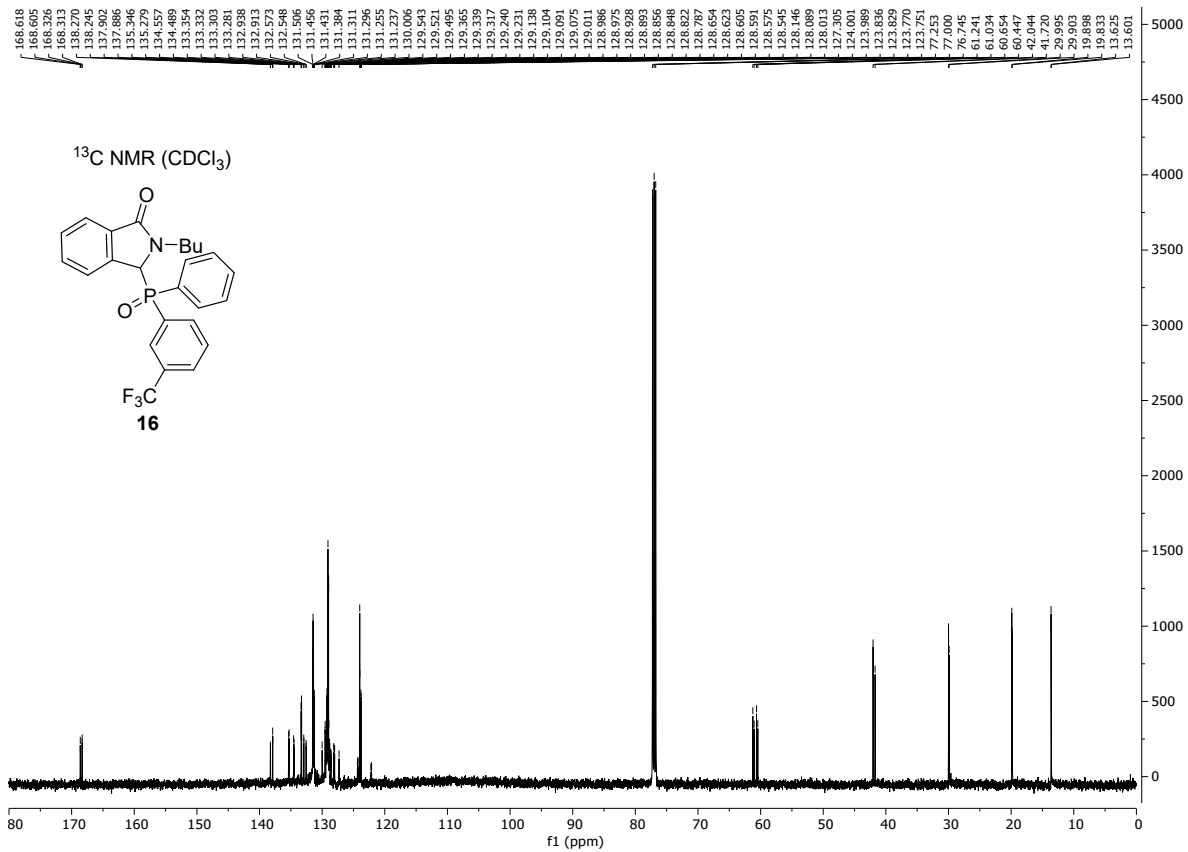

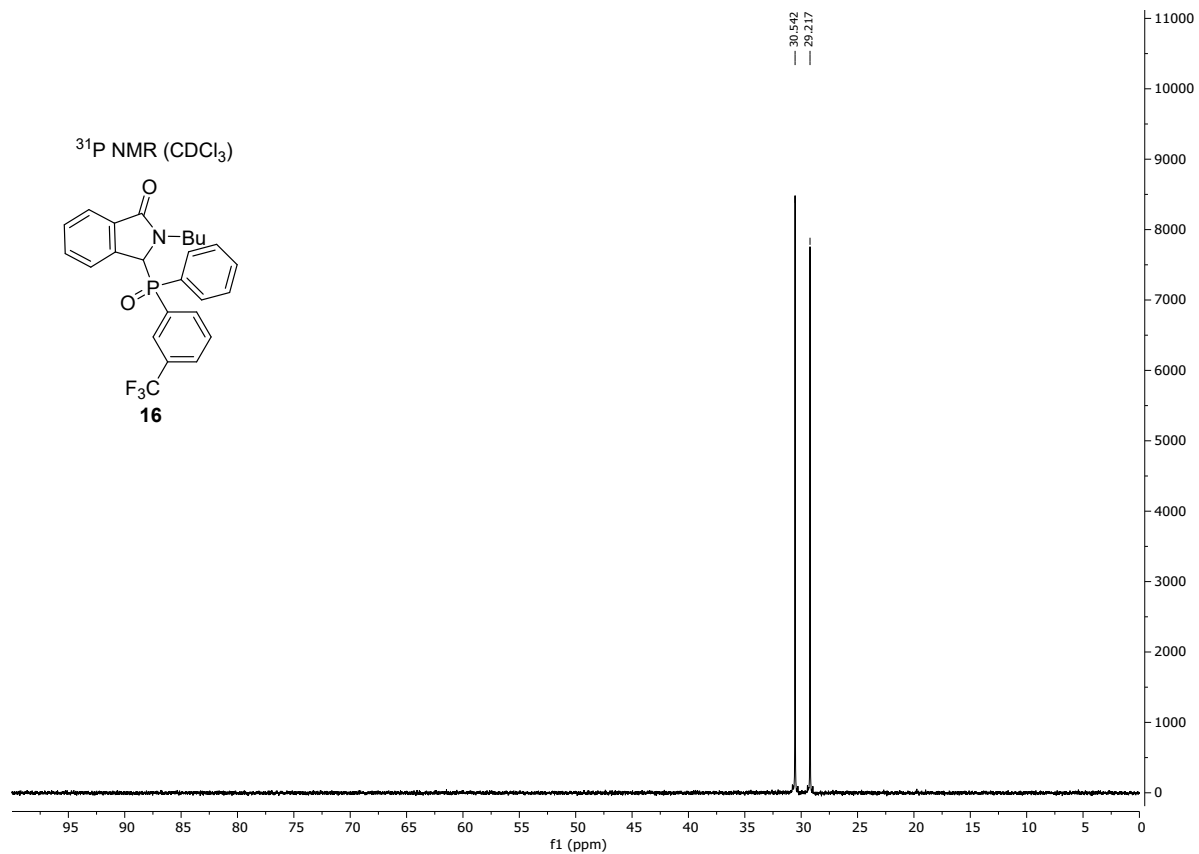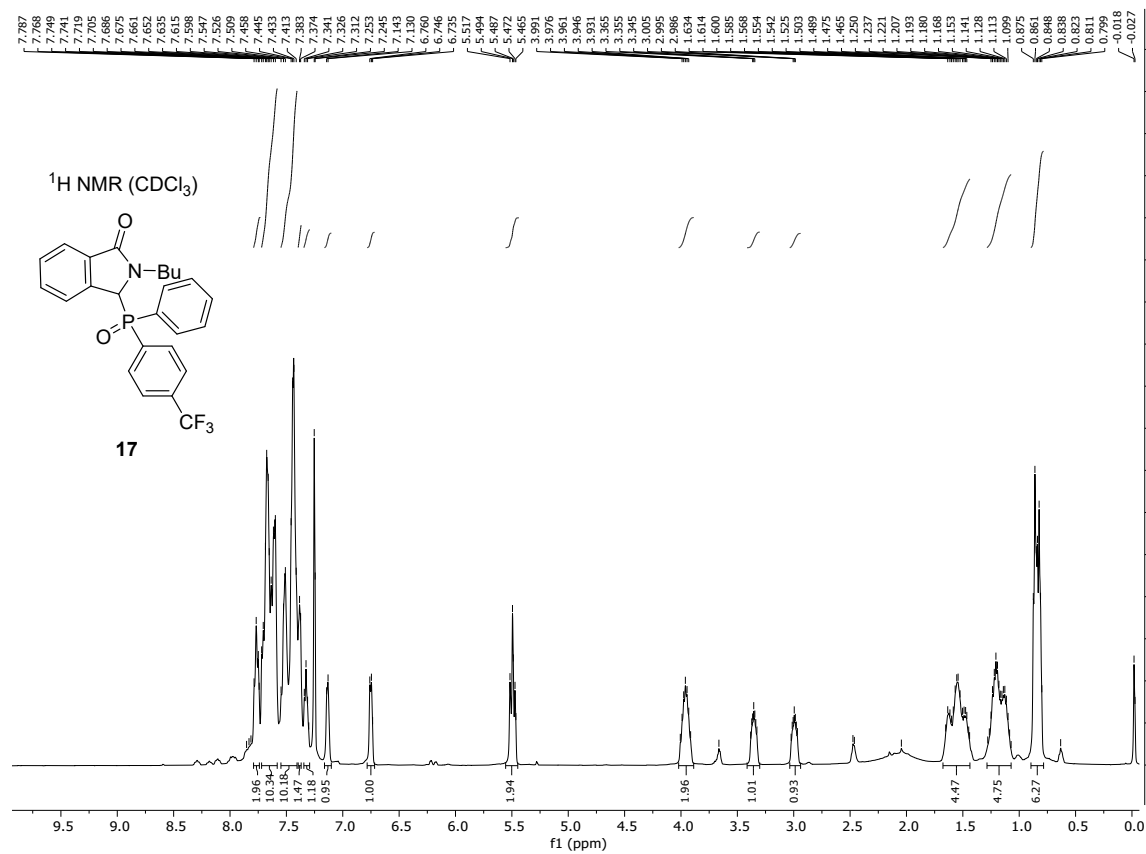

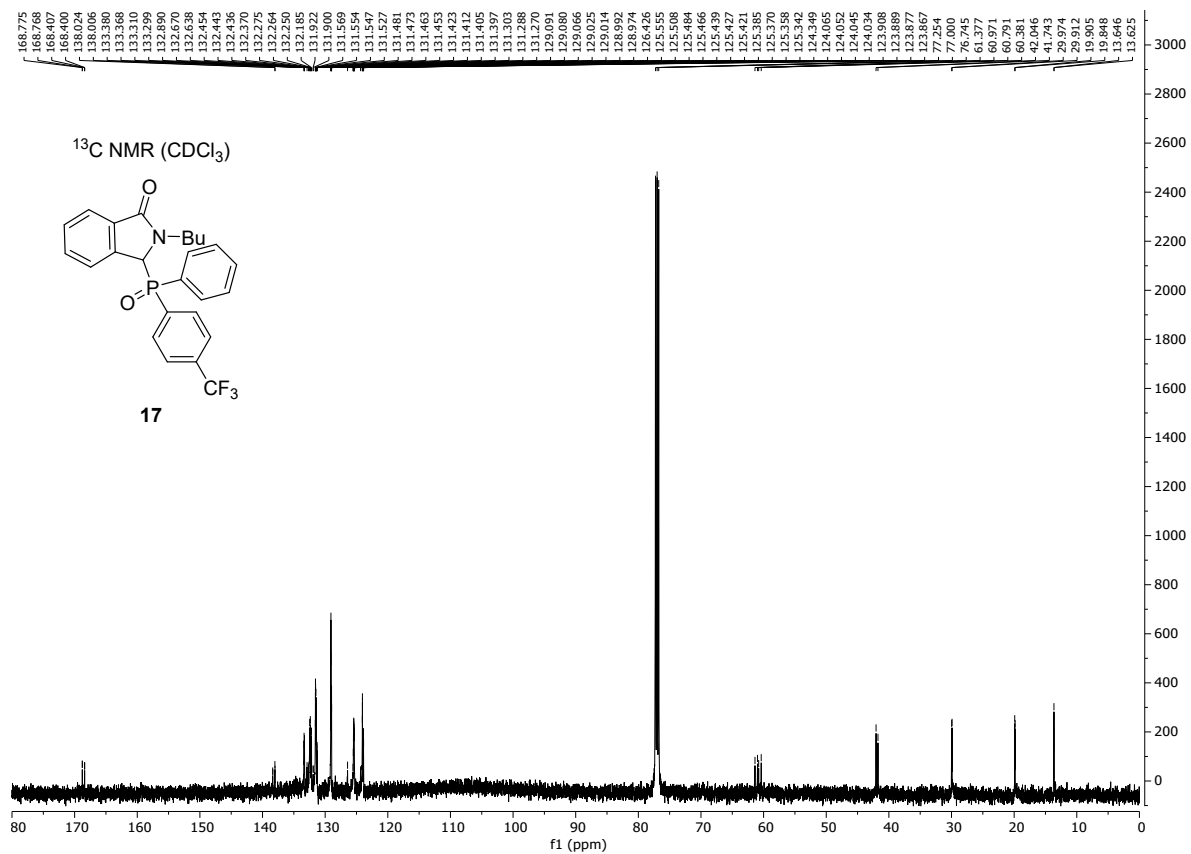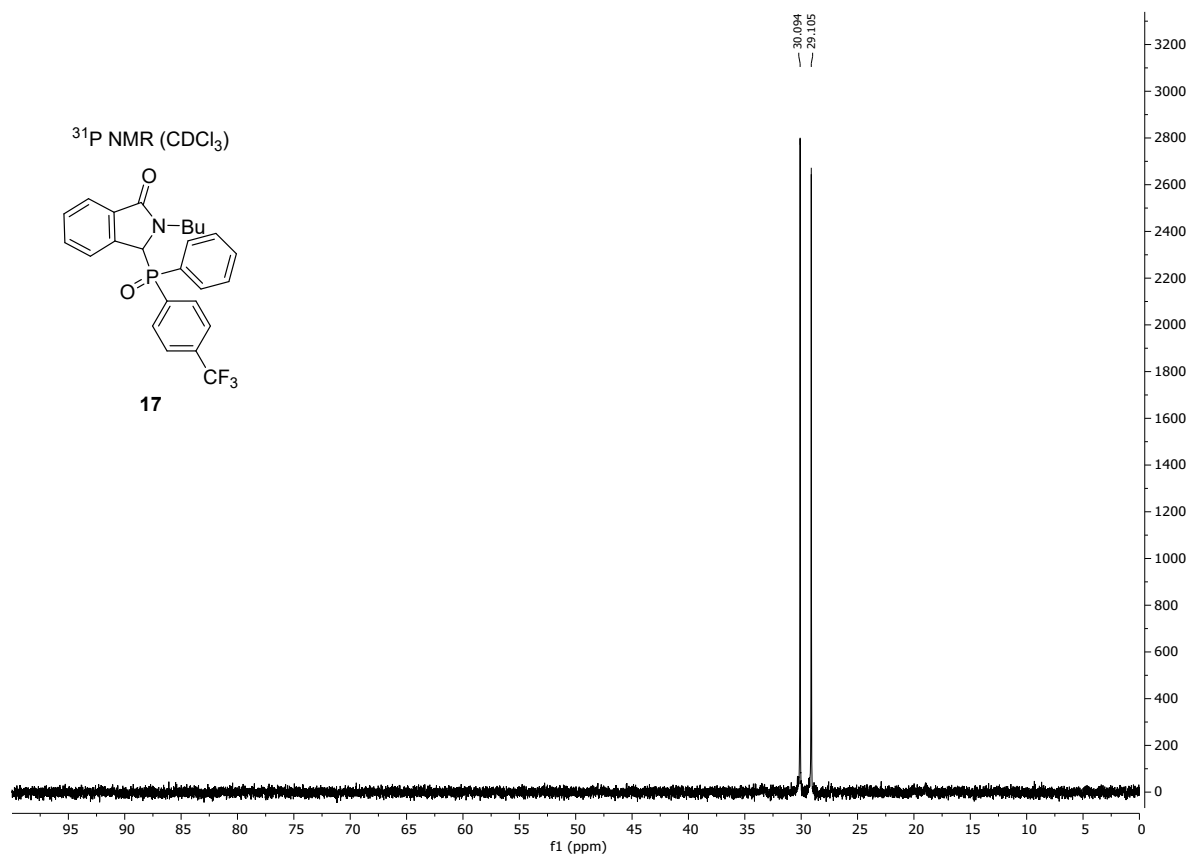

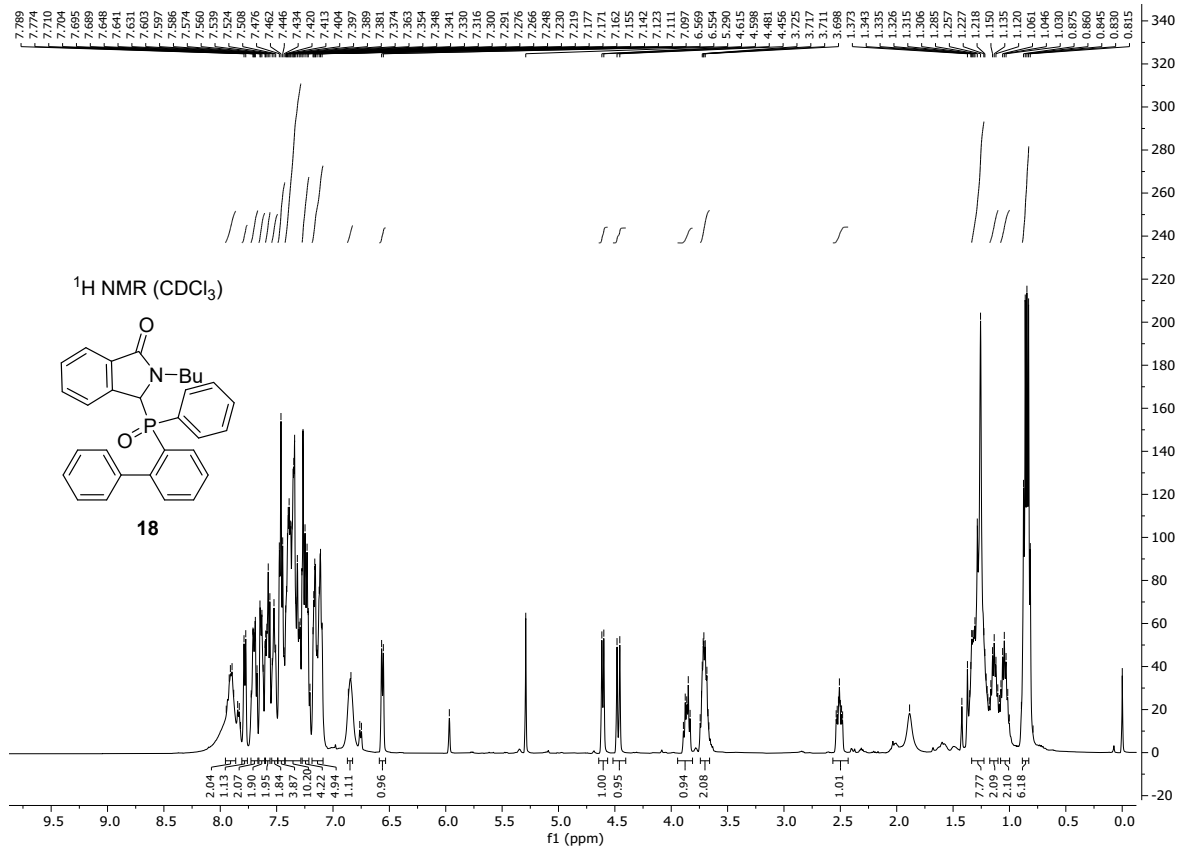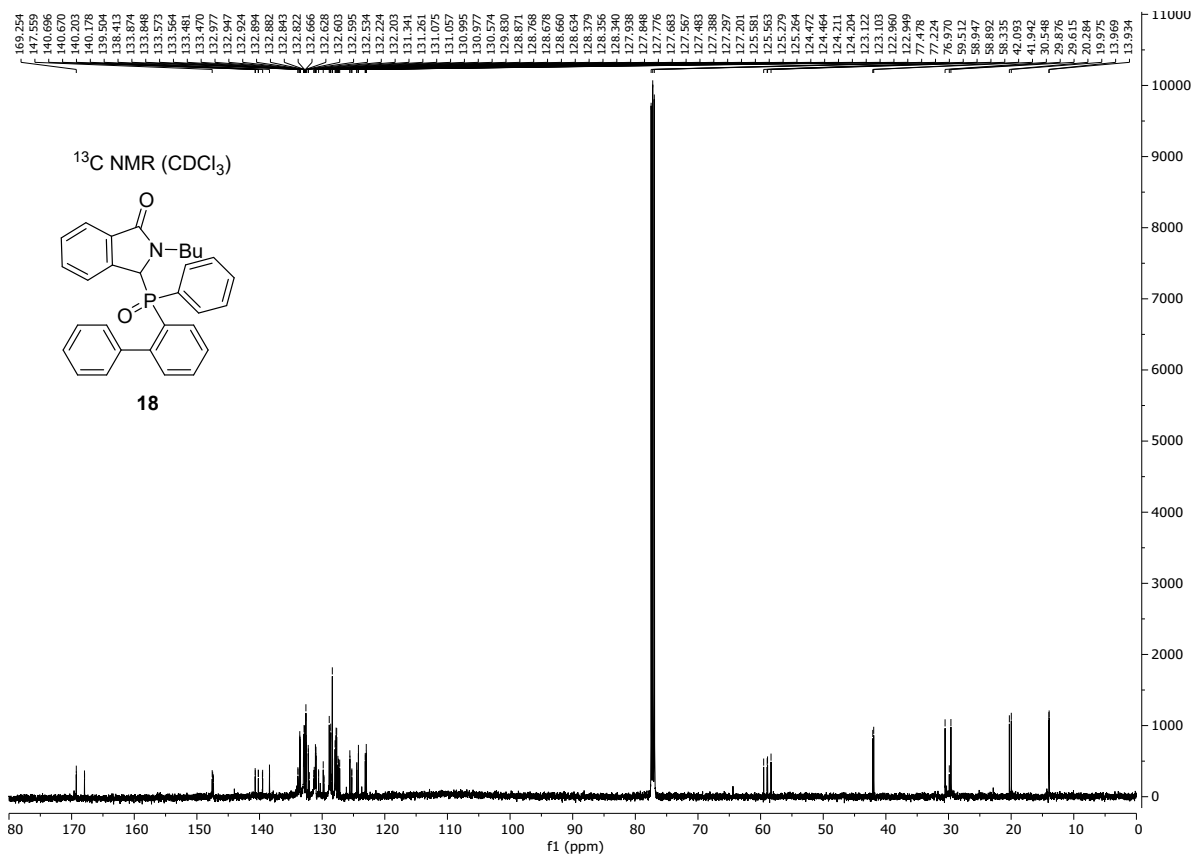



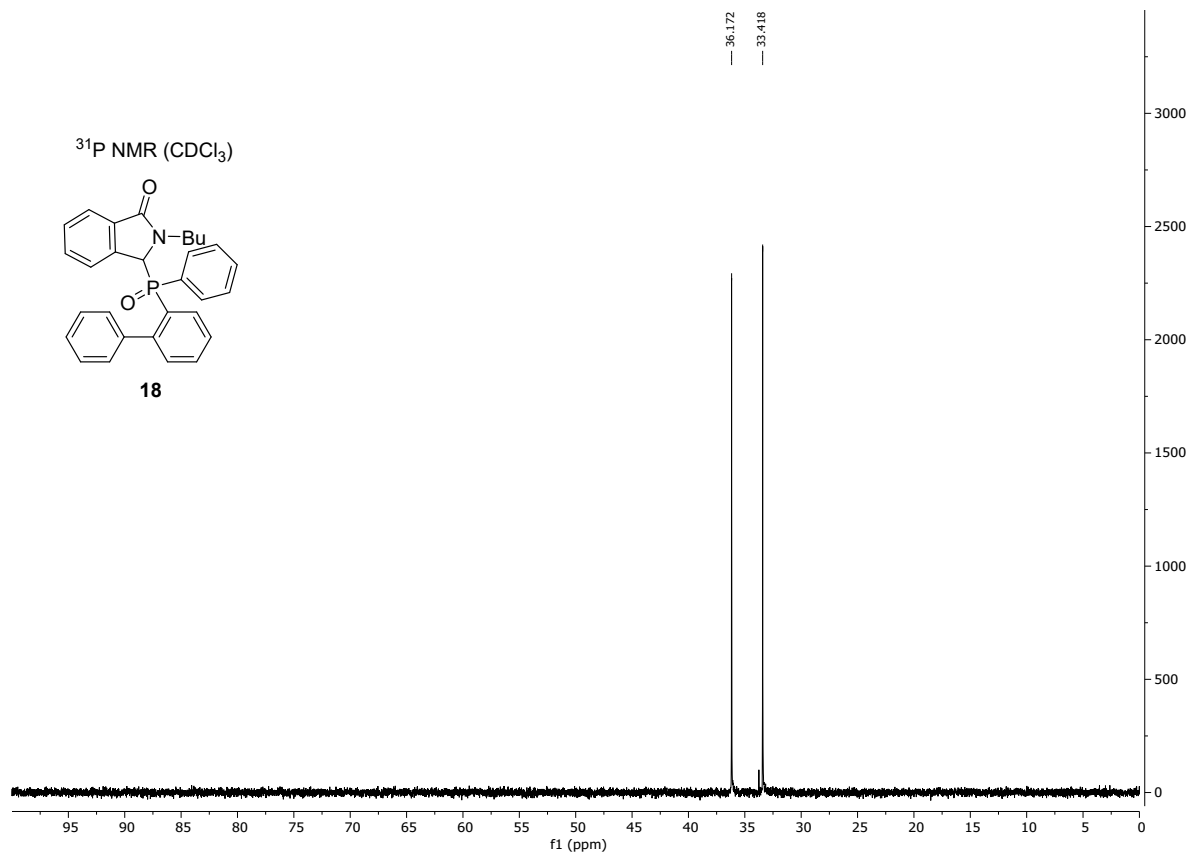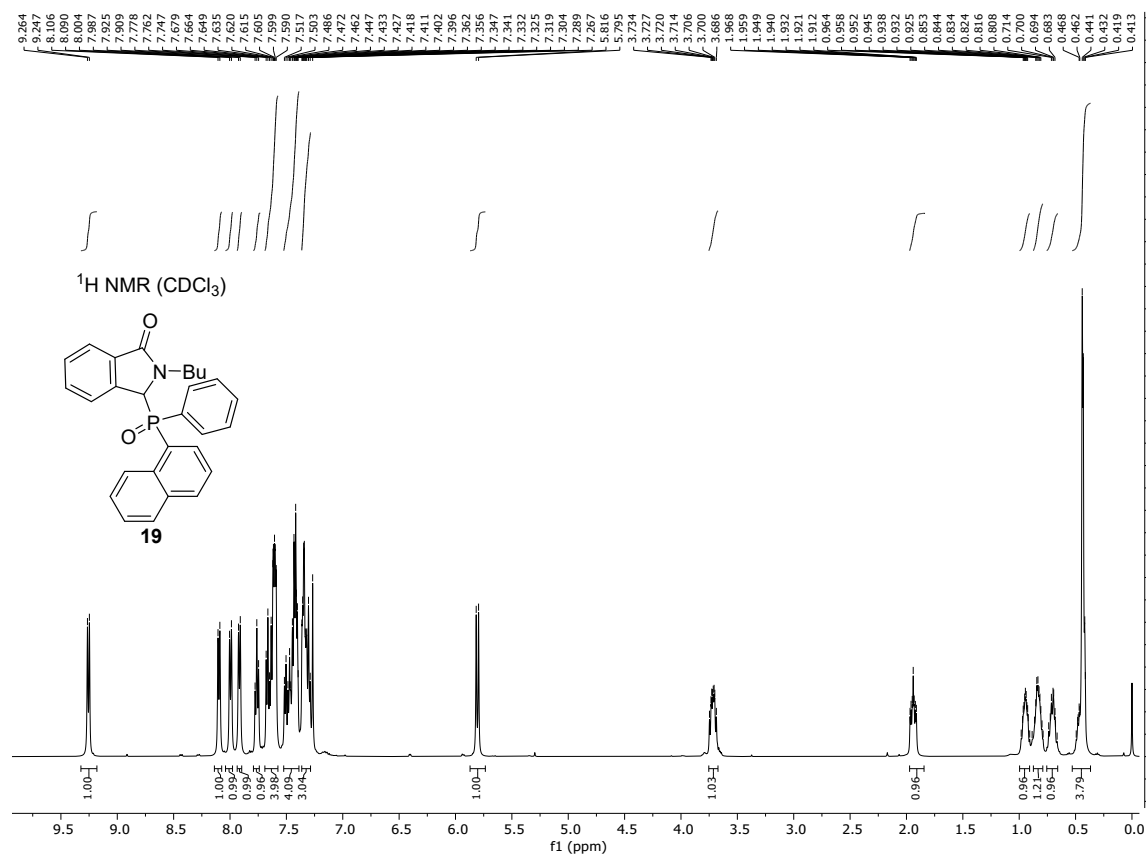

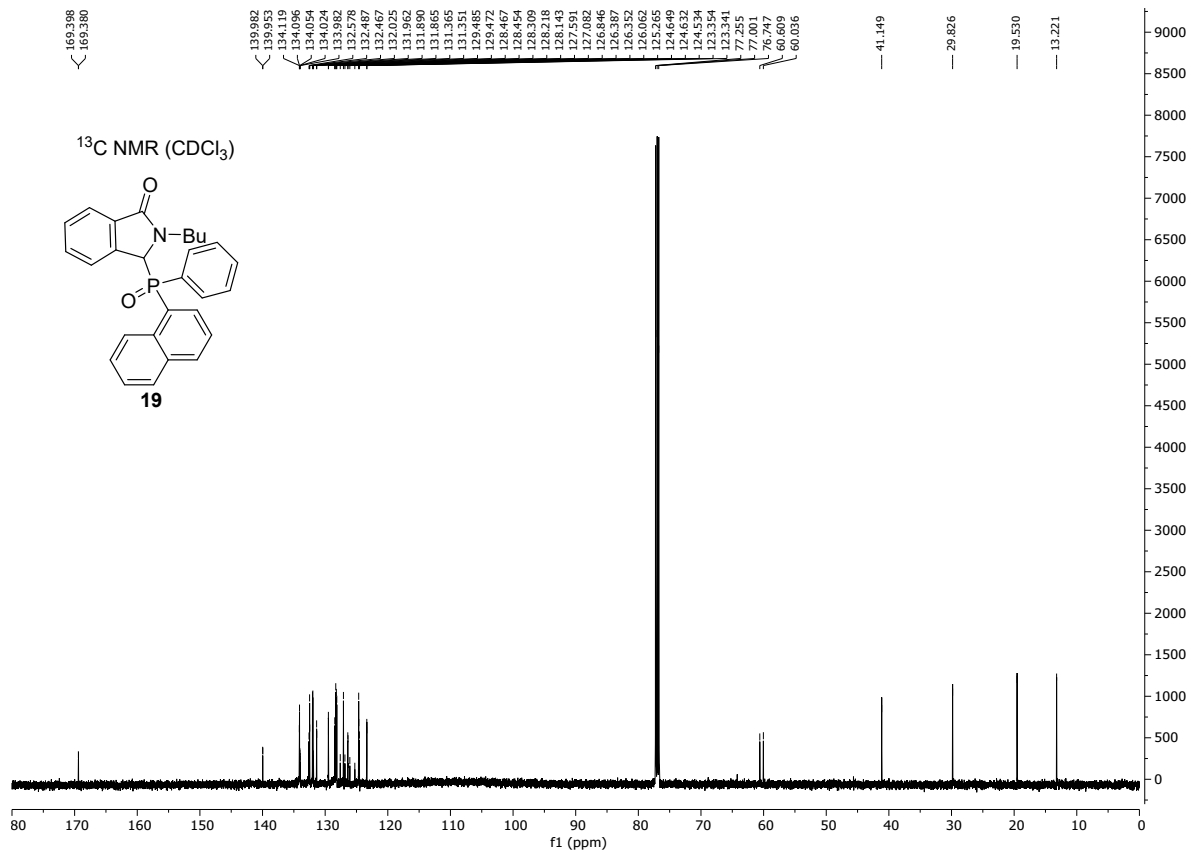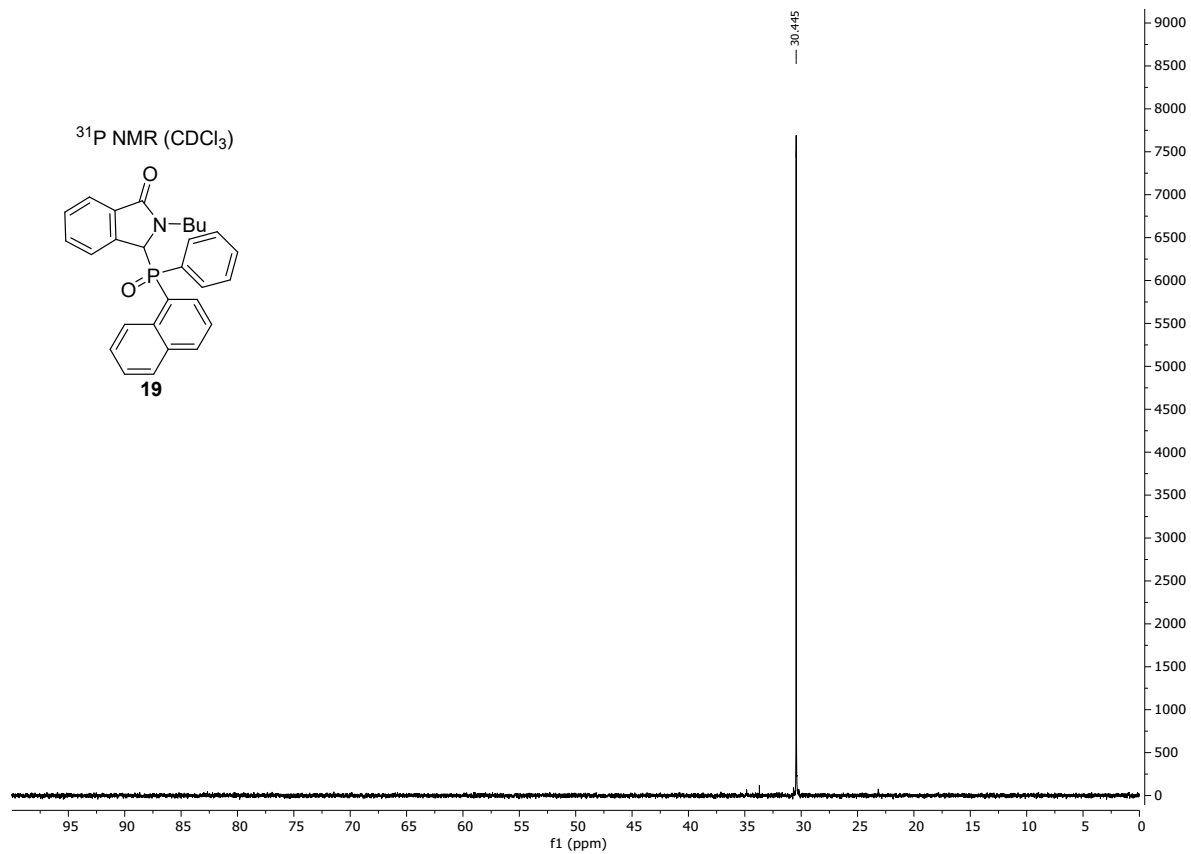

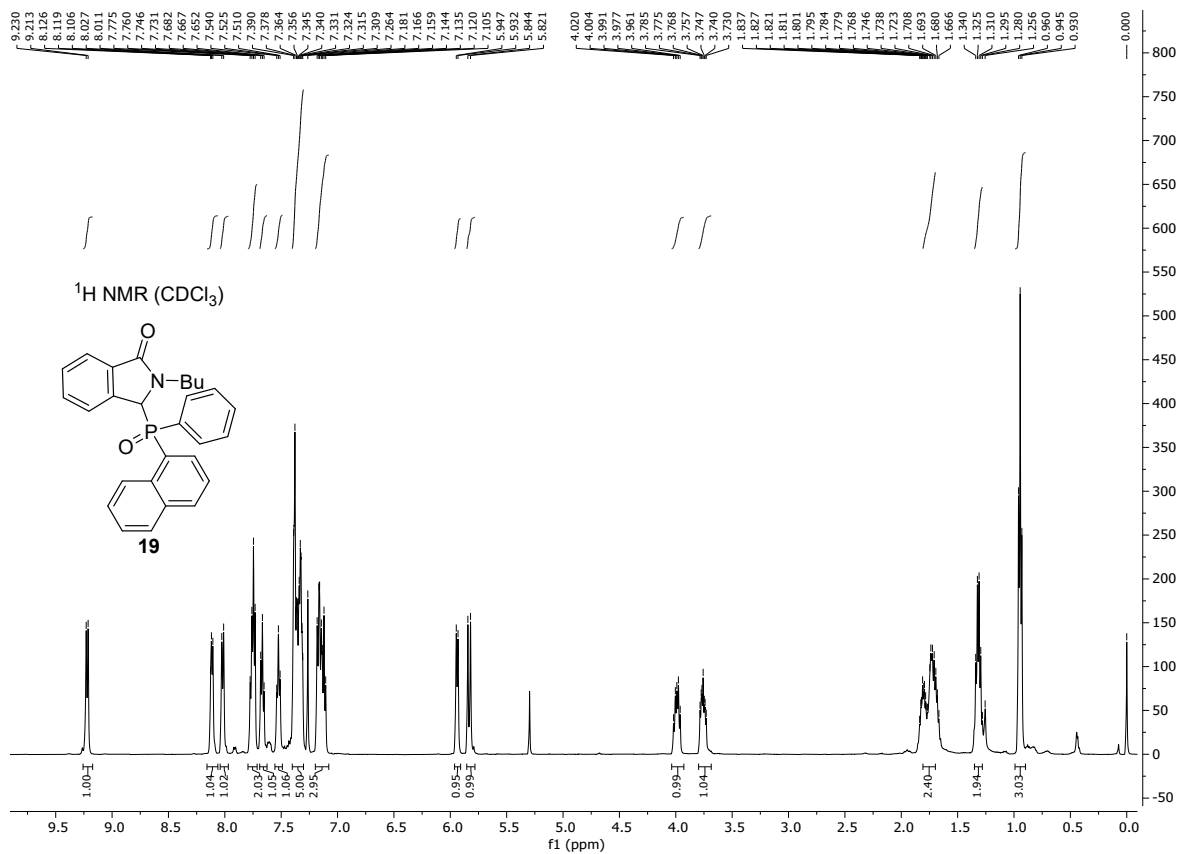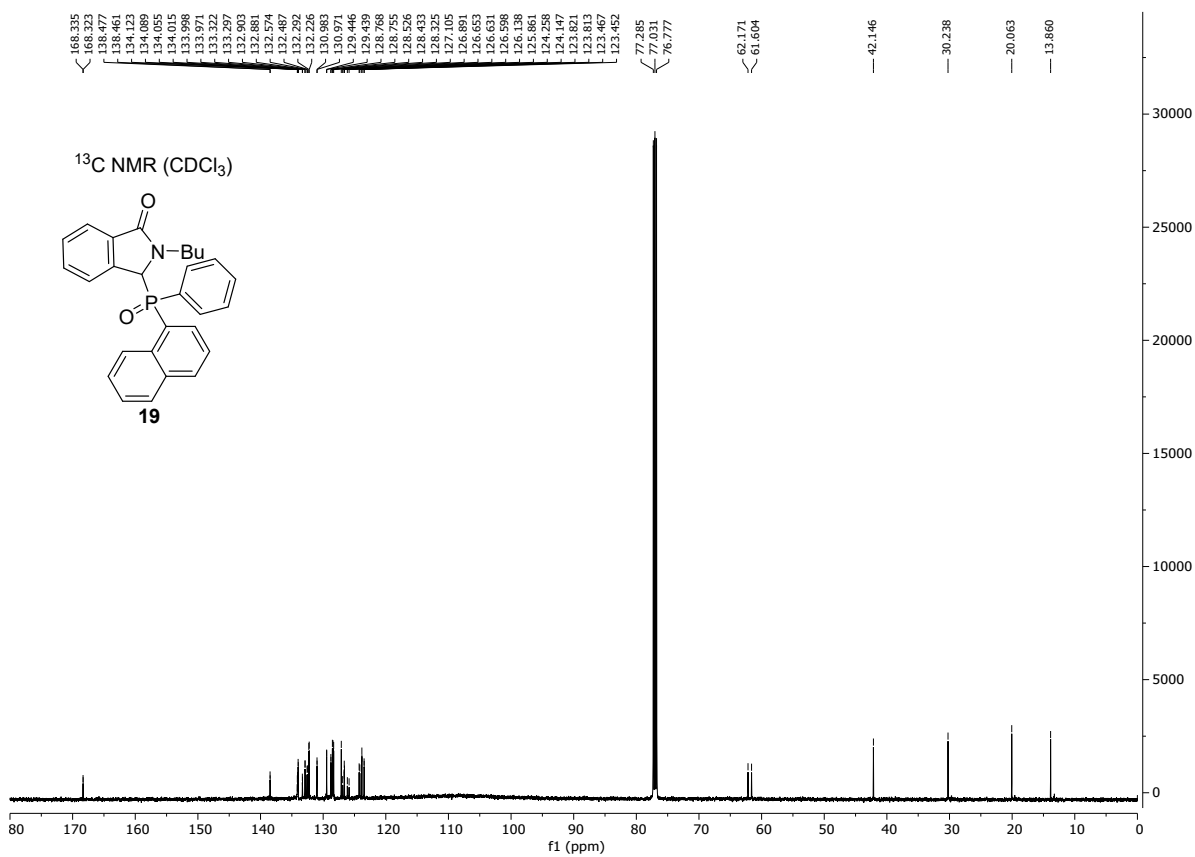

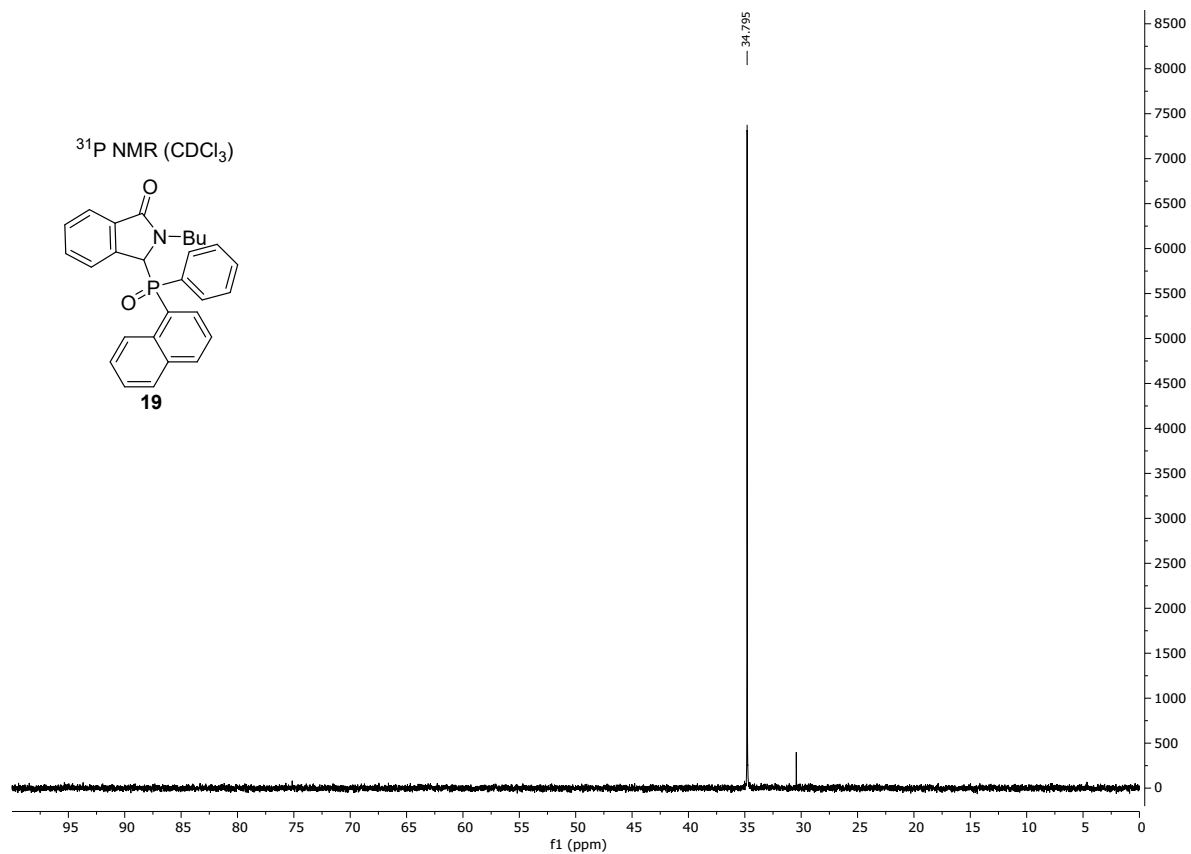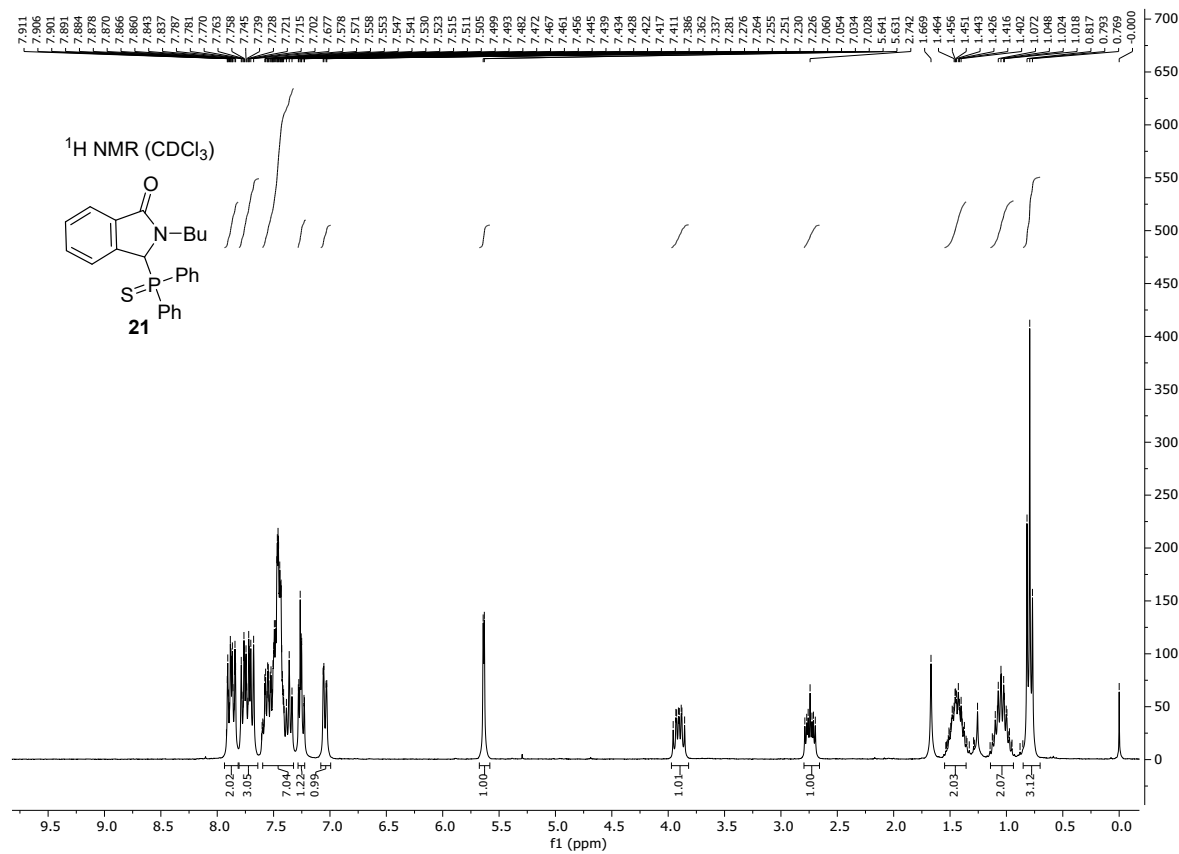

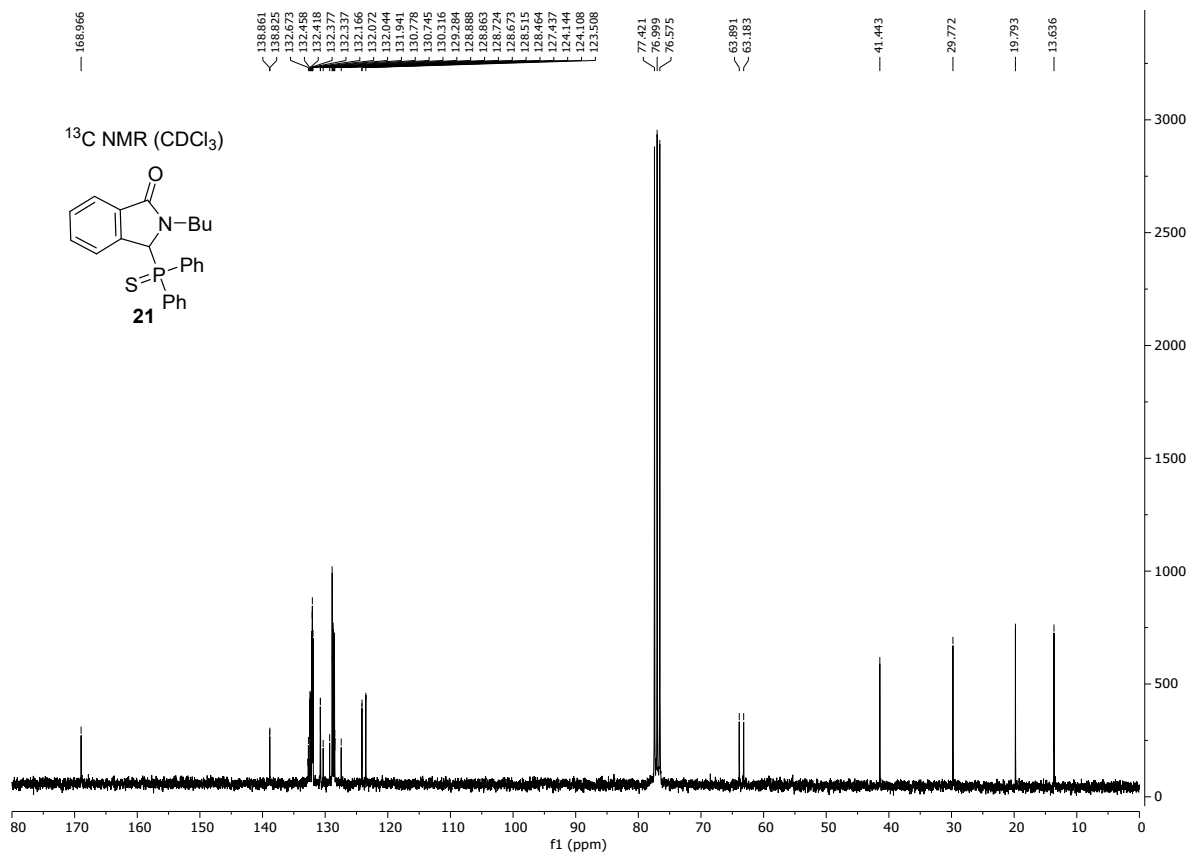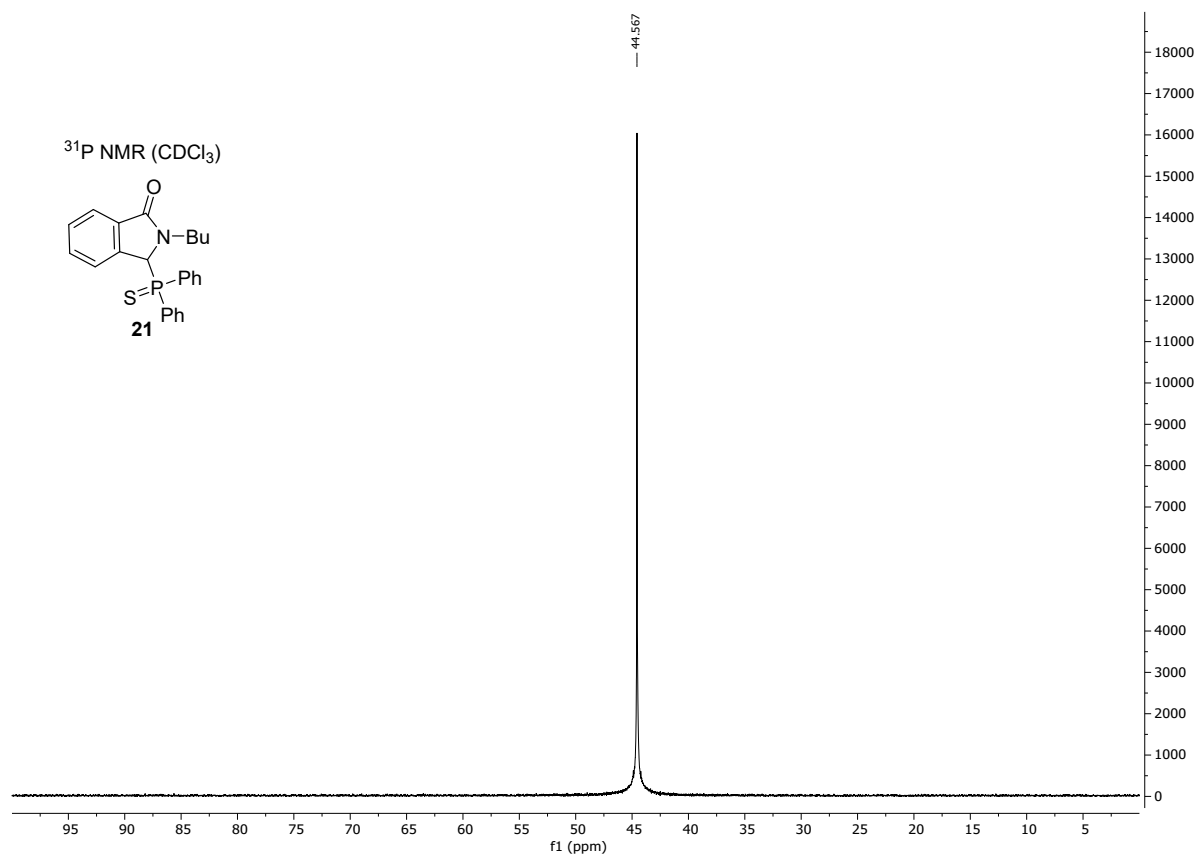

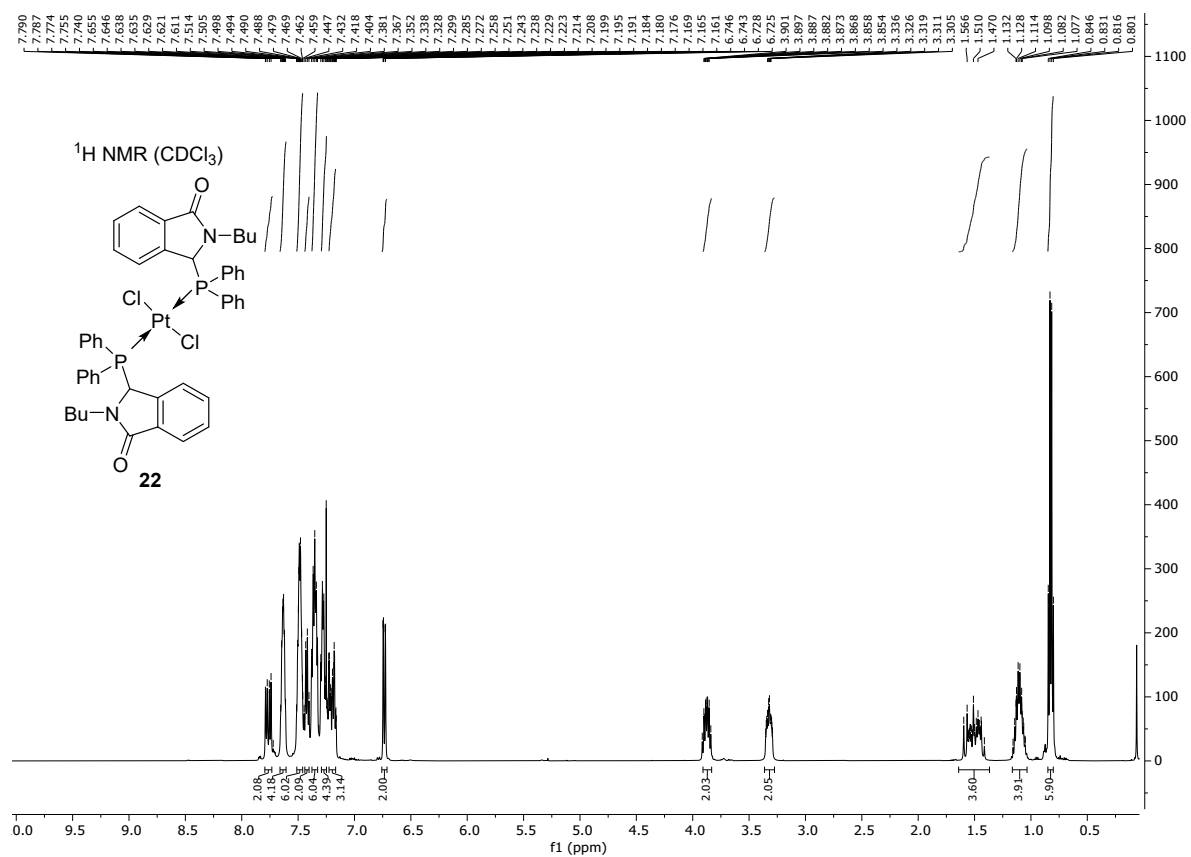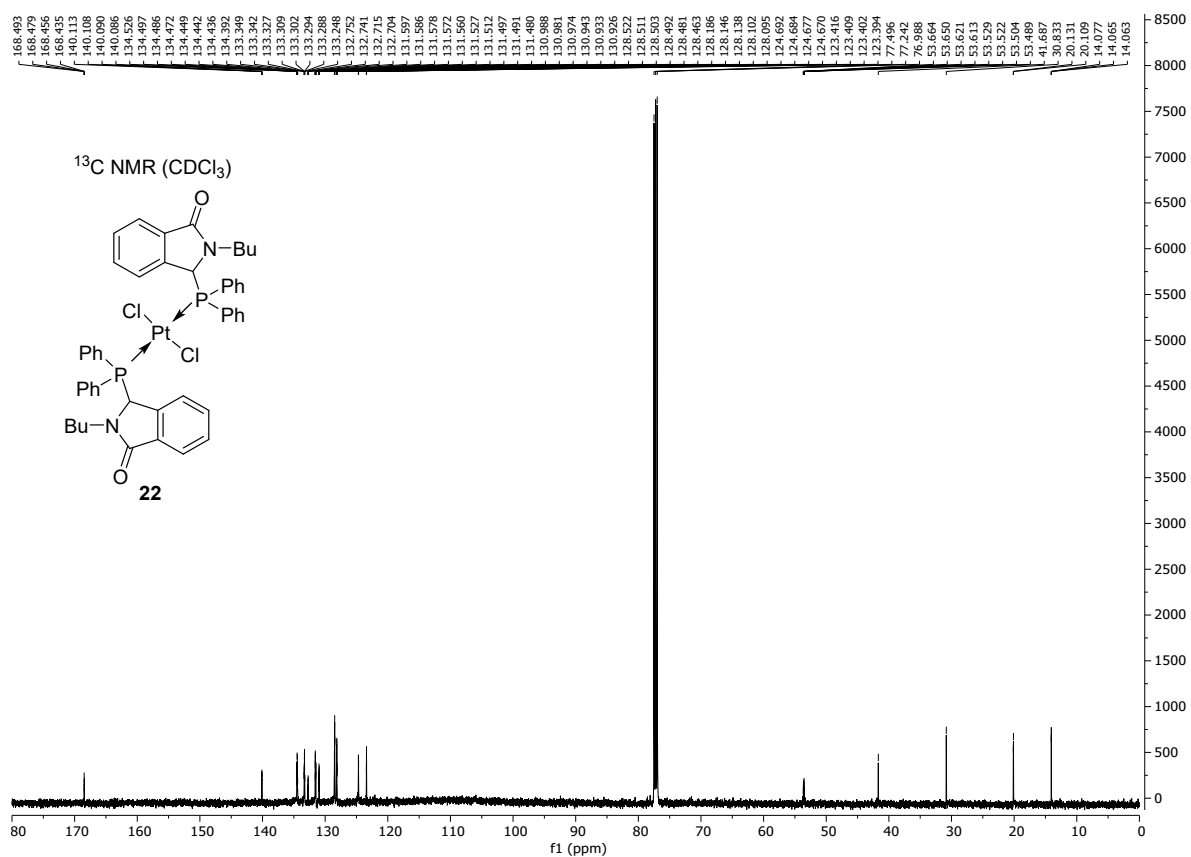

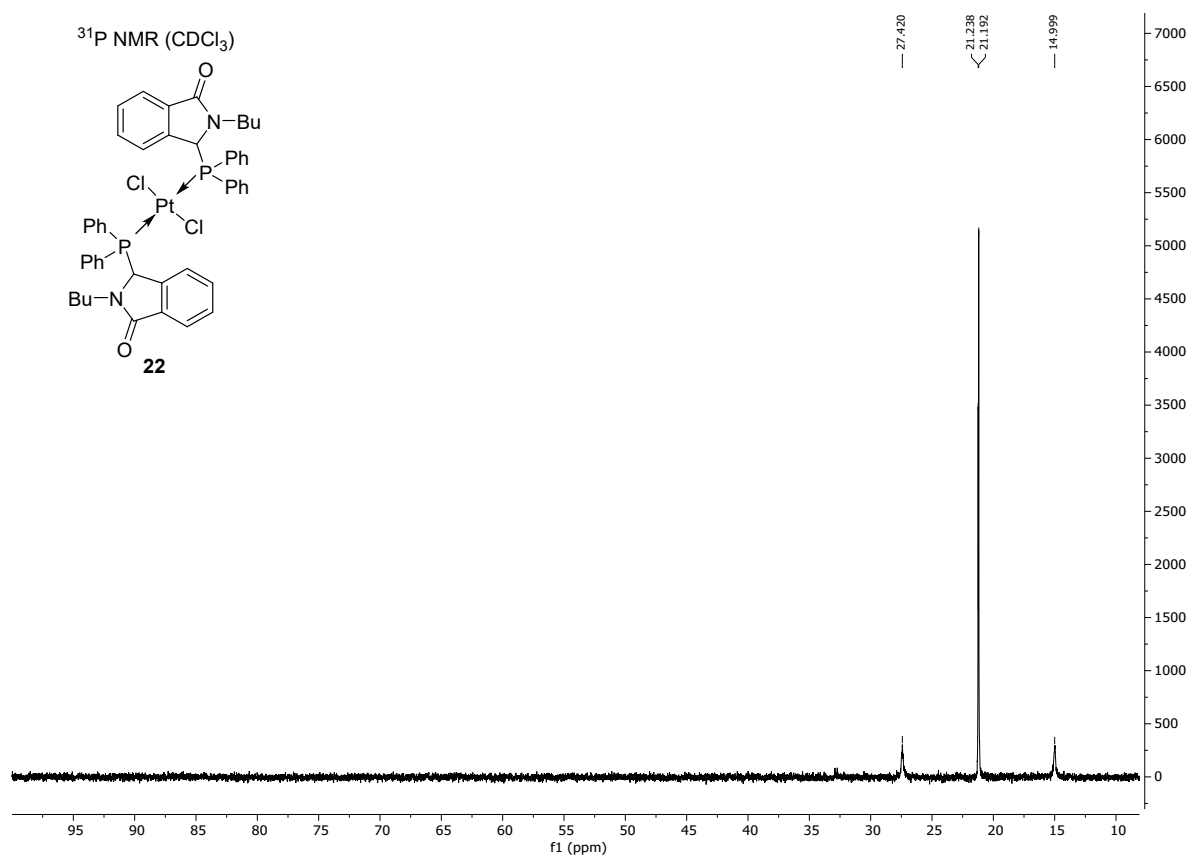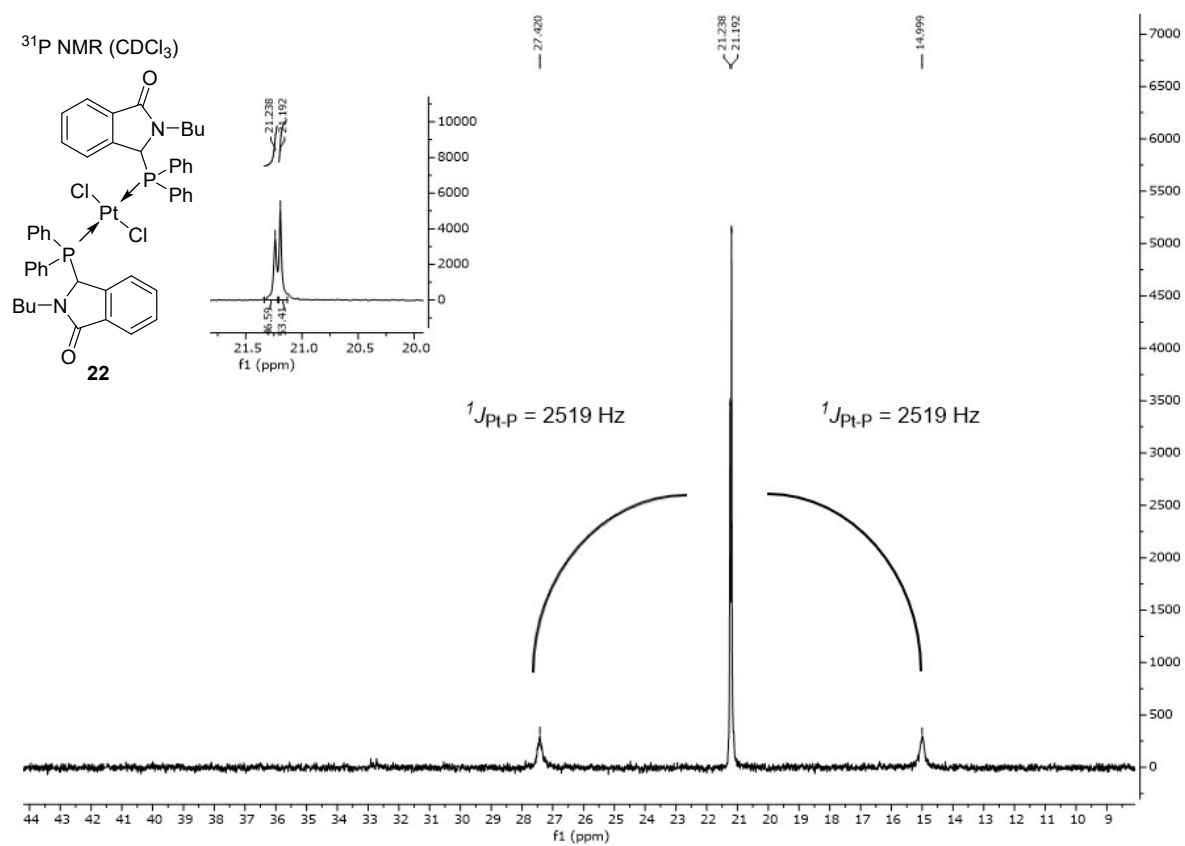

## References

- [S1] *CrysAlisPro*, version 1.171.39.46e; Rigaku Oxford Diffraction: Yarnton, UK, 2018.
- [S2] G. M. Sheldrick, *Acta Cryst.* **2015**, *A71*, 3-8.
- [S3] G. M. Sheldrick, *Acta Cryst.* **2015**, *C71*, 3-8.
- [S4] O. V. Dolomanov, L. J. Bourhis, R. J. Gildea, J. A. K. Howard and H. Puschmann, *J. Appl. Cryst.* **2009**, *42*, 339-341.
